# Supplementary material for: Predictive studies of H-atom abstraction reactions by an iron(iv)–oxo corrole cation radical oxidant
Source: Royal Society of Chemistry journal article supplement (doi:10.1039/c2cc30365e), 2012-01-01
Supplement: c2cc30365e.pdf [file c2cc30365e.pdf]

## Supporting Information

### Predictive studies of H-atom abstraction reactions by an iron(IV)-oxo corrole cation radical oxidant

Reza Latifi,<sup>a</sup> Joan S. Valentine,<sup>\*a,b</sup> Wonwoo Nam,<sup>\*a</sup> and Sam P. de Visser<sup>\*c</sup>

<sup>a</sup> Department of Chemistry and Nano Science, Department of Bioinspired Science, Centre for Biomimetic Systems, Ewha Womans University, Seoul 120-750, Korea. Fax: +82 3277 4441; E-mail: [wynam@ewha.ac.kr](mailto:wynam@ewha.ac.kr)

<sup>b</sup> Department of Chemistry and Biochemistry, UCLA Los Angeles, CA 90095-1569, USA; E-mail: [jsv@chem.ucla.edu](mailto:jsv@chem.ucla.edu)

<sup>c</sup> Manchester Interdisciplinary Biocenter and School of Chemical Engineering and Analytical Science, University of Manchester, 131 Princess Street, Manchester M1 7DN, UK. Fax: +44 161 3065201; E-mail: [sam.devisser@manchester.ac.uk](mailto:sam.devisser@manchester.ac.uk)

#### Methods:

The calculations presented in this work employed extensively tested and benchmarked methods that are based on density functional theory.<sup>1</sup> All structures were fully optimized with the B3LYP density functional method<sup>2</sup> in *Gaussian-03*<sup>3</sup> and followed by a frequency calculation. Vibrational frequencies reported in this work are taken from the *Gaussian-03* frequency calculations of the stationary points and reported without scaling factors. A double- $\zeta$  quality LACVP basis set on Fe (with core potential) coupled to 6-31G on the rest of the atoms (C, N, O, H) was used for the geometry optimizations (basis set B1),<sup>4</sup> but followed by single point calculations using an LACV3P+ basis set (with core potential) on Fe and 6-311+G\* on the rest of the atoms (basis set B2). All local minima described here had real frequencies only, while the transition states are characterized by a single imaginary frequency for the correct mode, i.e. a C-H-O stretch vibration for the hydrogen abstraction transition states. Energies reported in this work were calculated using an LACV3P+ basis set on Fe and 6-311+G\* on the rest of the atoms (basis set B2), whereas zero-point energies were taken from the LACVP (Basis set B1) frequency calculations. Our calculations consider both the doublet and quartet spin state surfaces. Because we deal with open shell doublet spin states with three unpaired electrons the calculations for this spin state contain a minor degree of spin contamination.

Bond dissociation energies ( $BDE_{CH}$ ) were defined as in Eq 1 and calculated from the energy difference of the substrate (SubH) and the sum of an isolated hydrogen atom and substrate radical rest-group (Sub $\cdot$ ). Our B3LYP/B2 calculated  $BDE_{CH}$  values (with ZPE included) match experimental values well.<sup>5</sup>

Following previous studies in the field, we corrected the  $BDE_{CH}$  value for the reorganization energy (RE) of the substrate (SubH) by taking the geometry of Sub $\cdot$  in the geometry of SubH as compared to the full relaxed geometry of the radical.<sup>6</sup> The combination of  $BDE_{CH}$  and  $RE_{Sub\cdot}$  in eq 2 defines the bond strength ( $D_{CH}$ ), which is a more faithful measure of the interaction strength between the bonded Sub and H moieties in the alkane:<sup>7</sup>

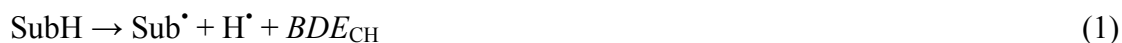

$$D_{\text{CH}} = BDE_{\text{CH}} + RE_{\text{Sub}} \quad (2)$$

## References:

1. (a) de Visser, S. P. *J. Am. Chem. Soc.* **2010**, *132*, 1087–1097. (b) Kumar, D.; Karamzadeh, B.; Sastry, G. N.; de Visser, S. P. *J. Am. Chem. Soc.* **2010**, *132*, 7656–7667.
2. (a) Becke, A. D. *J. Chem. Phys.* **1993**, *98*, 5648–5652. (b) Lee, C.; Yang, W.; Parr, R. G. *Phys. Rev. B* **1988**, *37*, 785–789.
3. Frisch, M. J.; Trucks, G. W.; Schlegel, H. B.; Scuseria, G. E.; Robb, M. A.; Cheeseman, J. R.; Montgomery, Jr., J. A.; Vreven, T.; Kudin, K. N.; Burant, J. C.; Millam, J. M.; Iyengar, S. S.; Tomasi, J.; Barone, V.; Mennucci, B.; Cossi, M.; Scalmani, G.; Rega, N.; Petersson, G. A.; Nakatsuji, H.; Hada, M.; Ehara, M.; Toyota, K.; Fukuda, R.; Hasegawa, J.; Ishida, M.; Nakajima, T.; Honda, Y.; Kitao, O.; Nakai, N.; Klene, M.; Li, X.; Knox, J. E.; Hratchian, H. P.; Cross, J. B.; Adamo, C.; Jaramillo, J.; Gomperts, R.; Stratmann, R. E.; Yazyev, O.; Austin, A. J.; Cammi, R.; Pomelli, C.; Ochterski, J. W.; Ayala, P. Y.; Morokuma, K.; Voth, G. A.; Salvador, P.; Dannenberg, J. J.; Zakrzewski, V. G.; Dapprich, S.; Daniels, A. D.; Strain, M. C.; Farkas, O.; Malick, D. K.; Rabuck, A. D.; Raghavachari, K.; Foresman, J. B.; Ortiz, J. V.; Cui, Q.; Baboul, A. G.; Clifford, S.; Cioslowski, J.; Stefanov, B. B.; Liu, G.; Liashenko, A.; Piskorz, P.; Komaromi, I.; Martin, R. L.; Fox, D. J.; Keith, T.; Al-Laham, M. A.; Peng, C. Y.; Nanayakkara, A.; Challacombe, M.; Gill, P. M. W.; Johnson, B.; Chen, W.; Wong, M. W.; Gonzalez, C.; Pople, J. A. Gaussian 03, revision C.02; Gaussian, Inc., Wallingford, CT, 2004.
4. Hay, P. J.; Wadt, W. R. *J. Chem. Phys.* **1985**, *82*, 270–283.
5. Lide, D. R. (Ed.) *The Handbook of Chemistry and Physics*, 76<sup>th</sup> Ed., CRC Press, Boca Raton, FA, 1996.
6. Bernardi, F.; Cherry, W.; Shaik, S.; Epiotis, N. D. *J. Am. Chem. Soc.* **1978**, *100*, 1352–1356.
7. de Visser, S. P.; Kumar, D.; Cohen, S.; Shacham, R.; Shaik, S. *J. Am. Chem. Soc.* **2004**, *126*, 8362–8363.

**Table S1.** Absolute energies, zero-point energies, free energies of isolated reactants and intermediates optimized geometries on UB3LYP/B1. UB3LYP/B2 single points and also solvent single points obtained from UB3LYP/B2//UB3LYP/B1.

| Substrate                                                    | E (B1)<br>(au) | ZPE<br>(au) | G<br>(au)   | E (B2)<br>(au) | E+Esolvent<br>(B2) |
|--------------------------------------------------------------|----------------|-------------|-------------|----------------|--------------------|
| <sup>2</sup> [Fe <sup>IV</sup> =O(Corrole <sup>++</sup> )]   | -1148.06160    | 0.26238     | -1147.84299 | -1148.58028    | -1148.58745        |
| <sup>4</sup> [Fe <sup>IV</sup> =O(Corrole <sup>++</sup> )]   | -1148.06270    | 0.26256     | -1147.84453 | -1148.58127    | -1148.58863        |
| <sup>1</sup> [Fe <sup>IV</sup> =O(Corrole)] <sup>-</sup>     | -1148.11681    | 0.26198     | -1147.89777 | -1148.64694    | -1148.71418        |
| <sup>3</sup> [Fe <sup>IV</sup> =O(Corrole)] <sup>-</sup>     | -1148.16072    | 0.26217     | -1147.94248 | -1148.69116    | -1148.75867        |
| <sup>1</sup> [Fe <sup>IV</sup> -OH(Corrole)]                 | -1148.67085    | 0.27414     | -1148.44012 | -1149.19579    | -1149.19913        |
| <sup>1</sup> [Fe <sup>III</sup> -OH(Corrole <sup>++</sup> )] | -1148.69145    | 0.27220     | -1148.46338 | -1149.21535    | -1149.22234        |
| <sup>3</sup> [Fe <sup>III</sup> -OH(Corrole <sup>++</sup> )] | -1148.70978    | 0.27219     | -1148.48328 | -1149.23655    | -1149.24296        |
| <sup>5</sup> [Fe <sup>III</sup> -OH(Corrole <sup>++</sup> )] | -1148.69754    | 0.27090     | -1148.47285 | -1149.22551    | -1149.23340        |

**Table S2.** Relative energies for isolated reactants and intermediates optimized geometries on UB3LYP/B1. UB3LYP/B2 single points and also solvent single points obtained from UB3LYP/B2//UB3LYP/B1.

| Substrate                                                    | $\Delta(E+ZPE)$<br><b>B1</b> | $\Delta(E+ZPE)$<br><b>B2</b> | $\Delta(E_{\text{Solvent}}+ZPE)$<br><b>B2</b> | $\Delta G$<br><b>B2</b> | $\Delta G+E_{\text{Solv}}$<br><b>B2</b> |
|--------------------------------------------------------------|------------------------------|------------------------------|-----------------------------------------------|-------------------------|-----------------------------------------|
| <sup>2</sup> [Fe <sup>IV</sup> =O(Corrole <sup>++</sup> )]   | 0.58                         | 0.51                         | 0.63                                          | 0.90                    | 1.02                                    |
| <sup>4</sup> [Fe <sup>IV</sup> =O(Corrole <sup>++</sup> )]   | 0.00                         | 0.00                         | 0.00                                          | 0.00                    | 0.00                                    |
| <sup>1</sup> [Fe <sup>IV</sup> =O(Corrole)] <sup>-</sup>     | 0.00                         | 0.00                         | 0.00                                          | 0.00                    | 0.00                                    |
| <sup>3</sup> [Fe <sup>IV</sup> =O(Corrole)] <sup>-</sup>     | -27.44                       | -27.63                       | -27.80                                        | -28.25                  | -28.42                                  |
| <sup>1</sup> [Fe <sup>IV</sup> -OH(Corrole)]                 | 0.00                         | 0.00                         | 0.00                                          | 0.00                    | 0.00                                    |
| <sup>1</sup> [Fe <sup>III</sup> -OH(Corrole <sup>++</sup> )] | -14.14                       | -13.49                       | -15.78                                        | -13.94                  | -16.23                                  |
| <sup>3</sup> [Fe <sup>III</sup> -OH(Corrole <sup>++</sup> )] | -25.65                       | -26.80                       | -28.72                                        | -28.24                  | -30.16                                  |
| <sup>5</sup> [Fe <sup>III</sup> -OH(Corrole <sup>++</sup> )] | -18.78                       | -20.68                       | -23.54                                        | -22.44                  | -25.29                                  |

**Table S3.** Group spin densities and charges for isolated reactants and intermediates optimized geometries on UB3LYP/B1. UB3LYP/B2 single points and also solvent single points obtained from UB3LYP/B2//UB3LYP/B1.

|                                                                 | Basis set | Source file | $\rho_{\text{Fe}}$         | $\rho_{\text{O}}$          | $\rho_{\text{Corrole}}$          | $\rho_{\text{Total}}$         | $Q_{\text{Fe}}$         | $Q_{\text{O}}$           | $Q_{\text{Corrole}}$          | $Q_{\text{Total}}$         |
|-----------------------------------------------------------------|-----------|-------------|----------------------------|----------------------------|----------------------------------|-------------------------------|-------------------------|--------------------------|-------------------------------|----------------------------|
| $^2[\text{Fe}^{\text{IV}}=\text{O}(\text{Corrole}^{*\cdot})]$   | LACVP     | Freq        | 1.14                       | 0.78                       | -0.92                            | 1.00                          | 0.75                    | -0.33                    | -0.42                         | 0.00                       |
|                                                                 | LACV3P+*  | SPE         | 1.23                       | 0.77                       | -0.99                            | 1.00                          | 0.31                    | -0.24                    | -0.07                         | 0.00                       |
|                                                                 | LACV3P+*  | Solvent     | 1.32                       | 0.66                       | -0.98                            | 1.00                          | 0.41                    | -0.45                    | 0.04                          | 0.00                       |
| $^4[\text{Fe}^{\text{IV}}=\text{O}(\text{Corrole}^{*\cdot})]$   | LACVP     | Freq        | 1.23                       | 0.81                       | 0.97                             | 3.00                          | 0.75                    | -0.34                    | -0.41                         | 0.00                       |
|                                                                 | LACV3P+*  | SPE         | 1.27                       | 0.79                       | 0.93                             | 3.00                          | 0.30                    | -0.25                    | -0.05                         | 0.00                       |
|                                                                 | LACV3P+*  | Solvent     | 1.39                       | 0.68                       | 0.93                             | 3.00                          | 0.39                    | -0.47                    | 0.07                          | 0.00                       |
| $^1[\text{Fe}^{\text{IV}}=\text{O}(\text{Corrole})]^-$          | LACVP     | Freq        | 0.00                       | 0.00                       | 0.00                             | 0.00                          | 0.67                    | -0.41                    | -1.26                         | -1.00                      |
|                                                                 | LACV3P+*  | SPE         | 0.00                       | 0.00                       | 0.00                             | 0.00                          | 0.30                    | -0.34                    | -0.96                         | -1.00                      |
|                                                                 | LACV3P+*  | Solvent     | 0.00                       | 0.00                       | 0.00                             | 0.00                          | 0.41                    | -0.58                    | -0.83                         | -1.00                      |
| $^3[\text{Fe}^{\text{IV}}=\text{O}(\text{Corrole})]^-$          | LACVP     | Freq        | 1.26                       | 0.74                       | 0.01                             | 2.00                          | 0.71                    | -0.40                    | -1.31                         | -1.00                      |
|                                                                 | LACV3P+*  | SPE         | 1.31                       | 0.73                       | -0.05                            | 2.00                          | 0.31                    | -0.38                    | -0.92                         | -1.00                      |
|                                                                 | LACV3P+*  | Solvent     | 1.47                       | 0.60                       | -0.06                            | 2.00                          | 0.41                    | -0.63                    | -0.78                         | -1.00                      |
| $^1\text{Fe}^{\text{IV}}-\text{OH}(\text{Corrole})$             | LACVP     | Freq        | $\rho_{\text{Fe}}$<br>0.05 | $\rho_{\text{OH}}$<br>0.05 | $\rho_{\text{Corrole}}$<br>-0.10 | $\rho_{\text{Total}}$<br>0.00 | $Q_{\text{Fe}}$<br>0.80 | $Q_{\text{OH}}$<br>-0.19 | $Q_{\text{Corrole}}$<br>-0.61 | $Q_{\text{Total}}$<br>0.00 |
|                                                                 | LACV3P+*  | SPE         | 0.03                       | 0.04                       | -0.07                            | 0.00                          | 0.29                    | 0.12                     | -0.41                         | 0.00                       |
|                                                                 | LACV3P+*  | Solvent     | 0.02                       | 0.04                       | -0.06                            | 0.00                          | 0.37                    | 0.06                     | -0.42                         | 0.00                       |
| $^1[\text{Fe}^{\text{III}}-\text{OH}(\text{Corrole}^{*\cdot})]$ | LACVP     | Freq        | 0.90                       | 0.05                       | -0.95                            | 0.00                          | 0.76                    | -0.24                    | -0.52                         | 0.00                       |
|                                                                 | LACV3P+*  | SPE         | 0.96                       | 0.06                       | -1.02                            | 0.00                          | 0.20                    | -0.10                    | -0.10                         | 0.00                       |
|                                                                 | LACV3P+*  | Solvent     | 0.97                       | 0.05                       | -1.02                            | 0.00                          | 0.35                    | -0.21                    | -0.14                         | 0.00                       |
| $^3[\text{Fe}^{\text{III}}-\text{OH}(\text{Corrole}^{*\cdot})]$ | LACVP     | Freq        | 2.42                       | 0.29                       | -0.72                            | 2.00                          | 0.88                    | -0.31                    | -0.57                         | 0.00                       |
|                                                                 | LACV3P+*  | SPE         | 2.56                       | 0.27                       | -0.84                            | 2.00                          | 0.03                    | -0.27                    | 0.24                          | 0.00                       |
|                                                                 | LACV3P+*  | Solvent     | 2.61                       | 0.25                       | -0.86                            | 2.00                          | 0.13                    | -0.38                    | 0.25                          | 0.00                       |
| $^5[\text{Fe}^{\text{III}}-\text{OH}(\text{Corrole}^{*\cdot})]$ | LACVP     | Freq        | 2.54                       | 0.40                       | 1.06                             | 4.00                          | 0.89                    | -0.34                    | -0.54                         | 0.00                       |
|                                                                 | LACV3P+*  | SPE         | 2.66                       | 0.36                       | 0.98                             | 4.00                          | 0.11                    | -0.34                    | 0.23                          | 0.00                       |
|                                                                 | LACV3P+*  | Solvent     | 2.71                       | 0.30                       | 0.99                             | 4.00                          | 0.21                    | -0.46                    | 0.25                          | 0.00                       |

**Table S4.** Absolute energies, zero-point energies, free energies of UB3LYP/B1 for all substrates discussed in the text. UB3LYP/B2 single points and also solvent single points obtained from UB3LYP/B2//UB3LYP/B1.

| Substrate                               |                  | E (B1)<br>(au) | ZPE<br>(au) | G<br>(au)  | E (B2)<br>(au) | Esolvent<br>(B2) |
|-----------------------------------------|------------------|----------------|-------------|------------|----------------|------------------|
| Ethane                                  | SubH             | -79.81274      | 0.07565     | -79.76021  | -79.84832      | -79.83959        |
|                                         | Sub <sup>•</sup> | -79.14113      | 0.06000     | -79.10537  | -79.17734      | -79.16991        |
| Propane<br>(2 <sup>o</sup> carbon atom) | SubH             | -119.11686     | 0.10473     | -119.03780 | -119.17037     | -119.16085       |
|                                         | Sub <sup>•</sup> | -118.45181     | 0.08902     | -118.39010 | -118.50547     | -118.49637       |
| Toluene (aliphatic)                     | SubH             | -271.50698     | 0.12957     | -271.40750 | -271.62581     | -271.62129       |
|                                         | Sub <sup>•</sup> | -270.85619     | 0.11613     | -270.76970 | -270.97479     | -270.97190       |
| Propene                                 | SubH             | -117.88244     | 0.08063     | -117.82680 | -117.93606     | -117.92897       |
|                                         | Sub <sup>•</sup> | -117.23638     | 0.06691     | -117.19460 | -117.28939     | -117.28391       |
| Ethylbenzene (Benzyl hydrogen)          | SubH             | -310.81080     | 0.15868     | -310.68430 | -310.94731     | -310.94151       |
|                                         | Sub <sup>•</sup> | -310.16501     | 0.14454     | -310.05290 | -310.30081     | -310.29591       |
| Indene                                  | SubH             | -347.68328     | 0.14226     | -347.57140 | -347.83728     | -347.83533       |
|                                         | Sub <sup>•</sup> | -347.05017     | 0.12934     | -346.95170 | -347.20358     | -347.20275       |
| 9,10-Dihydroanthracene                  | SubH             | -540.61242     | 0.21959     | -540.42850 | -540.84866     | -540.84601       |
|                                         | Sub <sup>•</sup> | -539.98391     | 0.20613     | -539.81490 | -540.21798     | -540.21620       |
| 1,4-Cyclohexadiene                      | SubH             | -233.36467     | 0.12348     | -233.26970 | -233.47119     | -233.46799       |
|                                         | Sub <sup>•</sup> | -232.74133     | 0.11004     | -232.66000 | -232.84564     | -232.84376       |
| 10-methyl-9,10-dihydroacridine          | SubH             | -595.93840     | 0.23652     | -595.73870 | -596.20837     | -596.20333       |
|                                         | Sub <sup>•</sup> | -595.31811     | 0.22388     | -595.13150 | -595.58568     | -595.58196       |
| 9,10-dihydroacridine                    | SubH             | -556.64630     | 0.20784     | -556.47260 | -556.89630     | -556.90008       |
|                                         | Sub <sup>•</sup> | -556.02780     | 0.19538     | -555.86790 | -556.27618     | -556.28174       |

**Table S5.** Bond dissociation energies for different substrates used in the text. UB3LYP/B2 single points and also solvent single points obtained from UB3LYP/B2//UB3LYP/B1.

| Substrate                       | $\Delta E$ (B1)<br>LACVP | $\Delta(E+ZPE)$<br>(B1)<br>LACVP | $\Delta E$ (B2)<br>LACV3P+* | $\Delta(E+ZPE)$<br>(B2)<br>LACV3P+* | $\Delta E_{\text{Solvent}}$<br>LACV3P+* | $\Delta(E_{\text{Solvent}}+ZPE)$<br>LACV3P+* |
|---------------------------------|--------------------------|----------------------------------|-----------------------------|-------------------------------------|-----------------------------------------|----------------------------------------------|
| Ethane                          | 107.51                   | 97.69                            | 105.94                      | 96.12                               | 105.08                                  | 95.26                                        |
| Propane (2 <sup>o</sup> carbon) | 103.40                   | 93.54                            | 102.12                      | 92.26                               | 101.83                                  | 91.96                                        |
| Toluene                         | 94.45                    | 86.02                            | 93.41                       | 84.98                               | 92.35                                   | 83.92                                        |
| Propene                         | 91.48                    | 82.87                            | 90.69                       | 82.08                               | 89.64                                   | 81.03                                        |
| Ethylbenzene                    | 91.31                    | 82.44                            | 90.58                       | 81.70                               | 89.98                                   | 81.11                                        |
| Indene                          | 83.35                    | 75.24                            | 82.54                       | 74.43                               | 81.81                                   | 73.70                                        |
| 9,10-Dihydroanthracene          | 80.47                    | 72.02                            | 80.65                       | 72.20                               | 80.07                                   | 71.62                                        |
| 1,4-Cyclohexadiene              | 77.23                    | 68.79                            | 77.43                       | 69.00                               | 76.57                                   | 68.13                                        |
| 10-methyl-9,10-dihydroacridine  | 75.31                    | 67.38                            | 75.64                       | 67.71                               | 74.78                                   | 66.85                                        |
| 9,10-dihydroacridine            | 74.19                    | 66.37                            | 74.02                       | 66.20                               | 72.87                                   | 65.05                                        |

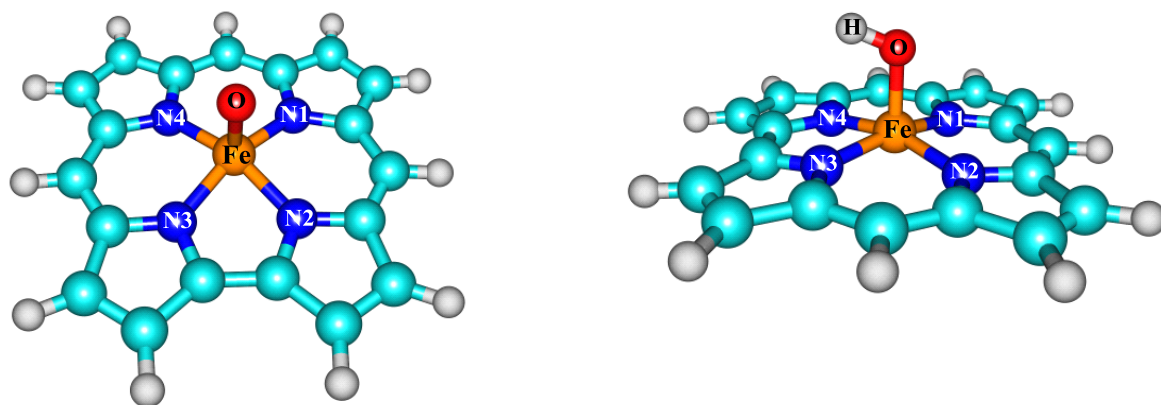

|                                                             | Fe–O   | Fe–N1  | Fe–N2  | Fe–N3  | Fe–N4  | O–H    |
|-------------------------------------------------------------|--------|--------|--------|--------|--------|--------|
| $^2[\text{Fe}^{\text{IV}}=\text{O}(\text{Corrole}^{**})]$   | 1.6337 | 1.9324 | 1.9074 | 1.9075 | 1.9325 |        |
| $^4[\text{Fe}^{\text{IV}}=\text{O}(\text{Corrole}^{**})]$   | 1.6351 | 1.9329 | 1.9075 | 1.9076 | 1.9330 |        |
| $^1[\text{Fe}^{\text{IV}}-\text{OH}(\text{Corrole})]$       | 1.7720 | 1.8958 | 1.9292 | 1.8616 | 1.9332 | 0.9835 |
| $^1[\text{Fe}^{\text{III}}-\text{OH}(\text{Corrole}^{**})]$ | 1.8011 | 1.9358 | 1.9357 | 1.8977 | 1.8974 | 0.9818 |
| $^3[\text{Fe}^{\text{III}}-\text{OH}(\text{Corrole}^{**})]$ | 1.8463 | 1.9425 | 1.9391 | 1.9128 | 1.9113 | 0.9778 |
| $^5[\text{Fe}^{\text{III}}-\text{OH}(\text{Corrole}^{**})]$ | 1.8725 | 1.9571 | 1.9549 | 1.9246 | 1.9216 | 0.9769 |

**Figure S1.** Optimized geometry of  $[\text{Fe}^{\text{IV}}=\text{O}(\text{Corrole}^{**})]$ , and  $[\text{Fe}^{\text{III}}-\text{OH}(\text{Corrole}^{**})]$  as calculated with UB3LYP/B1 in Gaussian. Bond distances are in angstroms.

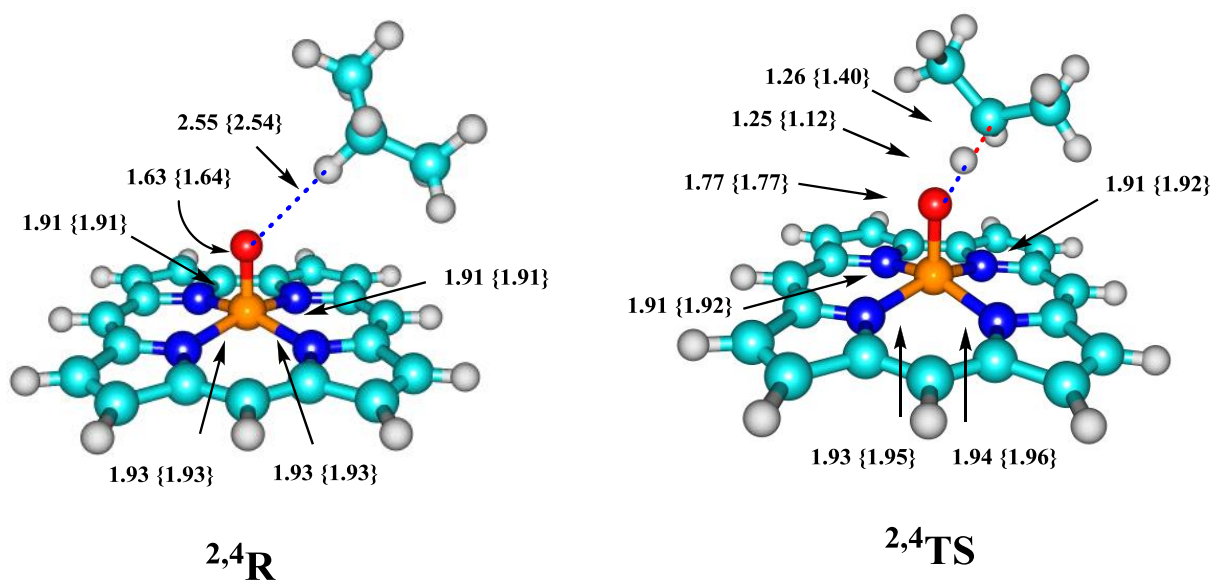

**Figure S2.** Optimized geometry of  $^{2,4}\text{R}_2$ , and  $^{2,4}\text{TS}_2$ , (quartet data in curly brackets) of hydroxylation of propane ( $2^\circ$  carbon atom) as calculated with UB3LYP/B1 in Gaussian. All bond lengths given in angstroms and the value of the imaginary frequency in the transition state in  $\text{cm}^{-1}$ .

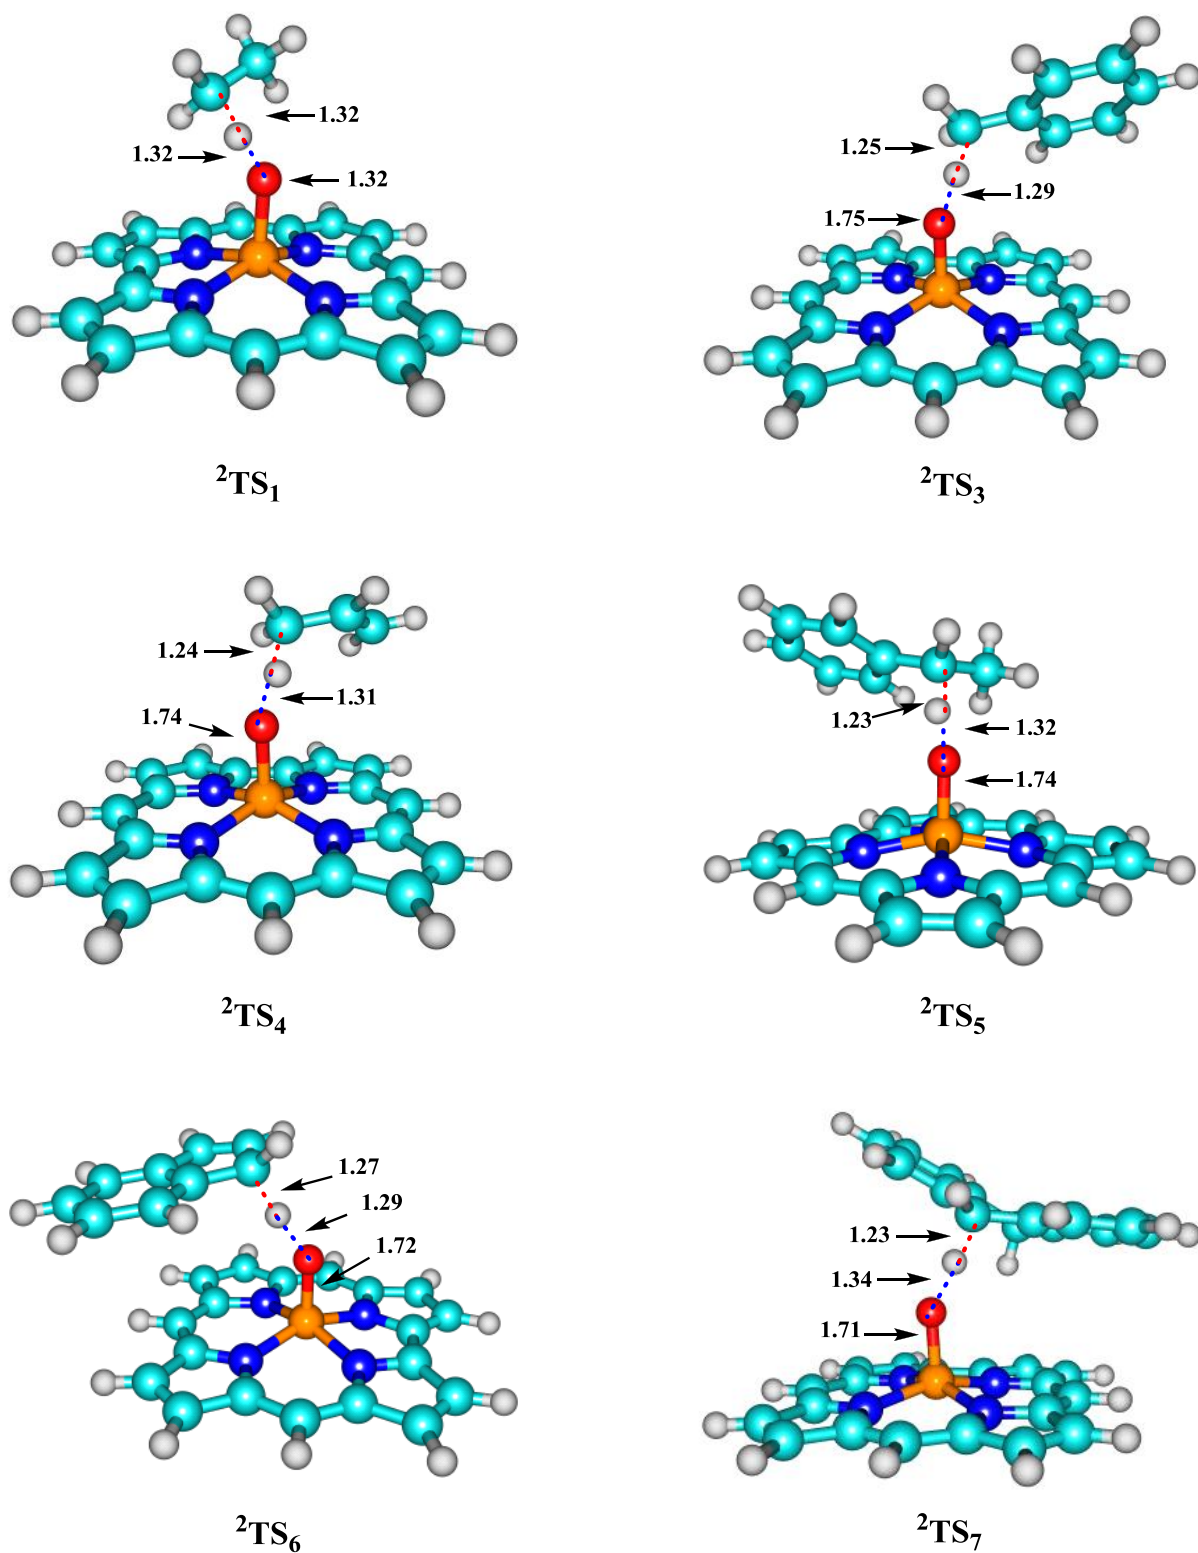

**Figure S3.** Optimized geometry of Transition States for doublet spin state for substrates **1**, and **3–7** as calculated with UB3LYP/B1 in Gaussian. All bond lengths given in angstroms and the value of the imaginary frequency in the transition state in  $\text{cm}^{-1}$ .

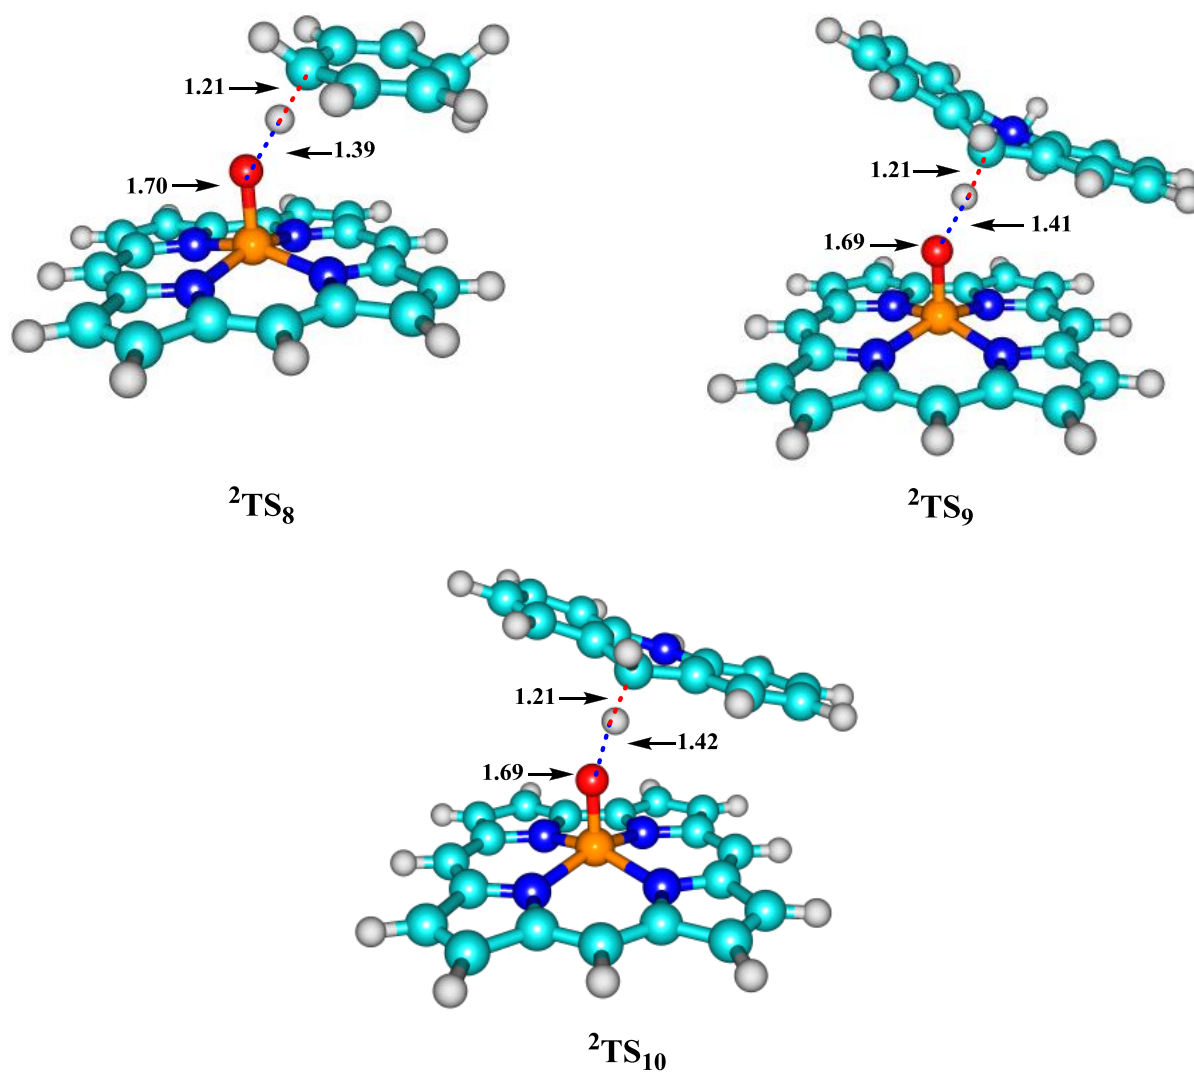

**Figure S4.** Optimized geometry of Transition States on doublet spin state for substrates **8–10** as calculated with UB3LYP/B1 in Gaussian. All bond lengths given in angstroms and the value of the imaginary frequency in the transition state in  $\text{cm}^{-1}$ .



**Table S6.** Absolute energies, zero-point energies, free energies of UB3LYP/B1 for hydroxylation of various substrates by [Fe<sup>IV</sup>(O)(Corrole<sup>+</sup>)]. UB3LYP/B2 single points and also solvent single points obtained from UB3LYP/B2//UB3LYP/B1.

| Substrate                                                                             |                 | E (B1)<br>(au) | ZPE<br>(au) | G<br>(au)   | E (B2)<br>(au) | E+Esolvent<br>(B2) |
|---------------------------------------------------------------------------------------|-----------------|----------------|-------------|-------------|----------------|--------------------|
| Ethane<br><a href="#">i1204.77</a><br><a href="#">i1152.29</a>                        | <sup>2</sup> R  | -1227.87601    | 0.33862     | -1227.59347 | -1228.42951    | -1228.42282        |
|                                                                                       | <sup>4</sup> R  | -1227.87714    | 0.33881     | -1227.59500 | -1228.43054    | -1228.42408        |
|                                                                                       | <sup>2</sup> TS | -1227.84834    | 0.33187     | -1227.56894 | -1228.40135    | -1228.39448        |
|                                                                                       | <sup>4</sup> TS | -1227.83700    | 0.33150     | -1227.55844 | -1228.38937    | -1228.38224        |
| Propane (2° carbon atom)<br><a href="#">i948.82</a><br><a href="#">i1047.89</a>       | <sup>2</sup> R  | -1267.18035    | 0.36746     | -1266.87063 | -1267.75185    | -1267.74298        |
|                                                                                       | <sup>4</sup> R  | -1267.18148    | 0.36762     | -1266.87228 | -1267.75288    | -1267.74430        |
|                                                                                       | <sup>2</sup> TS | -1267.15759    | 0.36109     | -1266.85028 | -1267.72812    | -1267.71623        |
|                                                                                       | <sup>4</sup> TS | -1267.14750    | 0.35872     | -1266.84510 | -1267.71882    | -1267.70276        |
| Toluene (aliphatic)<br><a href="#">i1050.69</a><br><a href="#">i1613.77</a>           | <sup>2</sup> R  | -1419.57303    | 0.39260     | -1419.23931 | -1420.20903    | -1420.20397        |
|                                                                                       | <sup>4</sup> R  | -1419.57420    | 0.39279     | -1419.24091 | -1420.21010    | -1420.20522        |
|                                                                                       | <sup>2</sup> TS | -1419.55041    | 0.38682     | -1419.22050 | -1420.18540    | -1420.17850        |
|                                                                                       | <sup>4</sup> TS | -1419.54227    | 0.38635     | -1419.21379 | -1420.16971    | -1420.16320        |
| Propene (aliphatic)<br><a href="#">i1034.24</a><br><a href="#">i1706.29</a>           | <sup>2</sup> R  | -1265.94738    | 0.34362     | -1265.65992 | -1266.51849    | -1266.51287        |
|                                                                                       | <sup>4</sup> R  | -1265.94854    | 0.34381     | -1265.66142 | -1266.51955    | -1266.51425        |
|                                                                                       | <sup>2</sup> TS | -1265.92547    | 0.33806     | -1265.64024 | -1266.49467    | -1266.48879        |
|                                                                                       | <sup>4</sup> TS | -1265.91807    | 0.33766     | -1265.63357 | -1266.48624    | -1266.47961        |
| Ethylbenzene (benzyl C–H)<br><a href="#">i957.93</a><br><a href="#">i1637.36</a>      | <sup>2</sup> R  | -1458.87687    | 0.42158     | -1458.51752 | -1459.53133    | -1459.51939        |
|                                                                                       | <sup>4</sup> R  | -1458.87788    | 0.42154     | -1458.51862 | -1459.53281    | -1459.52033        |
|                                                                                       | <sup>2</sup> TS | -1458.85547    | 0.41571     | -1458.49887 | -1459.50789    | -1459.49751        |
|                                                                                       | <sup>4</sup> TS | -1458.84780    | 0.41514     | -1458.49182 | -1459.49926    | -1459.48837        |
| Indene<br><a href="#">i1431.27</a><br><a href="#">i1735.32</a>                        | <sup>2</sup> R  | -1495.74979    | 0.40502     | -1495.40370 | -1496.42169    | -1496.41615        |
|                                                                                       | <sup>4</sup> R  | -1495.75097    | 0.40522     | -1495.40535 | -1496.42278    | -1496.41755        |
|                                                                                       | <sup>2</sup> TS | -1495.73118    | 0.39896     | -1495.38909 | -1496.40099    | -1496.39394        |
|                                                                                       | <sup>4</sup> TS | -1495.72687    | 0.39914     | -1495.38435 | -1496.39618    | -1496.39061        |
| 9,10–Dihydroanthracene<br><a href="#">i1121.39</a><br><a href="#">i1659.51</a>        | <sup>2</sup> R  | -1688.67913    | 0.48242     | -1688.26086 | -1689.43308    | -1689.42603        |
|                                                                                       | <sup>4</sup> R  | -1688.68031    | 0.48261     | -1688.26249 | -1689.43416    | -1689.42740        |
|                                                                                       | <sup>2</sup> TS | -1688.66482    | 0.47672     | -1688.25000 | -1689.41714    | -1689.40478        |
|                                                                                       | <sup>4</sup> TS | -1688.65961    | 0.47648     | -1688.24524 | -1689.41112    | -1689.39847        |
| 1,4–Cyclohexadiene<br><a href="#">i943.62</a><br><a href="#">i1539.16</a>             | <sup>2</sup> R  | -1381.42957    | 0.38628     | -1381.10230 | -1382.05403    | -1382.04855        |
|                                                                                       | <sup>4</sup> R  | -1381.43073    | 0.38647     | -1381.10388 | -1382.05508    | -1382.05026        |
|                                                                                       | <sup>2</sup> TS | -1381.41687    | 0.38135     | -1381.09085 | -1382.03881    | -1382.03255        |
|                                                                                       | <sup>4</sup> TS | -1381.41247    | 0.38074     | -1381.08719 | -1382.03329    | -1382.02765        |
| 10–methyl–9,10–dihydroacridine<br><a href="#">i758.56</a><br><a href="#">i1355.17</a> | <sup>2</sup> R  | -1744.00628    | 0.49949     | -1743.57107 | -1744.79368    | -1744.78074        |
|                                                                                       | <sup>4</sup> R  | -1744.00743    | 0.49970     | -1743.57265 | -1744.79476    | -1744.78169        |
|                                                                                       | <sup>2</sup> TS | -1743.99762    | 0.49499     | -1743.56531 | -1744.78303    | -1744.77194        |
|                                                                                       | <sup>4</sup> TS | -1743.99398    | 0.49445     | -1743.56278 | -1744.77873    | -1744.76733        |
| 9,10–dihydroacridine<br><a href="#">i778.06</a><br><a href="#">i1391.07</a>           | <sup>2</sup> R  | -1704.71410    | 0.47094     | -1704.30659 | -1705.48219    | -1705.47783        |
|                                                                                       | <sup>4</sup> R  | -1704.71525    | 0.47115     | -1704.30809 | -1705.48328    | -1705.47903        |
|                                                                                       | <sup>2</sup> TS | -1704.70577    | 0.46669     | -1704.30012 | -1705.47213    | -1705.47014        |
|                                                                                       | <sup>4</sup> TS | -1704.70194    | 0.46607     | -1704.29752 | -1705.46762    | -1705.46673        |

**Table S7.** Relative energies for hydrogen atom abstraction of various substrates by  $^{2,4}\text{[Fe}^{\text{IV}}(\text{O})(\text{Corrole}^+)]$ .  
 UB3LYP/B2 single points and also solvent single points obtained from UB3LYP/B2//UB3LYP/B1.

| Substrate                      |                 | $\Delta E$ (B1)<br>LACVP | $\Delta(E+ZPE)$<br>(B1)<br>LACVP | $\Delta E$ (B2)<br>LACV3P+* | $\Delta(E+ZPE)$<br>(B2)<br>LACV3P+* | $\Delta E_{\text{Solvent}}$<br>LACV3P+* | $\Delta(E_{\text{Solvent}}+ZPE)$<br>LACV3P+* | $\Delta G$<br>LACVP | $\Delta G$<br>LACV3P+* | $\Delta G+E_{\text{Solvent}}$<br>LACV3P+* |
|--------------------------------|-----------------|--------------------------|----------------------------------|-----------------------------|-------------------------------------|-----------------------------------------|----------------------------------------------|---------------------|------------------------|-------------------------------------------|
| Ethane                         | <sup>2</sup> R  | 0.71                     | 0.59                             | 0.64                        | 0.52                                | 0.79                                    | 0.67                                         | 0.96                | 0.90                   | 1.05                                      |
|                                | <sup>4</sup> R  | 0.00                     | 0.00                             | 0.00                        | 0.00                                | 0.00                                    | 0.00                                         | 0.00                | 0.00                   | 0.00                                      |
|                                | <sup>2</sup> TS | 18.07                    | 13.72                            | 18.31                       | 13.96                               | 18.57                                   | 14.22                                        | 16.35               | 16.59                  | 16.85                                     |
|                                | <sup>4</sup> TS | 25.19                    | 20.60                            | 25.83                       | 21.25                               | 26.26                                   | 21.67                                        | 22.94               | 23.59                  | 24.01                                     |
| Propane                        | <sup>2</sup> R  | 0.71                     | 0.61                             | 0.65                        | 0.54                                | 0.83                                    | 0.73                                         | 1.03                | 0.97                   | 1.15                                      |
|                                | <sup>4</sup> R  | 0.00                     | 0.00                             | 0.00                        | 0.00                                | 0.00                                    | 0.00                                         | 0.00                | 0.00                   | 0.00                                      |
|                                | <sup>2</sup> TS | 15.00                    | 10.90                            | 15.54                       | 11.44                               | 17.62                                   | 13.52                                        | 13.80               | 14.35                  | 16.43                                     |
|                                | <sup>4</sup> TS | 21.33                    | 15.74                            | 21.37                       | 15.79                               | 26.07                                   | 20.48                                        | 17.06               | 17.10                  | 21.80                                     |
| Toluene                        | <sup>2</sup> R  | 0.74                     | 0.61                             | 0.67                        | 0.55                                | 0.78                                    | 0.66                                         | 1.00                | 0.94                   | 1.05                                      |
|                                | <sup>4</sup> R  | 0.00                     | 0.00                             | 0.00                        | 0.00                                | 0.00                                    | 0.00                                         | 0.00                | 0.00                   | 0.00                                      |
|                                | <sup>2</sup> TS | 14.93                    | 11.18                            | 15.50                       | 11.75                               | 16.76                                   | 13.01                                        | 12.81               | 13.38                  | 14.64                                     |
|                                | <sup>4</sup> TS | 20.04                    | 16.00                            | 25.35                       | 21.30                               | 26.36                                   | 22.32                                        | 17.02               | 22.33                  | 23.34                                     |
| Propene                        | <sup>2</sup> R  | 0.72                     | 0.60                             | 0.66                        | 0.54                                | 0.87                                    | 0.75                                         | 0.94                | 0.88                   | 1.08                                      |
|                                | <sup>4</sup> R  | 0.00                     | 0.00                             | 0.00                        | 0.00                                | 0.00                                    | 0.00                                         | 0.00                | 0.00                   | 0.00                                      |
|                                | <sup>2</sup> TS | 14.47                    | 10.86                            | 15.61                       | 12.00                               | 15.97                                   | 12.37                                        | 13.29               | 14.43                  | 14.79                                     |
|                                | <sup>4</sup> TS | 19.12                    | 15.26                            | 20.90                       | 17.04                               | 21.74                                   | 17.88                                        | 17.47               | 19.26                  | 20.09                                     |
| Ethylbenzene                   | <sup>2</sup> R  | 0.64                     | 0.66                             | 0.93                        | 0.95                                | 0.59                                    | 0.61                                         | 0.69                | 0.98                   | 0.64                                      |
|                                | <sup>4</sup> R  | 0.00                     | 0.00                             | 0.00                        | 0.00                                | 0.00                                    | 0.00                                         | 0.00                | 0.00                   | 0.00                                      |
|                                | <sup>2</sup> TS | 14.06                    | 10.41                            | 15.64                       | 11.98                               | 14.32                                   | 10.66                                        | 12.40               | 13.97                  | 12.65                                     |
|                                | <sup>4</sup> TS | 18.88                    | 14.86                            | 21.06                       | 17.04                               | 20.06                                   | 16.04                                        | 16.82               | 19.00                  | 18.00                                     |
| Indene                         | <sup>2</sup> R  | 0.74                     | 0.62                             | 0.69                        | 0.56                                | 0.88                                    | 0.76                                         | 1.04                | 0.98                   | 1.18                                      |
|                                | <sup>4</sup> R  | 0.00                     | 0.00                             | 0.00                        | 0.00                                | 0.00                                    | 0.00                                         | 0.00                | 0.00                   | 0.00                                      |
|                                | <sup>2</sup> TS | 12.42                    | 8.49                             | 13.68                       | 9.75                                | 14.82                                   | 10.89                                        | 10.21               | 11.47                  | 12.61                                     |
|                                | <sup>4</sup> TS | 15.12                    | 11.31                            | 16.70                       | 12.88                               | 16.91                                   | 13.09                                        | 13.18               | 14.75                  | 14.96                                     |
| 9,10-Dihydroanthracene         | <sup>2</sup> R  | 0.74                     | 0.62                             | 0.68                        | 0.56                                | 0.86                                    | 0.74                                         | 1.03                | 0.97                   | 1.15                                      |
|                                | <sup>4</sup> R  | 0.00                     | 0.00                             | 0.00                        | 0.00                                | 0.00                                    | 0.00                                         | 0.00                | 0.00                   | 0.00                                      |
|                                | <sup>2</sup> TS | 9.72                     | 6.03                             | 10.68                       | 6.98                                | 14.20                                   | 10.50                                        | 7.84                | 8.80                   | 12.31                                     |
|                                | <sup>4</sup> TS | 12.99                    | 9.15                             | 14.46                       | 10.61                               | 18.16                                   | 14.31                                        | 10.82               | 12.29                  | 15.99                                     |
| 1,4-Cyclohexadiene             | <sup>2</sup> R  | 0.73                     | 0.61                             | 0.66                        | 0.54                                | 1.07                                    | 0.95                                         | 0.99                | 0.92                   | 1.33                                      |
|                                | <sup>4</sup> R  | 0.00                     | 0.00                             | 0.00                        | 0.00                                | 0.00                                    | 0.00                                         | 0.00                | 0.00                   | 0.00                                      |
|                                | <sup>2</sup> TS | 8.70                     | 5.49                             | 10.21                       | 7.00                                | 11.11                                   | 7.90                                         | 8.17                | 9.68                   | 10.58                                     |
|                                | <sup>4</sup> TS | 11.46                    | 7.86                             | 13.67                       | 10.08                               | 14.19                                   | 10.59                                        | 10.47               | 12.68                  | 13.20                                     |
| 10-methyl-9,10-dihydroacridine | <sup>2</sup> R  | 0.72                     | 0.59                             | 0.68                        | 0.55                                | 0.60                                    | 0.46                                         | 0.99                | 0.95                   | 0.86                                      |
|                                | <sup>4</sup> R  | 0.00                     | 0.00                             | 0.00                        | 0.00                                | 0.00                                    | 0.00                                         | 0.00                | 0.00                   | 0.00                                      |
|                                | <sup>2</sup> TS | 6.16                     | 3.20                             | 7.36                        | 4.41                                | 6.11                                    | 3.16                                         | 4.61                | 5.82                   | 4.57                                      |
|                                | <sup>4</sup> TS | 8.44                     | 5.15                             | 10.06                       | 6.77                                | 9.01                                    | 5.72                                         | 6.19                | 7.81                   | 6.77                                      |
| 9,10-dihydroacridine           | <sup>2</sup> R  | 0.72                     | 0.59                             | 0.68                        | 0.55                                | 0.76                                    | 0.62                                         | 0.94                | 0.91                   | 0.98                                      |
|                                | <sup>4</sup> R  | 0.00                     | 0.00                             | 0.00                        | 0.00                                | 0.00                                    | 0.00                                         | 0.00                | 0.00                   | 0.00                                      |
|                                | <sup>2</sup> TS | 5.95                     | 3.15                             | 7.00                        | 4.20                                | 5.58                                    | 2.78                                         | 5.00                | 6.05                   | 4.63                                      |
|                                | <sup>4</sup> TS | 8.35                     | 5.17                             | 9.83                        | 6.64                                | 7.72                                    | 4.54                                         | 6.64                | 8.11                   | 6.00                                      |

**Table S8.** Group spin densities and charges of UB3LYP/B1 optimized geometries of reactant complex for hydroxylation of different substrates by  $^{2,4}\text{[Fe}^{\text{IV}}(\text{O})(\text{Corrole}^+)]$ .

| Substrate                      |                | $\rho_{\text{Fe}}$ | $\rho_{\text{O}}$ | $\rho_{\text{Ligand}}$ | $\rho_{\text{SubH}}$ | $\rho_{\text{Total}}$ | $Q_{\text{Fe}}$ | $Q_{\text{O}}$ | $Q_{\text{Ligand}}$ | $Q_{\text{SubH}}$ | $Q_{\text{Total}}$ |
|--------------------------------|----------------|--------------------|-------------------|------------------------|----------------------|-----------------------|-----------------|----------------|---------------------|-------------------|--------------------|
| Ethane                         | $^2\mathbf{R}$ | 1.15               | 0.76              | -0.92                  | 0.00                 | 1.00                  | 0.76            | -0.34          | -0.42               | 0.00              | 0.00               |
|                                | $^4\mathbf{R}$ | 1.24               | 0.79              | 0.96                   | 0.00                 | 3.00                  | 0.76            | -0.35          | -0.41               | 0.00              | 0.00               |
| Propane                        | $^2\mathbf{R}$ | 1.15               | 0.76              | -0.92                  | 0.00                 | 1.00                  | 0.76            | -0.34          | -0.41               | 0.00              | 0.00               |
|                                | $^4\mathbf{R}$ | 1.24               | 0.79              | 0.96                   | 0.00                 | 3.00                  | 0.75            | -0.35          | -0.40               | 0.00              | 0.00               |
| Toluene                        | $^2\mathbf{R}$ | 1.16               | 0.75              | -0.91                  | 0.00                 | 1.00                  | 0.76            | -0.35          | -0.42               | 0.01              | 0.00               |
|                                | $^4\mathbf{R}$ | 1.26               | 0.78              | 0.96                   | 0.00                 | 3.00                  | 0.76            | -0.36          | -0.41               | 0.01              | 0.00               |
| Propene                        | $^2\mathbf{R}$ | 1.16               | 0.75              | -0.91                  | 0.00                 | 1.00                  | 0.76            | -0.35          | -0.41               | 0.00              | 0.00               |
|                                | $^4\mathbf{R}$ | 1.25               | 0.78              | 0.96                   | 0.00                 | 3.00                  | 0.76            | -0.35          | -0.40               | 0.00              | 0.00               |
| Ethylbenzene                   | $^2\mathbf{R}$ | 1.17               | 0.74              | -0.92                  | 0.00                 | 1.00                  | 0.77            | -0.36          | -0.40               | -0.01             | 0.00               |
|                                | $^4\mathbf{R}$ | 1.26               | 0.78              | 0.96                   | 0.00                 | 3.00                  | 0.76            | -0.36          | -0.39               | -0.01             | 0.00               |
| Indene                         | $^2\mathbf{R}$ | 1.17               | 0.74              | -0.91                  | 0.00                 | 1.00                  | 0.77            | -0.36          | -0.41               | 0.00              | 0.00               |
|                                | $^4\mathbf{R}$ | 1.27               | 0.77              | 0.96                   | 0.01                 | 3.00                  | 0.76            | -0.37          | -0.40               | 0.00              | 0.00               |
| 9,10-Dihydroanthracene         | $^2\mathbf{R}$ | 1.17               | 0.75              | -0.91                  | 0.00                 | 1.00                  | 0.76            | -0.35          | -0.41               | 0.00              | 0.00               |
|                                | $^4\mathbf{R}$ | 1.26               | 0.77              | 0.96                   | 0.00                 | 3.00                  | 0.76            | -0.36          | -0.40               | 0.00              | 0.00               |
| 1,4-Cyclohexadiene             | $^2\mathbf{R}$ | 1.16               | 0.75              | -0.91                  | 0.00                 | 1.00                  | 0.76            | -0.35          | -0.41               | 0.00              | 0.00               |
|                                | $^4\mathbf{R}$ | 1.26               | 0.78              | 0.96                   | 0.00                 | 3.00                  | 0.76            | -0.36          | -0.40               | 0.00              | 0.00               |
| 10-methyl-9,10-dihydroacridine | $^2\mathbf{R}$ | 1.19               | 0.72              | -0.88                  | -0.03                | 1.00                  | 0.79            | -0.37          | -0.44               | 0.02              | 0.00               |
|                                | $^4\mathbf{R}$ | 1.28               | 0.76              | 0.93                   | 0.03                 | 3.00                  | 0.78            | -0.37          | -0.42               | 0.01              | 0.00               |
| 9,10-dihydroacridine           | $^2\mathbf{R}$ | 1.19               | 0.73              | -0.89                  | -0.03                | 1.00                  | 0.79            | -0.37          | -0.44               | 0.02              | 0.00               |
|                                | $^4\mathbf{R}$ | 1.28               | 0.76              | 0.94                   | 0.03                 | 3.00                  | 0.78            | -0.37          | -0.42               | 0.01              | 0.00               |

**Table S9.** Group spin densities and charges of UB3LYP/B1 optimized geometries of transition states for hydrogen abstraction from different substrates by  $^{2,4}\text{[Fe}^{\text{IV}}(\text{O})(\text{Corrole}^*)]$ .

| Substrate                      |               | $\rho_{\text{Fe}}$ | $\rho_{\text{OH}}$ | $\rho_{\text{Ligand}}$ | $\rho_{\text{Sub.}}$ | $\rho_{\text{Total}}$ | $Q_{\text{Fe}}$ | $Q_{\text{OH}}$ | $Q_{\text{Ligand}}$ | $Q_{\text{Sub.}}$ | $Q_{\text{Total}}$ |
|--------------------------------|---------------|--------------------|--------------------|------------------------|----------------------|-----------------------|-----------------|-----------------|---------------------|-------------------|--------------------|
| Ethane                         | $^2\text{TS}$ | 2.27               | -0.05              | -0.68                  | -0.54                | 1.00                  | 0.87            | -0.24           | -0.61               | -0.03             | 0.00               |
|                                | $^4\text{TS}$ | 1.10               | 0.44               | 0.83                   | 0.64                 | 3.00                  | 0.80            | -0.21           | -0.56               | -0.04             | 0.00               |
| Propane                        | $^2\text{TS}$ | 2.23               | -0.11              | -0.66                  | -0.46                | 1.00                  | 0.87            | -0.23           | -0.61               | -0.02             | 0.00               |
|                                | $^4\text{TS}$ | 2.35               | 0.22               | 1.02                   | -0.59                | 3.00                  | 0.89            | -0.29           | -0.56               | -0.04             | 0.00               |
| Toluene                        | $^2\text{TS}$ | 2.15               | -0.01              | -0.71                  | -0.43                | 1.00                  | 0.86            | -0.21           | -0.58               | -0.07             | 0.00               |
|                                | $^4\text{TS}$ | 1.23               | 0.47               | 0.76                   | 0.53                 | 3.00                  | 0.82            | -0.18           | -0.56               | -0.08             | 0.00               |
| Propene                        | $^2\text{TS}$ | 2.13               | 0.00               | -0.72                  | -0.41                | 1.00                  | 0.86            | -0.21           | -0.57               | -0.07             | 0.00               |
|                                | $^4\text{TS}$ | 1.21               | 0.49               | 0.78                   | 0.51                 | 3.00                  | 0.82            | -0.18           | -0.55               | -0.09             | 0.00               |
| Ethylbenzene                   | $^2\text{TS}$ | 2.10               | 0.05               | -0.76                  | -0.39                | 1.00                  | 0.86            | -0.21           | -0.57               | -0.08             | 0.00               |
|                                | $^4\text{TS}$ | 1.29               | 0.48               | 0.74                   | 0.49                 | 3.00                  | 0.83            | -0.20           | -0.57               | -0.06             | 0.00               |
| Indene                         | $^2\text{TS}$ | 1.99               | 0.16               | -0.78                  | -0.38                | 1.00                  | 0.86            | -0.19           | -0.52               | -0.15             | 0.00               |
|                                | $^4\text{TS}$ | 1.49               | 0.45               | 0.67                   | 0.39                 | 3.00                  | 0.85            | -0.16           | -0.51               | -0.18             | 0.00               |
| 9,10-Dihydroanthracene         | $^2\text{TS}$ | 1.95               | 0.20               | -0.79                  | -0.36                | 1.00                  | 0.85            | -0.18           | -0.55               | -0.12             | 0.00               |
|                                | $^4\text{TS}$ | 1.44               | 0.49               | 0.67                   | 0.39                 | 3.00                  | 0.84            | -0.17           | -0.57               | -0.09             | 0.00               |
| 1,4-Cyclohexadiene             | $^2\text{TS}$ | 1.90               | 0.19               | -0.75                  | -0.34                | 1.00                  | 0.84            | -0.18           | -0.57               | -0.09             | 0.00               |
|                                | $^4\text{TS}$ | 1.44               | 0.54               | 0.63                   | 0.39                 | 3.00                  | 0.83            | -0.17           | -0.60               | -0.07             | 0.00               |
| 10-methyl-9,10-dihydroacridine | $^2\text{TS}$ | 1.80               | 0.28               | -0.64                  | -0.45                | 1.00                  | 0.83            | -0.16           | -0.67               | 0.00              | 0.00               |
|                                | $^4\text{TS}$ | 1.53               | 0.52               | 0.47                   | 0.48                 | 3.00                  | 0.84            | -0.16           | -0.71               | 0.04              | 0.00               |
| 9,10-dihydroacridine           | $^2\text{TS}$ | 1.80               | 0.27               | -0.63                  | -0.44                | 1.00                  | 0.83            | -0.17           | -0.67               | 0.01              | 0.00               |
|                                | $^4\text{TS}$ | 1.51               | 0.52               | 0.49                   | 0.48                 | 3.00                  | 0.83            | -0.55           | -1.69               | 1.41              | 0.00               |

**Table S10.** Group spin densities and charges (of reactants) of UB3LYP/B2//UB3LYP/B1 single for hydroxylation of different substrates by  $^{2,4}\text{[Fe}^{\text{IV}}(\text{O})(\text{Corrole}^{\text{+}})]$ .

| Substrate                      |                | $\rho_{\text{Fe}}$ | $\rho_{\text{O}}$ | $\rho_{\text{Ligand}}$ | $\rho_{\text{SubH}}$ | $\rho_{\text{Total}}$ | $Q_{\text{Fe}}$ | $Q_{\text{O}}$ | $Q_{\text{Ligand}}$ | $Q_{\text{SubH}}$ | $Q_{\text{Total}}$ |
|--------------------------------|----------------|--------------------|-------------------|------------------------|----------------------|-----------------------|-----------------|----------------|---------------------|-------------------|--------------------|
| Ethane                         | $^2\mathbf{R}$ | 1.24               | 0.76              | -1.00                  | 0.00                 | 1.00                  | 0.01            | -0.17          | 0.20                | -0.03             | 0.00               |
|                                | $^4\mathbf{R}$ | 1.28               | 0.78              | 0.93                   | 0.00                 | 3.00                  | 0.00            | -0.18          | 0.22                | -0.03             | 0.00               |
| Propane                        | $^2\mathbf{R}$ | 1.25               | 0.76              | -1.01                  | 0.00                 | 1.00                  | -0.25           | -0.12          | 0.40                | -0.03             | 0.00               |
|                                | $^4\mathbf{R}$ | 1.28               | 0.78              | 0.93                   | 0.00                 | 3.00                  | -0.26           | -0.13          | 0.42                | -0.03             | 0.00               |
| Toluene                        | $^2\mathbf{R}$ | 1.25               | 0.75              | -1.00                  | 0.00                 | 1.00                  | -0.03           | -0.16          | 0.33                | -0.14             | 0.00               |
|                                | $^4\mathbf{R}$ | 1.30               | 0.77              | 0.93                   | 0.00                 | 3.00                  | -0.04           | -0.17          | 0.36                | -0.14             | 0.00               |
| Propene                        | $^2\mathbf{R}$ | 1.25               | 0.75              | -1.00                  | 0.00                 | 1.00                  | -0.04           | -0.16          | 0.26                | -0.06             | 0.00               |
|                                | $^4\mathbf{R}$ | 1.29               | 0.77              | 0.93                   | 0.00                 | 3.00                  | -0.05           | -0.17          | 0.29                | -0.06             | 0.00               |
| Ethylbenzene                   | $^2\mathbf{R}$ | 1.28               | 0.75              | -1.03                  | 0.00                 | 1.00                  | -0.77           | 0.07           | 0.73                | -0.04             | 0.00               |
|                                | $^4\mathbf{R}$ | 1.29               | 0.78              | 0.93                   | 0.00                 | 3.00                  | -0.81           | 0.28           | 0.57                | -0.05             | 0.00               |
| Indene                         | $^2\mathbf{R}$ | 1.26               | 0.74              | -1.00                  | 0.00                 | 1.00                  | -0.14           | -0.07          | 0.37                | -0.15             | 0.00               |
|                                | $^4\mathbf{R}$ | 1.31               | 0.76              | 0.92                   | 0.01                 | 3.00                  | -0.16           | -0.08          | 0.39                | -0.15             | 0.00               |
| 9,10-Dihydroanthracene         | $^2\mathbf{R}$ | 1.24               | 0.76              | -1.00                  | 0.01                 | 1.00                  | -0.20           | 0.05           | 0.28                | -0.12             | 0.00               |
|                                | $^4\mathbf{R}$ | 1.30               | 0.77              | 0.93                   | 0.00                 | 3.00                  | -0.22           | 0.04           | 0.31                | -0.13             | 0.00               |
| 1,4-Cyclohexadiene             | $^2\mathbf{R}$ | 1.25               | 0.75              | -1.00                  | 0.00                 | 1.00                  | -0.13           | -0.06          | 0.22                | -0.03             | 0.00               |
|                                | $^4\mathbf{R}$ | 1.29               | 0.78              | 0.93                   | 0.00                 | 3.00                  | -0.14           | -0.07          | 0.25                | -0.03             | 0.00               |
| 10-methyl-9,10-dihydroacridine | $^2\mathbf{R}$ | 1.29               | 0.73              | -0.99                  | -0.02                | 1.00                  | -0.62           | -0.06          | 0.71                | -0.03             | 0.00               |
|                                | $^4\mathbf{R}$ | 1.32               | 0.75              | 0.90                   | 0.03                 | 3.00                  | -0.63           | -0.07          | 0.74                | -0.03             | 0.00               |
| 9,10-dihydroacridine           | $^2\mathbf{R}$ | 1.28               | 0.73              | -0.99                  | -0.02                | 1.00                  | -0.44           | -0.06          | 0.53                | -0.04             | 0.00               |
|                                | $^4\mathbf{R}$ | 1.32               | 0.76              | 0.91                   | 0.02                 | 3.00                  | -0.46           | -0.07          | 0.57                | -0.04             | 0.00               |

**Table S11.** Group spin densities and charges (of transition states) of UB3LYP/B2//UB3LYP/B1 single for hydroxylation of different substrates by  $^{2,4}[\text{Fe}^{\text{IV}}(\text{O})(\text{Corrole}^{\text{+}})]$ .

| Substrate                      |               | $\rho_{\text{Fe}}$ | $\rho_{\text{OH}}$ | $\rho_{\text{Ligand}}$ | $\rho_{\text{Sub.}}$ | $\rho_{\text{Total}}$ | $Q_{\text{Fe}}$ | $Q_{\text{OH}}$ | $Q_{\text{Ligand}}$ | $Q_{\text{Sub.}}$ | $Q_{\text{Total}}$ |
|--------------------------------|---------------|--------------------|--------------------|------------------------|----------------------|-----------------------|-----------------|-----------------|---------------------|-------------------|--------------------|
| Ethane                         | $^2\text{TS}$ | 2.40               | -0.01              | -0.81                  | -0.58                | 1.00                  | -0.46           | 0.17            | 0.51                | -0.22             | 0.00               |
|                                | $^4\text{TS}$ | 1.09               | 0.39               | 0.84                   | 0.68                 | 3.00                  | -0.09           | 0.26            | 0.07                | -0.24             | 0.00               |
| Propane                        | $^2\text{TS}$ | 2.33               | -0.07              | -0.78                  | -0.48                | 1.00                  | -0.60           | 0.32            | 0.54                | -0.26             | 0.00               |
|                                | $^4\text{TS}$ | 2.20               | 0.23               | 1.19                   | -0.62                | 3.00                  | 0.44            | 0.92            | -1.14               | -0.23             | 0.00               |
| Toluene                        | $^2\text{TS}$ | 2.24               | 0.02               | -0.81                  | -0.45                | 1.00                  | -0.86           | 0.36            | 0.82                | -0.32             | 0.00               |
|                                | $^4\text{TS}$ | 1.07               | 0.45               | -0.93                  | 0.42                 | 1.00                  | -0.65           | 0.45            | 0.55                | -0.36             | 0.00               |
| Propene                        | $^2\text{TS}$ | 2.21               | 0.02               | -0.81                  | -0.43                | 1.00                  | -0.78           | 0.25            | 0.84                | -0.31             | 0.00               |
|                                | $^4\text{TS}$ | 1.25               | 0.46               | 0.75                   | 0.54                 | 3.00                  | -0.42           | 0.34            | 0.41                | -0.33             | 0.00               |
| Ethylbenzene                   | $^2\text{TS}$ | 2.17               | 0.06               | -0.83                  | -0.40                | 1.00                  | -1.03           | 0.55            | 0.84                | -0.36             | 0.00               |
|                                | $^4\text{TS}$ | 1.33               | 0.46               | 0.70                   | 0.51                 | 3.00                  | -0.78           | 0.61            | 0.54                | -0.36             | 0.00               |
| Indene                         | $^2\text{TS}$ | 2.05               | 0.18               | -0.84                  | -0.39                | 1.00                  | -0.58           | 0.63            | 0.51                | -0.57             | 0.00               |
|                                | $^4\text{TS}$ | 1.56               | 0.44               | 0.60                   | 0.41                 | 3.00                  | -0.52           | 0.64            | 0.50                | -0.62             | 0.00               |
| 9,10-Dihydroanthracene         | $^2\text{TS}$ | 1.95               | 0.20               | -0.80                  | -0.35                | 1.00                  | -0.78           | 1.03            | 0.28                | -0.53             | 0.00               |
|                                | $^4\text{TS}$ | 1.49               | 0.49               | 0.63                   | 0.40                 | 3.00                  | -0.76           | 1.03            | 0.24                | -0.51             | 0.00               |
| 1,4-Cyclohexadiene             | $^2\text{TS}$ | 1.95               | 0.20               | -0.81                  | -0.34                | 1.00                  | -0.63           | 0.59            | 0.43                | -0.39             | 0.00               |
|                                | $^4\text{TS}$ | 1.49               | 0.52               | 0.58                   | 0.40                 | 3.00                  | -0.53           | 0.61            | 0.32                | -0.40             | 0.00               |
| 10-methyl-9,10-dihydroacridine | $^2\text{TS}$ | 1.81               | 0.29               | -0.64                  | -0.46                | 1.00                  | -0.92           | 0.96            | 0.31                | -0.36             | 0.00               |
|                                | $^4\text{TS}$ | 1.56               | 0.51               | 0.44                   | 0.50                 | 3.00                  | -0.46           | 1.13            | -0.34               | -0.34             | 0.00               |
| 9,10-dihydroacridine           | $^2\text{TS}$ | 1.83               | 0.28               | -0.66                  | -0.45                | 1.00                  | 3.00            | 3.00            | 44.00               | 38.00             | 88.00              |
|                                | $^4\text{TS}$ | 1.54               | 0.51               | 0.44                   | 0.51                 | 3.00                  | -0.78           | 0.95            | 0.20                | -0.37             | 0.00               |

**Table S12.** Group spin densities and charges (of reactants) of UB3LYP/B2//UB3LYP/B1 for hydroxylation of different substrates by  $^{2,4}\text{[Fe}^{\text{IV}}(\text{O})(\text{Corrole}^+)]$  (including solvent effect).

| Substrate                      |                | $\rho_{\text{Fe}}$ | $\rho_{\text{O}}$ | $\rho_{\text{Ligand}}$ | $\rho_{\text{SubH}}$ | $\rho_{\text{Total}}$ | $Q_{\text{Fe}}$ | $Q_{\text{O}}$ | $Q_{\text{Ligand}}$ | $Q_{\text{SubH}}$ | $Q_{\text{Total}}$ |
|--------------------------------|----------------|--------------------|-------------------|------------------------|----------------------|-----------------------|-----------------|----------------|---------------------|-------------------|--------------------|
| Ethane                         | $^2\mathbf{R}$ | 1.31               | 0.68              | -0.99                  | 0.00                 | 1.00                  | 0.13            | -0.33          | 0.24                | -0.04             | 0.00               |
|                                | $^4\mathbf{R}$ | 1.37               | 0.70              | 0.93                   | 0.00                 | 3.00                  | 0.11            | -0.34          | 0.27                | -0.04             | 0.00               |
| Propane                        | $^2\mathbf{R}$ | 1.31               | 0.68              | -1.00                  | 0.00                 | 1.00                  | -0.14           | -0.27          | 0.44                | -0.03             | 0.00               |
|                                | $^4\mathbf{R}$ | 1.37               | 0.70              | 0.92                   | 0.00                 | 3.00                  | -0.15           | -0.28          | 0.47                | -0.03             | 0.00               |
| Toluene                        | $^2\mathbf{R}$ | 1.32               | 0.67              | -0.99                  | 0.00                 | 1.00                  | 0.09            | -0.32          | 0.35                | -0.12             | 0.00               |
|                                | $^4\mathbf{R}$ | 1.38               | 0.69              | 0.93                   | 0.00                 | 3.00                  | 0.07            | -0.34          | 0.39                | -0.12             | 0.00               |
| Propene                        | $^2\mathbf{R}$ | 1.32               | 0.67              | -0.99                  | 0.00                 | 1.00                  | 0.08            | -0.32          | 0.30                | -0.06             | 0.00               |
|                                | $^4\mathbf{R}$ | 1.39               | 0.69              | 0.92                   | 0.00                 | 3.00                  | 0.06            | -0.34          | 0.34                | -0.06             | 0.00               |
| Ethylbenzene                   | $^2\mathbf{R}$ | 1.32               | 0.69              | -1.02                  | 0.00                 | 1.00                  | -0.63           | -0.03          | 0.72                | -0.06             | 0.00               |
|                                | $^4\mathbf{R}$ | 1.34               | 0.74              | 0.93                   | 0.00                 | 3.00                  | -0.67           | 0.20           | 0.54                | -0.06             | 0.00               |
| Indene                         | $^2\mathbf{R}$ | 1.32               | 0.66              | -0.99                  | 0.00                 | 1.00                  | -0.02           | -0.23          | 0.39                | -0.13             | 0.00               |
|                                | $^4\mathbf{R}$ | 1.40               | 0.69              | 0.91                   | 0.00                 | 3.00                  | -0.04           | -0.25          | 0.42                | -0.13             | 0.00               |
| 9,10-Dihydroanthracene         | $^2\mathbf{R}$ | 1.30               | 0.69              | -0.99                  | 0.01                 | 1.00                  | -0.09           | -0.10          | 0.29                | -0.11             | 0.00               |
|                                | $^4\mathbf{R}$ | 1.37               | 0.71              | 0.93                   | 0.00                 | 3.00                  | -0.10           | -0.12          | 0.33                | -0.11             | 0.00               |
| 1,4-Cyclohexadiene             | $^2\mathbf{R}$ | 1.32               | 0.67              | -0.99                  | 0.00                 | 1.00                  | -0.02           | -0.22          | 0.27                | -0.03             | 0.00               |
|                                | $^4\mathbf{R}$ | 1.38               | 0.69              | 0.92                   | 0.00                 | 3.00                  | -0.03           | -0.24          | 0.29                | -0.03             | 0.00               |
| 10-methyl-9,10-dihydroacridine | $^2\mathbf{R}$ | 1.34               | 0.66              | -0.99                  | -0.01                | 1.00                  | -0.48           | -0.20          | 0.72                | -0.04             | 0.00               |
|                                | $^4\mathbf{R}$ | 1.39               | 0.69              | 0.90                   | 0.02                 | 3.00                  | -0.51           | -0.21          | 0.77                | -0.04             | 0.00               |
| 9,10-dihydroacridine           | $^2\mathbf{R}$ | 1.33               | 0.67              | -0.98                  | -0.02                | 1.00                  | -0.31           | -0.20          | 0.55                | -0.04             | 0.00               |
|                                | $^4\mathbf{R}$ | 1.39               | 0.69              | 0.91                   | 0.02                 | 3.00                  | -0.33           | -0.21          | 0.59                | -0.05             | 0.00               |

**Table S13.** Group spin densities and charges (of transition states) of UB3LYP/B2//UB3LYP/B1 for hydroxylation of different substrates by  $^{2,4}\text{[Fe}^{\text{IV}}(\text{O})(\text{Corrole}^{\text{+}})]$  (including solvent effect).

| Substrate                      |               | $\rho_{\text{Fe}}$ | $\rho_{\text{OH}}$ | $\rho_{\text{Ligand}}$ | $\rho_{\text{Sub.}}$ | $\rho_{\text{Total}}$ | $Q_{\text{Fe}}$ | $Q_{\text{OH}}$ | $Q_{\text{Ligand}}$ | $Q_{\text{Sub.}}$ | $Q_{\text{Total}}$ |
|--------------------------------|---------------|--------------------|--------------------|------------------------|----------------------|-----------------------|-----------------|-----------------|---------------------|-------------------|--------------------|
| Ethane                         | $^2\text{TS}$ | 2.47               | -0.02              | -0.87                  | -0.58                | 1.00                  | -0.37           | 0.03            | 0.53                | -0.20             | 0.00               |
|                                | $^4\text{TS}$ | 1.11               | 0.35               | 0.86                   | 0.68                 | 3.00                  | 0.00            | 0.13            | 0.09                | -0.22             | 0.00               |
| Propane                        | $^2\text{TS}$ | 2.39               | -0.07              | -0.83                  | -0.49                | 1.00                  | -0.51           | 0.21            | 0.55                | -0.25             | 0.00               |
|                                | $^4\text{TS}$ | 2.22               | 0.21               | 1.18                   | -0.62                | 3.00                  | 0.52            | 0.90            | -1.20               | -0.23             | 0.00               |
| Toluene                        | $^2\text{TS}$ | 2.30               | 0.01               | -0.85                  | -0.46                | 1.00                  | -0.76           | 0.22            | 0.83                | -0.29             | 0.00               |
|                                | $^4\text{TS}$ | 1.12               | 0.40               | -0.93                  | 0.41                 | 1.00                  | -0.54           | 0.33            | 0.57                | -0.36             | 0.00               |
| Propene                        | $^2\text{TS}$ | 2.28               | 0.01               | -0.86                  | -0.43                | 1.00                  | -0.68           | 0.11            | 0.86                | -0.29             | 0.00               |
|                                | $^4\text{TS}$ | 1.28               | 0.42               | 0.78                   | 0.53                 | 3.00                  | -0.32           | 0.20            | 0.43                | -0.32             | 0.00               |
| Ethylbenzene                   | $^2\text{TS}$ | 2.23               | 0.04               | -0.86                  | -0.41                | 1.00                  | -0.94           | 0.43            | 0.85                | -0.34             | 0.00               |
|                                | $^4\text{TS}$ | 1.36               | 0.43               | 0.70                   | 0.51                 | 3.00                  | -0.69           | 0.49            | 0.53                | -0.33             | 0.00               |
| Indene                         | $^2\text{TS}$ | 2.10               | 0.15               | -0.85                  | -0.40                | 1.00                  | -0.48           | 0.49            | 0.51                | -0.52             | 0.00               |
|                                | $^4\text{TS}$ | 1.60               | 0.40               | 0.62                   | 0.38                 | 3.00                  | -0.42           | 0.51            | 0.50                | -0.60             | 0.00               |
| 9,10-Dihydroanthracene         | $^2\text{TS}$ | 2.00               | 0.17               | -0.81                  | -0.36                | 1.00                  | -0.70           | 0.94            | 0.26                | -0.50             | 0.00               |
|                                | $^4\text{TS}$ | 1.52               | 0.46               | 0.62                   | 0.40                 | 3.00                  | -0.68           | 0.94            | 0.19                | -0.46             | 0.00               |
| 1,4-Cyclohexadiene             | $^2\text{TS}$ | 2.01               | 0.17               | -0.81                  | -0.37                | 1.00                  | -0.53           | 0.45            | 0.41                | -0.34             | 0.00               |
|                                | $^4\text{TS}$ | 1.55               | 0.48               | 0.54                   | 0.43                 | 3.00                  | -0.43           | 0.48            | 0.27                | -0.33             | 0.00               |
| 10-methyl-9,10-dihydroacridine | $^2\text{TS}$ | 1.85               | 0.28               | -0.55                  | -0.57                | 1.00                  | -0.80           | 0.86            | 0.16                | -0.21             | 0.00               |
|                                | $^4\text{TS}$ | 1.72               | 0.47               | 0.11                   | 0.70                 | 3.00                  | -0.37           | 1.05            | -0.59               | -0.09             | 0.00               |
| 9,10-dihydroacridine           | $^2\text{TS}$ | 1.86               | 0.27               | -0.49                  | -0.64                | 1.00                  | -0.98           | 0.66            | 0.47                | -0.15             | 0.00               |
|                                | $^4\text{TS}$ | 1.77               | 0.46               | 0.02                   | 0.75                 | 3.00                  | -0.66           | 0.84            | -0.11               | -0.07             | 0.00               |



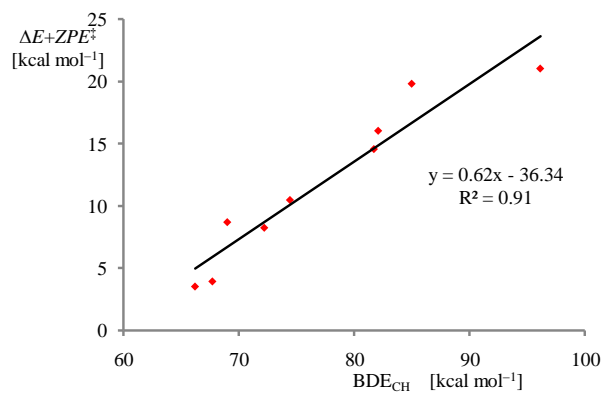

**Figure S5.** Correlation of  $BDE_{CH}$  with barrier height for high-spin barriers of  $^4[Fe^{IV}(O)(Cor^{+*})]$  with substrates.

**Cartesian coordinates of all structures discussed in this work. The value in subscript refers to the substrate: 1 (ethane), 2 (propane), 3 (toluene), 4 (propene), 5 (ethylbenzene), 6 (indene), 7 (9,10-dehydroanthracene), 8 (1,4-cyclohexadiene), 9 (10-methyl-9,10-dehydroacridine) and 10 (9,10-dehydroacridine).**

**<sup>2</sup>R<sub>1</sub>:**

|    |              |              |              |
|----|--------------|--------------|--------------|
| Fe | 0.018635000  | 0.190869000  | 0.153644000  |
| N  | 0.028152000  | 0.063821000  | 2.081687000  |
| N  | 1.925675000  | -0.065951000 | -0.014738000 |
| N  | -0.015306000 | 0.978419000  | -1.582911000 |
| N  | -1.661282000 | 1.090047000  | 0.236409000  |
| C  | -1.056322000 | 0.251331000  | 2.922427000  |
| C  | -0.674829000 | -0.144272000 | 4.253932000  |
| C  | 0.636991000  | -0.569107000 | 4.203570000  |
| C  | 1.076001000  | -0.439299000 | 2.838159000  |
| C  | 2.751967000  | -0.554793000 | 0.985601000  |
| C  | 4.053797000  | -0.807924000 | 0.424180000  |
| C  | 3.995468000  | -0.471593000 | -0.912822000 |
| C  | 2.659769000  | -0.007580000 | -1.187703000 |
| C  | 0.888014000  | 0.958298000  | -2.630133000 |
| C  | 0.227815000  | 1.558422000  | -3.767386000 |
| C  | -1.052015000 | 1.928419000  | -3.367293000 |
| C  | -1.183433000 | 1.551074000  | -1.990813000 |
| C  | -2.149537000 | 1.617736000  | -0.922269000 |
| C  | -3.477660000 | 2.100006000  | -0.682076000 |
| C  | -3.766721000 | 1.839951000  | 0.653435000  |
| C  | -2.608864000 | 1.202066000  | 1.238119000  |
| C  | -2.312796000 | 0.778096000  | 2.527819000  |
| C  | 2.341919000  | -0.736690000 | 2.314145000  |
| C  | 2.171598000  | 0.463966000  | -2.433130000 |
| H  | -1.316933000 | -0.097611000 | 5.121598000  |
| H  | 1.244334000  | -0.928717000 | 5.021441000  |
| H  | 4.905266000  | -1.185784000 | 0.971301000  |
| H  | 4.793401000  | -0.527026000 | -1.639209000 |
| H  | 0.667219000  | 1.704210000  | -4.743614000 |
| H  | -1.804443000 | 2.413205000  | -3.970850000 |
| H  | -4.122594000 | 2.579529000  | -1.402864000 |
| H  | -4.680824000 | 2.082258000  | 1.175964000  |
| O  | -0.474697000 | -1.325253000 | -0.209178000 |
| H  | -2.595294000 | -2.529230000 | 0.591413000  |
| C  | -3.533132000 | -2.951329000 | 0.969475000  |
| H  | -3.297763000 | -3.553783000 | 1.855985000  |
| H  | -3.071317000 | 0.873940000  | 3.297982000  |
| H  | 3.080548000  | -1.128542000 | 3.006815000  |
| H  | 2.863977000  | 0.456294000  | -3.268844000 |
| C  | -4.237792000 | -3.795094000 | -0.102477000 |
| H  | -3.604431000 | -4.628651000 | -0.429205000 |
| H  | -5.179082000 | -4.218851000 | 0.270080000  |
| H  | -4.471540000 | -3.193034000 | -0.988922000 |
| H  | -4.166732000 | -2.116346000 | 1.294829000  |

**<sup>4</sup>R<sub>1</sub>:**

|    |              |              |              |
|----|--------------|--------------|--------------|
| Fe | 0.016092000  | 0.191650000  | 0.151719000  |
| N  | 0.026057000  | 0.067032000  | 2.080404000  |
| N  | 1.924057000  | -0.063659000 | -0.015315000 |
| N  | -0.014583000 | 0.984601000  | -1.582612000 |
| N  | -1.660517000 | 1.096993000  | 0.235645000  |
| C  | -1.058415000 | 0.253419000  | 2.920779000  |
| C  | -0.678497000 | -0.146067000 | 4.252124000  |

|   |              |              |              |
|---|--------------|--------------|--------------|
| C | 0.632448000  | -0.572168000 | 4.201881000  |
| C | 1.072760000  | -0.439508000 | 2.836874000  |
| C | 2.749181000  | -0.556071000 | 0.984743000  |
| C | 4.050355000  | -0.813418000 | 0.422997000  |
| C | 3.992936000  | -0.476467000 | -0.913421000 |
| C | 2.658299000  | -0.007581000 | -1.187876000 |
| C | 0.888847000  | 0.963121000  | -2.630119000 |
| C | 0.229119000  | 1.562746000  | -3.767953000 |
| C | -1.050646000 | 1.932897000  | -3.368464000 |
| C | -1.182280000 | 1.556713000  | -1.991366000 |
| C | -2.148685000 | 1.623931000  | -0.923018000 |
| C | -3.477317000 | 2.106036000  | -0.683384000 |
| C | -3.766639000 | 1.846631000  | 0.651984000  |
| C | -2.608903000 | 1.208778000  | 1.237050000  |
| C | -2.313747000 | 0.782669000  | 2.525977000  |
| C | 2.337894000  | -0.737994000 | 2.312528000  |
| C | 2.171103000  | 0.466118000  | -2.432816000 |
| H | -1.321566000 | -0.101114000 | 5.119167000  |
| H | 1.238565000  | -0.935236000 | 5.019126000  |
| H | 4.900303000  | -1.195156000 | 0.969783000  |
| H | 4.790310000  | -0.534671000 | -1.640208000 |
| H | 0.668392000  | 1.706848000  | -4.744487000 |
| H | -1.802986000 | 2.417242000  | -3.972485000 |
| H | -4.122066000 | 2.585190000  | -1.404582000 |
| H | -4.681276000 | 2.088132000  | 1.173947000  |
| O | -0.474089000 | -1.327949000 | -0.207684000 |
| H | -2.589948000 | -2.533178000 | 0.594720000  |
| C | -3.526851000 | -2.956373000 | 0.973887000  |
| H | -3.289923000 | -3.558270000 | 1.860373000  |
| H | -3.072665000 | 0.878267000  | 3.295837000  |
| H | 3.075551000  | -1.132134000 | 3.005041000  |
| H | 2.863537000  | 0.457355000  | -3.268532000 |
| C | -4.231533000 | -3.801378000 | -0.097087000 |
| H | -3.597474000 | -4.634332000 | -0.424002000 |
| H | -5.172055000 | -4.226061000 | 0.276384000  |
| H | -4.466636000 | -3.199947000 | -0.983605000 |
| H | -4.161303000 | -2.122141000 | 1.299620000  |

**<sup>2</sup>R<sub>2</sub>:**

|    |              |              |              |
|----|--------------|--------------|--------------|
| Fe | -0.085876000 | 0.296245000  | 0.111094000  |
| N  | -0.120919000 | 0.158785000  | 2.038017000  |
| N  | 1.793765000  | -0.128073000 | -0.026949000 |
| N  | -0.019045000 | 1.093168000  | -1.620170000 |
| N  | -1.680740000 | 1.340635000  | 0.171159000  |
| C  | -1.199319000 | 0.437335000  | 2.861163000  |
| C  | -0.878448000 | 0.001446000  | 4.196254000  |
| C  | 0.391235000  | -0.538521000 | 4.165123000  |
| C  | 0.864320000  | -0.440214000 | 2.808655000  |
| C  | 2.555713000  | -0.693805000 | 0.984137000  |
| C  | 3.839493000  | -1.059094000 | 0.443158000  |
| C  | 3.834832000  | -0.711832000 | -0.892224000 |
| C  | 2.550608000  | -0.129213000 | -1.186585000 |
| C  | 0.897400000  | 0.998542000  | -2.651846000 |
| C  | 0.313686000  | 1.662091000  | -3.795803000 |

|   |              |              |              |
|---|--------------|--------------|--------------|
| C | -0.934829000 | 2.142708000  | -3.414998000 |
| C | -1.123819000 | 1.770332000  | -2.043838000 |
| C | -2.098965000 | 1.917062000  | -0.991556000 |
| C | -3.382552000 | 2.515293000  | -0.770458000 |
| C | -3.717375000 | 2.274144000  | 0.557924000  |
| C | -2.631752000 | 1.531479000  | 1.157464000  |
| C | -2.397068000 | 1.076024000  | 2.448936000  |
| C | 2.108108000  | -0.845860000 | 2.304040000  |
| C | 2.128121000  | 0.390553000  | -2.436874000 |
| H | -1.528834000 | 0.101353000  | 5.053204000  |
| H | 0.949383000  | -0.955439000 | 4.990791000  |
| H | 4.644235000  | -1.514082000 | 1.002167000  |
| H | 4.637290000  | -0.834206000 | -1.605294000 |
| H | 0.781542000  | 1.773619000  | -4.763287000 |
| H | -1.630197000 | 2.696321000  | -4.027702000 |
| H | -3.968932000 | 3.055277000  | -1.498463000 |
| H | -4.614943000 | 2.594727000  | 1.066786000  |
| O | -0.704079000 | -1.168826000 | -0.269734000 |
| H | -2.443392000 | -2.739014000 | 0.738554000  |
| C | -3.193065000 | -3.412504000 | 1.173897000  |
| H | -2.641847000 | -4.276547000 | 1.572963000  |
| H | -3.157327000 | 1.234532000  | 3.206840000  |
| H | 2.796670000  | -1.305619000 | 3.006449000  |
| H | 2.831539000  | 0.326047000  | -3.260809000 |
| C | -4.155532000 | -3.886947000 | 0.072902000  |
| H | -3.616725000 | -4.395037000 | -0.735541000 |
| H | -4.904196000 | -4.585283000 | 0.470911000  |
| H | -4.693620000 | -3.037854000 | -0.368241000 |
| C | -3.917494000 | -2.696599000 | 2.325936000  |
| H | -4.652849000 | -3.356382000 | 2.805865000  |
| H | -3.209951000 | -2.362417000 | 3.094362000  |
| H | -4.454039000 | -1.812075000 | 1.957841000  |

#### <sup>4</sup>R<sub>2</sub>:

|    |              |              |              |
|----|--------------|--------------|--------------|
| Fe | -0.086129000 | 0.293675000  | 0.112516000  |
| N  | -0.118532000 | 0.162743000  | 2.040430000  |
| N  | 1.795444000  | -0.124651000 | -0.024754000 |
| N  | -0.019092000 | 1.092354000  | -1.618091000 |
| N  | -1.679873000 | 1.339856000  | 0.173022000  |
| C  | -1.197213000 | 0.438738000  | 2.863405000  |
| C  | -0.876166000 | 0.002560000  | 4.198883000  |
| C  | 0.394091000  | -0.534967000 | 4.168080000  |
| C  | 0.867520000  | -0.435242000 | 2.811541000  |
| C  | 2.558443000  | -0.689264000 | 0.986575000  |
| C  | 3.841683000  | -1.056494000 | 0.444927000  |
| C  | 3.835726000  | -0.711973000 | -0.890715000 |
| C  | 2.551166000  | -0.128722000 | -1.184771000 |
| C  | 0.896352000  | 0.995955000  | -2.650855000 |
| C  | 0.310196000  | 1.654470000  | -3.796418000 |
| C  | -0.939147000 | 2.132929000  | -3.416114000 |
| C  | -1.125750000 | 1.764962000  | -2.043184000 |
| C  | -2.100566000 | 1.911926000  | -0.990598000 |
| C  | -3.386279000 | 2.506708000  | -0.770421000 |
| C  | -3.719628000 | 2.268116000  | 0.558570000  |
| C  | -2.631572000 | 1.529777000  | 1.159243000  |
| C  | -2.395803000 | 1.075528000  | 2.450647000  |
| C  | 2.111130000  | -0.839550000 | 2.306500000  |
| C  | 2.127291000  | 0.388962000  | -2.435331000 |
| H  | -1.527326000 | 0.100700000  | 5.055446000  |
| H  | 0.952425000  | -0.952084000 | 4.993515000  |
| H  | 4.646351000  | -1.511669000 | 1.003874000  |
| H  | 4.637045000  | -0.836624000 | -1.604676000 |
| H  | 0.776432000  | 1.763087000  | -4.765008000 |
| H  | -1.636539000 | 2.682667000  | -4.030009000 |

|   |              |              |              |
|---|--------------|--------------|--------------|
| H | -3.974569000 | 3.043106000  | -1.499535000 |
| H | -4.618313000 | 2.586476000  | 1.066845000  |
| O | -0.697829000 | -1.177583000 | -0.261388000 |
| H | -2.440983000 | -2.737335000 | 0.735622000  |
| C | -3.193901000 | -3.410069000 | 1.166510000  |
| H | -2.647457000 | -4.281688000 | 1.555557000  |
| H | -3.156365000 | 1.233054000  | 3.208503000  |
| H | 2.800363000  | -1.298109000 | 3.009135000  |
| H | 2.829991000  | 0.322948000  | -3.259816000 |
| C | -4.162400000 | -3.867299000 | 0.063502000  |
| H | -3.628927000 | -4.370564000 | -0.751469000 |
| H | -4.914465000 | -4.564867000 | 0.456453000  |
| H | -4.696216000 | -3.010422000 | -0.367690000 |
| C | -3.910509000 | -2.700872000 | 2.327569000  |
| H | -4.650863000 | -3.359638000 | 2.801220000  |
| H | -3.199053000 | -2.381621000 | 3.098760000  |
| H | -4.439969000 | -1.807715000 | 1.970212000  |

#### <sup>2</sup>R<sub>3</sub>:

|    |              |              |              |
|----|--------------|--------------|--------------|
| Fe | 0.023509000  | 0.225504000  | 0.141372000  |
| N  | -0.004893000 | 0.140752000  | 2.070128000  |
| N  | 1.932744000  | -0.043138000 | 0.015723000  |
| N  | 0.028884000  | 0.974325000  | -1.612835000 |
| N  | -1.650374000 | 1.136478000  | 0.170772000  |
| C  | -1.110625000 | 0.335355000  | 2.880804000  |
| C  | -0.760454000 | -0.038149000 | 4.226923000  |
| C  | 0.554850000  | -0.455012000 | 4.216053000  |
| C  | 1.026469000  | -0.346680000 | 2.859428000  |
| C  | 2.738565000  | -0.507736000 | 1.044129000  |
| C  | 4.050248000  | -0.777297000 | 0.515003000  |
| C  | 4.018967000  | -0.474747000 | -0.831110000 |
| C  | 2.690362000  | -0.015020000 | -1.143824000 |
| C  | 0.952160000  | 0.925613000  | -2.641696000 |
| C  | 0.317311000  | 1.502680000  | -3.804846000 |
| C  | -0.968232000 | 1.888009000  | -3.438349000 |
| C  | -1.128311000 | 1.543421000  | -2.056547000 |
| C  | -2.115884000 | 1.635720000  | -1.009853000 |
| C  | -3.453741000 | 2.108573000  | -0.810592000 |
| C  | -3.773673000 | 1.866961000  | 0.521923000  |
| C  | -2.624707000 | 1.253137000  | 1.146159000  |
| C  | -2.362309000 | 0.843370000  | 2.447725000  |
| C  | 2.302329000  | -0.656156000 | 2.368654000  |
| C  | 2.229010000  | 0.429301000  | -2.409029000 |
| H  | -1.428685000 | 0.013441000  | 5.073815000  |
| H  | 1.144045000  | -0.798043000 | 5.054164000  |
| H  | 4.889942000  | -1.142683000 | 1.088227000  |
| H  | 4.831038000  | -0.549726000 | -1.539891000 |
| H  | 0.776349000  | 1.623946000  | -4.775411000 |
| H  | -1.706020000 | 2.362857000  | -4.067373000 |
| H  | -4.085435000 | 2.568650000  | -1.555474000 |
| H  | -4.703559000 | 2.102365000  | 1.018439000  |
| O  | -0.485343000 | -1.294643000 | -0.186502000 |
| H  | -2.614577000 | -2.348267000 | 0.698246000  |
| C  | -3.495007000 | -2.937849000 | 0.989206000  |
| C  | -4.218906000 | -2.315160000 | 2.161889000  |
| C  | -5.347943000 | -1.499136000 | 1.969180000  |
| C  | -3.766683000 | -2.518427000 | 3.478888000  |
| C  | -4.414809000 | -1.920804000 | 4.565679000  |
| C  | -5.534533000 | -1.104848000 | 4.357340000  |
| C  | -5.999717000 | -0.897916000 | 3.052841000  |
| H  | -3.141851000 | -3.947120000 | 1.229880000  |
| H  | -6.874645000 | -0.277703000 | 2.879726000  |
| H  | -6.044069000 | -0.647574000 | 5.200110000  |
| H  | -4.052290000 | -2.098871000 | 5.574153000  |

|   |              |              |              |
|---|--------------|--------------|--------------|
| H | -2.899026000 | -3.149717000 | 3.649406000  |
| H | -3.148878000 | 0.918936000  | 3.190602000  |
| H | 3.026393000  | -1.032433000 | 3.084988000  |
| H | 2.937334000  | 0.399255000  | -3.230748000 |
| H | -5.716672000 | -1.335685000 | 0.960348000  |
| H | -4.146575000 | -3.008663000 | 0.111785000  |

**<sup>4</sup>R<sub>3</sub>:**

|    |              |              |              |
|----|--------------|--------------|--------------|
| Fe | 0.019039000  | 0.226290000  | 0.143671000  |
| N  | -0.007090000 | 0.146709000  | 2.073380000  |
| N  | 1.928690000  | -0.042533000 | 0.018052000  |
| N  | 0.026097000  | 0.977652000  | -1.609479000 |
| N  | -1.650705000 | 1.144921000  | 0.174959000  |
| C  | -1.112096000 | 0.340728000  | 2.884145000  |
| C  | -0.762900000 | -0.036024000 | 4.230201000  |
| C  | 0.551498000  | -0.454191000 | 4.219061000  |
| C  | 1.023710000  | -0.343921000 | 2.862433000  |
| C  | 2.734244000  | -0.509007000 | 1.045992000  |
| C  | 4.044611000  | -0.784211000 | 0.515866000  |
| C  | 4.012927000  | -0.483505000 | -0.830223000 |
| C  | 2.685316000  | -0.018888000 | -1.142062000 |
| C  | 0.948347000  | 0.925618000  | -2.639449000 |
| C  | 0.313591000  | 1.501487000  | -3.803025000 |
| C  | -0.971241000 | 1.888670000  | -3.436249000 |
| C  | -1.130453000 | 1.547077000  | -2.053422000 |
| C  | -2.117075000 | 1.641831000  | -1.005889000 |
| C  | -3.455601000 | 2.114364000  | -0.806875000 |
| C  | -3.774853000 | 1.874845000  | 0.525810000  |
| C  | -2.625294000 | 1.261903000  | 1.150540000  |
| C  | -2.363201000 | 0.851039000  | 2.451269000  |
| C  | 2.297993000  | -0.655432000 | 2.370679000  |
| C  | 2.223860000  | 0.425928000  | -2.406771000 |
| H  | -1.431709000 | 0.014241000  | 5.076705000  |
| H  | 1.139865000  | -0.800285000 | 5.056489000  |
| H  | 4.883259000  | -1.152661000 | 1.088635000  |
| H  | 4.823722000  | -0.562817000 | -1.540001000 |
| H  | 0.771647000  | 1.619650000  | -4.774425000 |
| H  | -1.708994000 | 2.363209000  | -4.065556000 |
| H  | -4.087698000 | 2.572942000  | -1.552333000 |
| H  | -4.705084000 | 2.109500000  | 1.022030000  |
| O  | -0.487791000 | -1.297556000 | -0.179231000 |
| H  | -2.604707000 | -2.352823000 | 0.693654000  |
| C  | -3.485269000 | -2.942057000 | 0.985174000  |
| C  | -4.210210000 | -2.317564000 | 2.156216000  |
| C  | -5.340165000 | -1.503265000 | 1.961462000  |
| C  | -3.758261000 | -2.517458000 | 3.473861000  |
| C  | -4.407631000 | -1.918498000 | 4.559176000  |
| C  | -5.528342000 | -1.104411000 | 4.348756000  |
| C  | -5.993181000 | -0.900684000 | 3.043624000  |
| H  | -3.132028000 | -3.950803000 | 1.227999000  |
| H  | -6.868882000 | -0.282009000 | 2.868872000  |
| H  | -6.038931000 | -0.646238000 | 5.190408000  |
| H  | -4.045348000 | -2.094150000 | 5.568167000  |
| H  | -2.889877000 | -3.147296000 | 3.646019000  |
| H  | -3.149738000 | 0.926573000  | 3.194218000  |
| H  | 3.021723000  | -1.033340000 | 3.086586000  |
| H  | 2.931374000  | 0.393082000  | -3.229157000 |
| H  | -5.708758000 | -1.342426000 | 0.952156000  |
| H  | -4.136318000 | -3.014762000 | 0.107505000  |

**<sup>2</sup>R<sub>4</sub>:**

|    |             |              |              |
|----|-------------|--------------|--------------|
| Fe | 0.027532000 | 0.223159000  | 0.125356000  |
| N  | 0.058899000 | 0.055221000  | 2.049236000  |
| N  | 1.928343000 | -0.058557000 | -0.072144000 |

|   |              |              |              |
|---|--------------|--------------|--------------|
| N | -0.014226000 | 1.047670000  | -1.593418000 |
| N | -1.637085000 | 1.145292000  | 0.246949000  |
| C | -1.016210000 | 0.233172000  | 2.905141000  |
| C | -0.626171000 | -0.198679000 | 4.222297000  |
| C | 0.681015000  | -0.634817000 | 4.148963000  |
| C | 1.107794000  | -0.477544000 | 2.782834000  |
| C | 2.760186000  | -0.578541000 | 0.908781000  |
| C | 4.051396000  | -0.838326000 | 0.325969000  |
| C | 3.981596000  | -0.474445000 | -1.003128000 |
| C | 2.649221000  | 0.013353000  | -1.252164000 |
| C | 0.876144000  | 1.035373000  | -2.652144000 |
| C | 0.210890000  | 1.668968000  | -3.768832000 |
| C | -1.057883000 | 2.049685000  | -3.345479000 |
| C | -1.178514000 | 1.645998000  | -1.975130000 |
| C | -2.131852000 | 1.703536000  | -0.894877000 |
| C | -3.451801000 | 2.192753000  | -0.630138000 |
| C | -3.730241000 | 1.903833000  | 0.702651000  |
| C | -2.573844000 | 1.242375000  | 1.260022000  |
| C | -2.270972000 | 0.779890000  | 2.535836000  |
| C | 2.364171000  | -0.780850000 | 2.237686000  |
| C | 2.153603000  | 0.517761000  | -2.482218000 |
| H | -1.260633000 | -0.168305000 | 5.096115000  |
| H | 1.292481000  | -1.020379000 | 4.951810000  |
| H | 4.904154000  | -1.238603000 | 0.854882000  |
| H | 4.769737000  | -0.526131000 | -1.740396000 |
| H | 0.640696000  | 1.828138000  | -4.747270000 |
| H | -1.810140000 | 2.558243000  | -3.929367000 |
| H | -4.099144000 | 2.695607000  | -1.332691000 |
| H | -4.636524000 | 2.142579000  | 1.240160000  |
| O | -0.501581000 | -1.277009000 | -0.255862000 |
| H | -2.164890000 | -2.630480000 | 1.009594000  |
| C | -2.916511000 | -3.263314000 | 1.500396000  |
| C | -4.116604000 | -2.461787000 | 1.922234000  |
| C | -4.582659000 | -2.357791000 | 3.174103000  |
| H | -2.445720000 | -3.759915000 | 2.356264000  |
| H | -4.105184000 | -2.872703000 | 4.005134000  |
| H | -3.025340000 | 0.850574000  | 3.311693000  |
| H | 3.105358000  | -1.196488000 | 2.913562000  |
| H | 2.835801000  | 0.517052000  | -3.326248000 |
| H | -3.198970000 | -4.036509000 | 0.771906000  |
| H | -4.632522000 | -1.929340000 | 1.121317000  |
| H | -5.461756000 | -1.766045000 | 3.414585000  |

**<sup>4</sup>R<sub>4</sub>:**

|    |              |              |              |
|----|--------------|--------------|--------------|
| Fe | 0.021363000  | 0.224100000  | 0.122785000  |
| N  | 0.054628000  | 0.055549000  | 2.047385000  |
| N  | 1.922298000  | -0.059474000 | -0.075355000 |
| N  | -0.017312000 | 1.056895000  | -1.592177000 |
| N  | -1.637678000 | 1.155759000  | 0.249343000  |
| C  | -1.019241000 | 0.232344000  | 2.903971000  |
| C  | -0.630820000 | -0.207007000 | 4.219737000  |
| C  | 0.674626000  | -0.646525000 | 4.144718000  |
| C  | 1.102205000  | -0.484195000 | 2.779005000  |
| C  | 2.752870000  | -0.585534000 | 0.903397000  |
| C  | 4.042403000  | -0.850743000 | 0.318915000  |
| C  | 3.972964000  | -0.484387000 | -1.009141000 |
| C  | 2.642430000  | 0.010790000  | -1.255850000 |
| C  | 0.871968000  | 1.043424000  | -2.652047000 |
| C  | 0.207863000  | 1.679995000  | -3.767285000 |
| C  | -1.059881000 | 2.062840000  | -3.342550000 |
| C  | -1.180217000 | 1.658092000  | -1.972446000 |
| C  | -2.132424000 | 1.716006000  | -0.891024000 |
| C  | -3.452196000 | 2.206669000  | -0.624892000 |
| C  | -3.730272000 | 1.916476000  | 0.707238000  |
| C  | -2.574320000 | 1.251984000  | 1.263103000  |

|   |              |              |              |
|---|--------------|--------------|--------------|
| C | -2.272583000 | 0.784643000  | 2.536661000  |
| C | 2.356362000  | -0.789541000 | 2.232061000  |
| C | 2.147475000  | 0.520112000  | -2.483696000 |
| H | -1.265760000 | -0.179274000 | 5.093288000  |
| H | 1.284605000  | -1.038410000 | 4.945627000  |
| H | 4.893393000  | -1.256882000 | 0.846174000  |
| H | 4.759853000  | -0.539019000 | -1.747543000 |
| H | 0.636936000  | 1.838673000  | -4.746109000 |
| H | -1.811376000 | 2.573830000  | -3.925311000 |
| H | -4.099129000 | 2.711275000  | -1.326557000 |
| H | -4.636370000 | 2.154731000  | 1.245272000  |
| O | -0.507277000 | -1.277978000 | -0.258926000 |
| H | -2.154025000 | -2.632023000 | 1.004844000  |
| C | -2.899700000 | -3.266463000 | 1.502742000  |
| C | -4.101706000 | -2.469270000 | 1.927169000  |
| C | -4.561209000 | -2.360759000 | 3.181108000  |
| H | -2.421807000 | -3.756534000 | 2.358455000  |
| H | -4.076274000 | -2.868555000 | 4.012201000  |
| H | -3.026535000 | 0.854883000  | 3.312984000  |
| H | 3.096586000  | -1.209954000 | 2.906140000  |
| H | 2.828734000  | 0.518321000  | -3.328567000 |
| H | -3.182062000 | -4.044602000 | 0.779483000  |
| H | -4.625185000 | -1.944110000 | 1.126314000  |
| H | -5.442166000 | -1.772479000 | 3.423325000  |

## <sup>2</sup>R<sub>5</sub>:

|    |              |              |              |
|----|--------------|--------------|--------------|
| Fe | -0.097301000 | 0.500768000  | 0.819387000  |
| N  | 0.796592000  | 1.101913000  | 2.423301000  |
| N  | 1.486721000  | -0.316342000 | 0.074231000  |
| N  | -0.865074000 | 0.564411000  | -0.923832000 |
| N  | -1.466795000 | 1.794288000  | 1.114072000  |
| C  | 0.242709000  | 1.879306000  | 3.428596000  |
| C  | 1.163848000  | 1.916408000  | 4.534964000  |
| C  | 2.264002000  | 1.158864000  | 4.188036000  |
| C  | 2.029294000  | 0.646963000  | 2.863081000  |
| C  | 2.640467000  | -0.608067000 | 0.788979000  |
| C  | 3.507945000  | -1.401326000 | -0.043367000 |
| C  | 2.864712000  | -1.582076000 | -1.250486000 |
| C  | 1.596692000  | -0.902810000 | -1.174655000 |
| C  | -0.554173000 | -0.091863000 | -2.102100000 |
| C  | -1.614576000 | 0.204111000  | -3.040860000 |
| C  | -2.526877000 | 1.035144000  | -2.401652000 |
| C  | -2.037025000 | 1.245885000  | -1.070494000 |
| C  | -2.390273000 | 1.969566000  | 0.125295000  |
| C  | -3.409989000 | 2.854392000  | 0.603486000  |
| C  | -3.067863000 | 3.197581000  | 1.909040000  |
| C  | -1.829905000 | 2.526894000  | 2.229632000  |
| C  | -1.004908000 | 2.545924000  | 3.349320000  |
| C  | 2.879940000  | -0.163184000 | 2.094875000  |
| C  | 0.627425000  | -0.811757000 | -2.207901000 |
| H  | 1.002961000  | 2.456757000  | 5.456641000  |
| H  | 3.149356000  | 0.975061000  | 4.779144000  |
| H  | 4.481938000  | -1.769190000 | 0.244949000  |
| H  | 3.227516000  | -2.121186000 | -2.113623000 |
| H  | -1.667299000 | -0.151189000 | -4.059791000 |
| H  | -3.431396000 | 1.448715000  | -2.821040000 |
| H  | -4.271849000 | 3.194057000  | 0.049199000  |
| H  | -3.611760000 | 3.860396000  | 2.566406000  |
| O  | -0.827484000 | -0.835396000 | 1.419057000  |
| H  | -2.610769000 | -3.801645000 | 2.486476000  |
| C  | -3.246569000 | -4.021675000 | 1.618190000  |
| C  | -4.408982000 | -3.045504000 | 1.581432000  |
| C  | -4.182210000 | -1.659811000 | 1.685921000  |
| C  | -5.729558000 | -3.498460000 | 1.424753000  |

|   |              |              |              |
|---|--------------|--------------|--------------|
| C | -6.800164000 | -2.597156000 | 1.374005000  |
| C | -6.563388000 | -1.222512000 | 1.480101000  |
| C | -5.250483000 | -0.757984000 | 1.635858000  |
| H | -3.633305000 | -5.039574000 | 1.760227000  |
| H | -5.056394000 | 0.307602000  | 1.719727000  |
| H | -7.391848000 | -0.520952000 | 1.444299000  |
| H | -7.814115000 | -2.968472000 | 1.254899000  |
| H | -5.919576000 | -4.566040000 | 1.345369000  |
| H | -1.310326000 | 3.126260000  | 4.214051000  |
| H | 3.820371000  | -0.458116000 | 2.550249000  |
| H | 0.851071000  | -1.319506000 | -3.140495000 |
| C | -2.371501000 | -3.975719000 | 0.346129000  |
| H | -1.569312000 | -4.721877000 | 0.401873000  |
| H | -2.971433000 | -4.182990000 | -0.548210000 |
| H | -1.908685000 | -2.989647000 | 0.234173000  |
| H | -3.165081000 | -1.292931000 | 1.800093000  |

## <sup>4</sup>R<sub>5</sub>:

|    |              |              |              |
|----|--------------|--------------|--------------|
| Fe | -0.070944000 | 0.489140000  | 0.667501000  |
| N  | 0.632372000  | 0.954163000  | 2.406324000  |
| N  | 1.590988000  | -0.272456000 | 0.043572000  |
| N  | -0.633290000 | 0.703985000  | -1.141837000 |
| N  | -1.465635000 | 1.767824000  | 0.907311000  |
| C  | -0.036378000 | 1.645955000  | 3.402883000  |
| C  | 0.749120000  | 1.581241000  | 4.609043000  |
| C  | 1.883971000  | 0.848645000  | 4.329275000  |
| C  | 1.807335000  | 0.453777000  | 2.946338000  |
| C  | 2.656050000  | -0.629271000 | 0.858658000  |
| C  | 3.615044000  | -1.358660000 | 0.069337000  |
| C  | 3.114662000  | -1.436590000 | -1.213753000 |
| C  | 1.844391000  | -0.756599000 | -1.228148000 |
| C  | -0.189269000 | 0.141695000  | -2.326156000 |
| C  | -1.137461000 | 0.516513000  | -3.351722000 |
| C  | -2.119794000 | 1.298589000  | -2.754967000 |
| C  | -1.783518000 | 1.400673000  | -1.364770000 |
| C  | -2.272714000 | 2.026775000  | -0.161408000 |
| C  | -3.345697000 | 2.873010000  | 0.269254000  |
| C  | -3.155658000 | 3.107043000  | 1.628204000  |
| C  | -1.957774000 | 2.407136000  | 2.031554000  |
| C  | -1.268561000 | 2.326336000  | 3.235855000  |
| C  | 2.742058000  | -0.294371000 | 2.216201000  |
| C  | 0.999238000  | -0.575272000 | -2.353440000 |
| H  | 0.479270000  | 2.040806000  | 5.548865000  |
| H  | 2.694313000  | 0.607474000  | 5.001739000  |
| H  | 4.550193000  | -1.755981000 | 0.436348000  |
| H  | 3.574860000  | -1.906655000 | -2.070818000 |
| H  | -1.073695000 | 0.243924000  | -4.395233000 |
| H  | -2.971761000 | 1.750412000  | -3.240016000 |
| H  | -4.142066000 | 3.258763000  | -0.349062000 |
| H  | -3.773958000 | 3.716085000  | 2.271701000  |
| O  | -0.853785000 | -0.892344000 | 1.069093000  |
| H  | -2.163064000 | -3.202742000 | 1.740779000  |
| C  | -3.073247000 | -3.765077000 | 1.502479000  |
| C  | -4.286346000 | -2.898145000 | 1.785025000  |
| C  | -4.194293000 | -1.497084000 | 1.703531000  |
| C  | -5.530973000 | -3.471775000 | 2.099270000  |
| C  | -6.656249000 | -2.670589000 | 2.323380000  |
| C  | -6.553660000 | -1.276858000 | 2.236256000  |
| C  | -5.318772000 | -0.693792000 | 1.926642000  |
| H  | -3.092062000 | -4.649796000 | 2.153890000  |
| H  | -5.226448000 | 0.386757000  | 1.861808000  |
| H  | -7.425514000 | -0.653447000 | 2.412319000  |
| H  | -7.608606000 | -3.132032000 | 2.568995000  |
| H  | -5.615892000 | -4.553439000 | 2.173026000  |

|   |              |              |              |
|---|--------------|--------------|--------------|
| H | -1.674090000 | 2.832892000  | 4.105759000  |
| H | 3.624533000  | -0.632833000 | 2.750637000  |
| H | 1.329202000  | -1.007427000 | -3.292664000 |
| C | -2.997612000 | -4.223824000 | 0.028974000  |
| H | -2.118122000 | -4.857731000 | -0.136969000 |
| H | -3.890496000 | -4.794220000 | -0.254801000 |
| H | -2.922649000 | -3.357528000 | -0.637870000 |
| H | -3.232235000 | -1.046767000 | 1.472818000  |

**<sup>2</sup>R<sub>6</sub>:**

|    |              |              |              |
|----|--------------|--------------|--------------|
| Fe | 0.069300000  | -0.171718000 | -0.008378000 |
| N  | 0.009946000  | -0.223401000 | 1.921713000  |
| N  | 1.995171000  | -0.247431000 | -0.092725000 |
| N  | 0.034966000  | 0.542695000  | -1.775479000 |
| N  | -1.690908000 | 0.564491000  | -0.028779000 |
| C  | -1.124572000 | -0.109178000 | 2.712146000  |
| C  | -0.763342000 | -0.416813000 | 4.071290000  |
| C  | 0.584277000  | -0.716674000 | 4.088068000  |
| C  | 1.065031000  | -0.596622000 | 2.737204000  |
| C  | 2.820892000  | -0.627109000 | 0.957871000  |
| C  | 4.161580000  | -0.785169000 | 0.454546000  |
| C  | 4.129126000  | -0.500259000 | -0.893779000 |
| C  | 2.770253000  | -0.166034000 | -1.236772000 |
| C  | 0.980547000  | 0.570989000  | -2.785100000 |
| C  | 0.314513000  | 1.061714000  | -3.971524000 |
| C  | -1.010157000 | 1.320631000  | -3.637499000 |
| C  | -1.164172000 | 0.984217000  | -2.252235000 |
| C  | -2.177895000 | 0.997739000  | -1.227275000 |
| C  | -3.553713000 | 1.356310000  | -1.059239000 |
| C  | -3.872964000 | 1.120364000  | 0.275347000  |
| C  | -2.686567000 | 0.621915000  | 0.929076000  |
| C  | -2.405026000 | 0.277715000  | 2.247527000  |
| C  | 2.375933000  | -0.799266000 | 2.272789000  |
| C  | 2.294914000  | 0.211233000  | -2.519431000 |
| H  | -1.442117000 | -0.397775000 | 4.911782000  |
| H  | 1.188415000  | -0.985962000 | 4.942197000  |
| H  | 5.015444000  | -1.086114000 | 1.042818000  |
| H  | 4.955798000  | -0.521929000 | -1.588504000 |
| H  | 0.779679000  | 1.212868000  | -4.934952000 |
| H  | -1.778986000 | 1.707408000  | -4.289223000 |
| H  | -4.210994000 | 1.742878000  | -1.823493000 |
| H  | -4.827490000 | 1.292495000  | 0.751415000  |
| O  | -0.262779000 | -1.744908000 | -0.314967000 |
| H  | -3.201654000 | 0.330091000  | 2.982837000  |
| H  | 3.114444000  | -1.106940000 | 3.005762000  |
| H  | 3.020378000  | 0.238938000  | -3.325955000 |
| C  | 3.934775000  | -4.678237000 | 0.957040000  |
| C  | 2.957183000  | -4.557243000 | -0.065824000 |
| C  | 5.294136000  | -4.760537000 | 0.634300000  |
| C  | 3.239608000  | -4.690863000 | 2.251651000  |
| C  | 3.338315000  | -4.518424000 | -1.403919000 |
| C  | 1.585152000  | -4.484519000 | 0.572922000  |
| C  | 5.670475000  | -4.721828000 | -0.715702000 |
| H  | 6.046707000  | -4.858320000 | 1.411838000  |
| C  | 1.903966000  | -4.582745000 | 2.051533000  |
| H  | 3.738298000  | -4.780792000 | 3.209868000  |
| C  | 4.703996000  | -4.601579000 | -1.725213000 |
| H  | 2.595236000  | -4.423971000 | -2.190543000 |
| H  | 0.930067000  | -5.305638000 | 0.244008000  |
| H  | 1.050755000  | -3.554546000 | 0.322981000  |
| H  | 6.720935000  | -4.789017000 | -0.983465000 |
| H  | 1.141576000  | -4.565291000 | 2.820637000  |
| H  | 5.014216000  | -4.576147000 | -2.765615000 |

**<sup>4</sup>R<sub>6</sub>:**

|    |              |              |              |
|----|--------------|--------------|--------------|
| Fe | 0.066944000  | -0.172194000 | -0.005127000 |
| N  | 0.010480000  | -0.213118000 | 1.926086000  |
| N  | 1.993450000  | -0.246017000 | -0.090231000 |
| N  | 0.032414000  | 0.540533000  | -1.773014000 |
| N  | -1.690512000 | 0.570736000  | -0.024747000 |
| C  | -1.122641000 | -0.097397000 | 2.717070000  |
| C  | -0.761237000 | -0.404412000 | 4.076849000  |
| C  | 0.585608000  | -0.705676000 | 4.093299000  |
| C  | 1.065990000  | -0.587100000 | 2.741753000  |
| C  | 2.819840000  | -0.624485000 | 0.960381000  |
| C  | 4.159563000  | -0.787968000 | 0.456150000  |
| C  | 4.126077000  | -0.508074000 | -0.892949000 |
| C  | 2.767380000  | -0.171038000 | -1.235237000 |
| C  | 0.977052000  | 0.564707000  | -2.784101000 |
| C  | 0.310424000  | 1.051487000  | -3.971494000 |
| C  | -1.013893000 | 1.311638000  | -3.637210000 |
| C  | -1.166593000 | 0.980516000  | -2.250363000 |
| C  | -2.179054000 | 0.998348000  | -1.224053000 |
| C  | -3.555689000 | 1.356576000  | -1.056250000 |
| C  | -3.873524000 | 1.126231000  | 0.279097000  |
| C  | -2.685940000 | 0.630884000  | 0.934036000  |
| C  | -2.403392000 | 0.290047000  | 2.252329000  |
| C  | 2.375229000  | -0.792132000 | 2.276227000  |
| C  | 2.290922000  | 0.203454000  | -2.518080000 |
| H  | -1.439926000 | -0.384504000 | 4.917383000  |
| H  | 1.189743000  | -0.975760000 | 4.947182000  |
| H  | 5.013113000  | -1.090036000 | 1.044278000  |
| H  | 4.951596000  | -0.535118000 | -1.588855000 |
| H  | 0.774519000  | 1.198311000  | -4.936096000 |
| H  | -1.783215000 | 1.696346000  | -4.289584000 |
| H  | -4.213829000 | 1.739275000  | -1.821705000 |
| H  | -4.828049000 | 1.298640000  | 0.755059000  |
| O  | -0.263424000 | -1.749507000 | -0.301976000 |
| H  | -3.199270000 | 0.344629000  | 2.988331000  |
| H  | 3.114264000  | -1.098957000 | 3.009140000  |
| H  | 3.015600000  | 0.227495000  | -3.325513000 |
| C  | 3.933969000  | -4.679105000 | 0.952960000  |
| C  | 2.961797000  | -4.559469000 | -0.075222000 |
| C  | 5.294759000  | -4.765622000 | 0.637279000  |
| C  | 3.232298000  | -4.685430000 | 2.244071000  |
| C  | 3.349727000  | -4.526384000 | -1.411525000 |
| C  | 1.586750000  | -4.480500000 | 0.556346000  |
| C  | 5.677951000  | -4.732556000 | -0.710944000 |
| H  | 6.043257000  | -4.862302000 | 1.418888000  |
| C  | 1.897906000  | -4.574566000 | 2.036778000  |
| H  | 3.725923000  | -4.773325000 | 3.205103000  |
| C  | 4.716811000  | -4.613764000 | -1.725716000 |
| H  | 2.610788000  | -4.433177000 | -2.202203000 |
| H  | 0.930806000  | -5.300697000 | 0.226829000  |
| H  | 1.056291000  | -3.549628000 | 0.300724000  |
| H  | 6.729597000  | -4.803065000 | -0.973171000 |
| H  | 1.131715000  | -4.552265000 | 2.801965000  |
| H  | 5.032297000  | -4.592808000 | -2.764649000 |

**<sup>2</sup>R<sub>7</sub>:**

|    |              |              |              |
|----|--------------|--------------|--------------|
| Fe | 0.347859000  | -0.424758000 | 0.162017000  |
| N  | 0.349689000  | -0.886371000 | 2.036730000  |
| N  | 2.136612000  | 0.303946000  | 0.193502000  |
| N  | -0.006309000 | 0.556747000  | -1.434057000 |
| N  | -1.557780000 | -0.475574000 | 0.164230000  |
| C  | -0.713153000 | -1.419377000 | 2.748430000  |
| C  | -0.234671000 | -1.826247000 | 4.044292000  |
| C  | 1.112980000  | -1.535078000 | 4.102595000  |

|   |              |              |              |   |              |              |              |
|---|--------------|--------------|--------------|---|--------------|--------------|--------------|
| C | 1.478581000  | -0.949326000 | 2.838877000  | C | 1.482927000  | -0.950397000 | 2.839575000  |
| C | 3.058035000  | 0.103528000  | 1.211460000  | C | 3.058923000  | 0.099940000  | 1.207089000  |
| C | 4.333155000  | 0.619546000  | 0.785189000  | C | 4.334417000  | 0.612050000  | 0.776860000  |
| C | 4.166323000  | 1.122988000  | -0.488655000 | C | 4.165493000  | 1.113934000  | -0.496945000 |
| C | 2.788668000  | 0.923752000  | -0.859050000 | C | 2.785871000  | 0.917981000  | -0.863255000 |
| C | 0.827393000  | 1.164406000  | -2.356001000 | C | 0.820368000  | 1.161601000  | -2.354992000 |
| C | -0.001143000 | 1.568861000  | -3.470212000 | C | -0.009727000 | 1.565172000  | -3.467766000 |
| C | -1.309799000 | 1.197726000  | -3.181825000 | C | -1.318036000 | 1.194748000  | -3.176317000 |
| C | -1.288653000 | 0.559847000  | -1.898008000 | C | -1.294625000 | 0.559070000  | -1.891471000 |
| C | -2.200039000 | -0.048321000 | -0.960752000 | C | -2.204002000 | -0.047689000 | -0.951047000 |
| C | -3.596032000 | -0.339349000 | -0.828230000 | C | -3.600058000 | -0.340990000 | -0.816570000 |
| C | -3.764225000 | -0.960811000 | 0.406878000  | C | -3.765887000 | -0.960654000 | 0.419163000  |
| C | -2.467982000 | -1.042277000 | 1.037860000  | C | -2.468245000 | -1.039700000 | 1.048856000  |
| C | -2.046005000 | -1.515851000 | 2.275493000  | C | -2.043612000 | -1.513770000 | 2.284422000  |
| C | 2.743452000  | -0.492607000 | 2.439803000  | C | 2.746054000  | -0.495213000 | 2.436668000  |
| C | 2.178356000  | 1.321507000  | -2.076729000 | C | 2.172517000  | 1.315903000  | -2.078827000 |
| H | -0.846065000 | -2.271110000 | 4.815531000  | H | -0.836648000 | -2.275018000 | 4.820258000  |
| H | 1.787123000  | -1.700388000 | 4.930480000  | H | 1.797085000  | -1.706590000 | 4.928858000  |
| H | 5.237952000  | 0.609262000  | 1.375449000  | H | 5.240861000  | 0.599461000  | 1.364515000  |
| H | 4.912720000  | 1.594784000  | -1.111287000 | H | 4.911454000  | 1.582594000  | -1.122477000 |
| H | 0.344902000  | 2.082690000  | -4.355424000 | H | 0.334847000  | 2.076880000  | -4.354762000 |
| H | -2.180358000 | 1.361002000  | -3.798967000 | H | -2.189706000 | 1.357645000  | -3.792003000 |
| H | -4.366956000 | -0.111159000 | -1.548740000 | H | -4.371965000 | -0.115096000 | -1.536739000 |
| H | -4.692552000 | -1.307993000 | 0.836426000  | H | -4.692877000 | -1.310192000 | 0.849661000  |
| O | 0.667105000  | -1.904873000 | -0.458685000 | O | 0.668522000  | -1.910955000 | -0.454270000 |
| H | -0.466503000 | -3.993980000 | -0.199835000 | H | -0.463092000 | -3.991592000 | -0.198646000 |
| C | -0.732629000 | -5.046793000 | 0.000951000  | C | -0.731908000 | -5.043691000 | 0.002727000  |
| C | -1.797721000 | -5.097677000 | 1.081052000  | C | -1.801416000 | -5.091447000 | 1.078545000  |
| C | -3.154367000 | -4.996109000 | 0.710446000  | C | -3.156515000 | -4.989446000 | 0.702417000  |
| C | -3.499844000 | -4.837655000 | -0.759441000 | C | -3.496069000 | -4.833253000 | -0.769095000 |
| C | -2.548309000 | -5.605650000 | -1.659793000 | C | -2.541557000 | -5.603458000 | -1.664405000 |
| C | -1.192665000 | -5.703035000 | -1.288198000 | C | -1.187515000 | -5.701438000 | -1.287186000 |
| C | -0.301682000 | -6.398290000 | -2.118227000 | C | -0.293846000 | -6.398732000 | -2.112628000 |
| C | -0.741743000 | -6.987501000 | -3.308093000 | C | -0.729637000 | -6.989349000 | -3.303355000 |
| C | -2.089197000 | -6.893468000 | -3.674268000 | C | -2.075530000 | -6.894704000 | -3.675098000 |
| C | -2.985590000 | -6.207625000 | -2.847941000 | C | -2.974609000 | -6.206827000 | -2.853402000 |
| C | -1.466058000 | -5.236313000 | 2.436909000  | C | -1.475363000 | -5.227891000 | 2.436017000  |
| C | -2.461081000 | -5.264842000 | 3.421033000  | C | -2.474340000 | -5.253989000 | 3.416225000  |
| C | -3.807900000 | -5.162623000 | 3.052078000  | C | -3.819615000 | -5.151502000 | 3.041715000  |
| C | -4.147260000 | -5.033709000 | 1.700145000  | C | -4.153410000 | -5.024683000 | 1.688196000  |
| H | 0.189570000  | -5.520297000 | 0.357836000  | H | 0.188077000  | -5.518043000 | 0.364214000  |
| H | 0.742721000  | -6.476339000 | -1.828539000 | H | 0.749321000  | -6.477191000 | -1.818639000 |
| H | -0.039444000 | -7.521649000 | -3.940763000 | H | -0.025262000 | -7.525041000 | -3.932404000 |
| H | -2.440579000 | -7.355210000 | -4.591955000 | H | -2.423636000 | -7.357515000 | -4.593498000 |
| H | -4.034512000 | -6.139433000 | -3.125399000 | H | -4.022354000 | -6.138122000 | -3.135169000 |
| H | -3.454008000 | -3.765682000 | -1.019029000 | H | -3.448422000 | -3.761752000 | -1.030283000 |
| H | -4.534496000 | -5.151204000 | -0.943110000 | H | -4.530226000 | -5.146362000 | -0.956301000 |
| H | -5.192644000 | -4.971109000 | 1.408069000  | H | -5.197576000 | -4.962012000 | 1.391778000  |
| H | -4.587476000 | -5.199938000 | 3.807165000  | H | -4.602256000 | -5.187103000 | 3.793713000  |
| H | -2.187822000 | -5.382094000 | 4.465590000  | H | -2.205351000 | -5.369771000 | 4.462062000  |
| H | -0.420862000 | -5.322288000 | 2.720793000  | H | -0.431382000 | -5.314238000 | 2.724221000  |
| H | -2.771112000 | -1.982448000 | 2.933357000  | H | -2.767050000 | -1.981037000 | 2.943658000  |
| H | 3.552103000  | -0.597047000 | 3.156787000  | H | 3.556838000  | -0.600687000 | 3.151190000  |
| H | 2.814249000  | 1.801021000  | -2.813884000 | H | 2.807236000  | 1.793573000  | -2.818294000 |

<sup>4</sup>R<sub>7</sub>:

|    |              |              |              |
|----|--------------|--------------|--------------|
| Fe | 0.346116000  | -0.428318000 | 0.163582000  |
| N  | 0.351069000  | -0.884872000 | 2.040482000  |
| N  | 2.134884000  | 0.301320000  | 0.191765000  |
| N  | -0.011776000 | 0.555985000  | -1.429975000 |
| N  | -1.559820000 | -0.471800000 | 0.173422000  |
| C  | -0.708992000 | -1.418518000 | 2.754253000  |
| C  | -0.227078000 | -1.828580000 | 4.048487000  |
| C  | 1.120436000  | -1.538489000 | 4.103583000  |

<sup>2</sup>R<sub>8</sub>:

|    |              |              |              |
|----|--------------|--------------|--------------|
| Fe | -0.313901000 | 0.199895000  | 0.263274000  |
| N  | -0.464954000 | 0.167240000  | 2.188226000  |
| N  | 1.504800000  | -0.450930000 | 0.253156000  |
| N  | -0.060266000 | 0.894055000  | -1.495335000 |
| N  | -1.769219000 | 1.429837000  | 0.185155000  |
| C  | -1.544333000 | 0.609718000  | 2.933965000  |
| C  | -1.351048000 | 0.203065000  | 4.302464000  |
| C  | -0.157643000 | -0.485592000 | 4.368718000  |

|   |              |              |              |
|---|--------------|--------------|--------------|
| C | 0.396809000  | -0.509301000 | 3.039789000  |
| C | 2.137688000  | -1.052437000 | 1.329528000  |
| C | 3.393936000  | -1.594214000 | 0.881289000  |
| C | 3.502999000  | -1.314545000 | -0.466140000 |
| C | 2.317046000  | -0.598895000 | -0.860116000 |
| C | 0.892374000  | 0.643329000  | -2.466198000 |
| C | 0.456602000  | 1.315965000  | -3.668164000 |
| C | -0.743720000 | 1.959131000  | -3.382010000 |
| C | -1.050113000 | 1.677777000  | -2.011060000 |
| C | -2.053623000 | 1.991580000  | -1.024391000 |
| C | -3.266403000 | 2.746340000  | -0.904967000 |
| C | -3.697423000 | 2.613189000  | 0.410634000  |
| C | -2.741769000 | 1.779535000  | 1.104834000  |
| C | -2.633141000 | 1.363869000  | 2.425730000  |
| C | 1.603983000  | -1.087701000 | 2.626992000  |
| C | 2.028309000  | -0.094227000 | -2.152936000 |
| H | -2.030829000 | 0.418372000  | 5.114115000  |
| H | 0.298862000  | -0.929718000 | 5.241167000  |
| H | 4.106335000  | -2.112981000 | 1.506022000  |
| H | 4.322092000  | -1.565512000 | -1.124561000 |
| H | 0.986344000  | 1.325318000  | -4.609792000 |
| H | -1.332320000 | 2.561980000  | -4.056991000 |
| H | -3.744791000 | 3.313620000  | -1.689050000 |
| H | -4.576086000 | 3.061463000  | 0.851525000  |
| O | -1.088323000 | -1.200160000 | -0.078304000 |
| H | -3.407774000 | 1.648171000  | 3.130577000  |
| H | 2.187329000  | -1.601970000 | 3.383914000  |
| H | 2.762627000  | -0.280241000 | -2.930179000 |
| H | 0.184452000  | -5.351787000 | 4.722061000  |
| C | -0.030703000 | -5.802116000 | 3.737094000  |
| C | -1.435883000 | -5.448137000 | 3.307293000  |
| C | 1.013718000  | -5.368472000 | 2.734294000  |
| H | 0.045990000  | -6.890361000 | 3.910117000  |
| C | -1.724952000 | -4.848940000 | 2.143977000  |
| H | -2.235524000 | -5.706041000 | 3.999777000  |
| C | 0.719529000  | -4.769243000 | 1.571622000  |
| H | 2.051755000  | -5.572126000 | 2.994116000  |
| C | -0.686281000 | -4.451794000 | 1.124129000  |
| H | -2.759762000 | -4.620297000 | 1.895495000  |
| H | 1.520554000  | -4.483041000 | 0.892170000  |
| H | -0.893370000 | -4.959434000 | 0.165343000  |
| H | -0.778092000 | -3.379251000 | 0.887438000  |

#### <sup>4</sup>R<sub>8</sub>:

|    |              |              |              |
|----|--------------|--------------|--------------|
| Fe | -0.315442000 | 0.195221000  | 0.259886000  |
| N  | -0.470181000 | 0.157666000  | 2.185044000  |
| N  | 1.506953000  | -0.447379000 | 0.253701000  |
| N  | -0.055514000 | 0.901454000  | -1.493004000 |
| N  | -1.770823000 | 1.425200000  | 0.183518000  |
| C  | -1.553424000 | 0.592357000  | 2.929213000  |
| C  | -1.364566000 | 0.177947000  | 4.296469000  |
| C  | -0.169803000 | -0.507506000 | 4.363451000  |
| C  | 0.389932000  | -0.521759000 | 3.036384000  |
| C  | 2.137377000  | -1.053809000 | 1.329267000  |
| C  | 3.395064000  | -1.593800000 | 0.881913000  |
| C  | 3.507418000  | -1.308603000 | -0.463625000 |
| C  | 2.322034000  | -0.590966000 | -0.857542000 |
| C  | 0.900207000  | 0.655837000  | -2.462688000 |
| C  | 0.465241000  | 1.330318000  | -3.664107000 |
| C  | -0.737806000 | 1.968347000  | -3.379340000 |
| C  | -1.046530000 | 1.682652000  | -2.009371000 |
| C  | -2.054010000 | 1.989808000  | -1.024593000 |
| C  | -3.270180000 | 2.739776000  | -0.906148000 |
| C  | -3.704264000 | 2.600988000  | 0.407699000  |

|   |              |              |              |
|---|--------------|--------------|--------------|
| C | -2.747717000 | 1.768163000  | 1.101572000  |
| C | -2.642018000 | 1.346384000  | 2.420596000  |
| C | 1.599412000  | -1.095410000 | 2.624265000  |
| C | 2.036026000  | -0.080950000 | -2.148967000 |
| H | -2.048518000 | 0.386172000  | 5.106467000  |
| H | 0.284127000  | -0.956391000 | 5.234792000  |
| H | 4.105414000  | -2.115930000 | 1.506167000  |
| H | 4.327848000  | -1.557175000 | -1.121291000 |
| H | 0.996779000  | 1.343095000  | -4.604675000 |
| H | -1.326937000 | 2.570775000  | -4.054234000 |
| H | -3.748367000 | 3.307964000  | -1.689700000 |
| H | -4.586204000 | 3.043994000  | 0.847349000  |
| O | -1.082480000 | -1.209886000 | -0.085776000 |
| H | -3.419877000 | 1.625258000  | 3.124132000  |
| H | 2.181112000  | -1.612405000 | 3.380658000  |
| H | 2.772711000  | -0.262905000 | -2.924986000 |
| H | 0.198370000  | -5.320153000 | 4.724417000  |
| C | -0.019479000 | -5.779551000 | 3.744223000  |
| C | -1.427354000 | -5.433181000 | 3.317042000  |
| C | 1.019679000  | -5.351813000 | 2.733420000  |
| H | 0.060942000  | -6.866044000 | 3.926361000  |
| C | -1.722721000 | -4.844450000 | 2.149956000  |
| H | -2.223525000 | -5.687824000 | 4.014720000  |
| C | 0.719087000  | -4.763027000 | 1.567007000  |
| H | 2.059285000  | -5.551164000 | 2.990349000  |
| C | -0.689260000 | -4.452288000 | 1.122941000  |
| H | -2.759193000 | -4.620994000 | 1.903680000  |
| H | 1.516545000  | -4.480833000 | 0.881711000  |
| H | -0.898940000 | -4.967532000 | 0.168798000  |
| H | -0.784540000 | -3.381662000 | 0.878687000  |

#### <sup>2</sup>R<sub>9</sub>:

|    |              |              |              |
|----|--------------|--------------|--------------|
| Fe | -0.045606000 | -0.152750000 | 0.297082000  |
| N  | -0.031779000 | -0.045956000 | 2.224930000  |
| N  | 1.873081000  | -0.008164000 | 0.134579000  |
| N  | -0.227264000 | 0.405275000  | -1.518657000 |
| N  | -1.874656000 | 0.377486000  | 0.300292000  |
| C  | -1.139837000 | -0.006747000 | 3.051476000  |
| C  | -0.699126000 | -0.159244000 | 4.415300000  |
| C  | 0.673659000  | -0.291588000 | 4.398394000  |
| C  | 1.094482000  | -0.222967000 | 3.021562000  |
| C  | 2.772870000  | -0.185475000 | 1.170794000  |
| C  | 4.105209000  | -0.213514000 | 0.627108000  |
| C  | 3.993005000  | -0.056473000 | -0.739437000 |
| C  | 2.592880000  | 0.071653000  | -1.050693000 |
| C  | 0.669647000  | 0.462682000  | -2.568263000 |
| C  | -0.087192000 | 0.777071000  | -3.754591000 |
| C  | -1.423813000 | 0.907785000  | -3.382191000 |
| C  | -1.488028000 | 0.668315000  | -1.973358000 |
| C  | -2.453536000 | 0.648136000  | -0.904897000 |
| C  | -3.861345000 | 0.845464000  | -0.704573000 |
| C  | -4.104008000 | 0.675432000  | 0.650742000  |
| C  | -2.838863000 | 0.382949000  | 1.294431000  |
| C  | -2.480390000 | 0.180156000  | 2.616447000  |
| C  | 2.396344000  | -0.297474000 | 2.521142000  |
| C  | 2.031080000  | 0.280479000  | -2.330828000 |
| H  | -1.348784000 | -0.155478000 | 5.278474000  |
| H  | 1.333586000  | -0.415948000 | 5.244779000  |
| H  | 5.010995000  | -0.330955000 | 1.204029000  |
| H  | 4.793731000  | -0.020756000 | -1.464102000 |
| H  | 0.322390000  | 0.904522000  | -4.746258000 |
| H  | -2.254412000 | 1.153223000  | -4.026747000 |
| H  | -4.587063000 | 1.072071000  | -1.470375000 |
| H  | -5.057213000 | 0.752833000  | 1.152970000  |



|   |              |              |              |   |              |              |              |
|---|--------------|--------------|--------------|---|--------------|--------------|--------------|
| O | -0.198041000 | -1.774679000 | 0.121659000  | H | -4.588084000 | 1.082112000  | -1.464567000 |
| H | -1.980301000 | -3.241686000 | 0.933576000  | H | -5.056285000 | 0.756945000  | 1.158531000  |
| C | -2.896973000 | -3.836844000 | 0.857937000  | O | -0.197098000 | -1.773364000 | 0.121560000  |
| C | -3.760439000 | -3.671114000 | 2.089648000  | H | -1.980367000 | -3.245608000 | 0.936462000  |
| C | -5.152490000 | -3.906577000 | 1.982059000  | C | -2.897353000 | -3.840269000 | 0.861742000  |
| C | -5.045665000 | -3.713100000 | -0.453964000 | C | -3.762796000 | -3.669367000 | 2.091474000  |
| C | -3.653471000 | -3.469241000 | -0.400675000 | C | -5.154378000 | -3.907001000 | 1.982544000  |
| C | -3.003422000 | -2.947665000 | -1.522495000 | C | -5.043708000 | -3.722973000 | -0.454019000 |
| C | -3.703188000 | -2.693366000 | -2.709488000 | C | -3.652047000 | -3.476920000 | -0.399315000 |
| C | -5.075379000 | -2.955191000 | -2.765888000 | C | -3.000881000 | -2.957425000 | -1.521520000 |
| C | -5.749816000 | -3.449835000 | -1.644692000 | C | -3.699135000 | -2.708055000 | -2.710501000 |
| C | -3.217092000 | -3.350722000 | 3.336400000  | C | -5.070730000 | -2.972066000 | -2.768223000 |
| C | -4.016882000 | -3.282243000 | 4.485243000  | C | -5.746323000 | -3.464221000 | -1.646457000 |
| C | -5.388406000 | -3.528420000 | 4.376542000  | C | -3.221925000 | -3.342403000 | 3.337613000  |
| C | -5.958425000 | -3.827433000 | 3.134859000  | C | -4.023769000 | -3.269436000 | 4.484845000  |
| H | -2.577224000 | -4.892216000 | 0.786973000  | C | -5.394740000 | -3.517678000 | 4.374850000  |
| H | -1.939260000 | -2.742171000 | -1.453765000 | C | -5.962313000 | -3.823229000 | 3.133512000  |
| H | -3.180517000 | -2.298164000 | -3.574533000 | H | -2.578799000 | -4.896295000 | 0.795179000  |
| H | -5.633091000 | -2.762120000 | -3.677624000 | H | -1.937085000 | -2.750285000 | -1.451552000 |
| H | -6.820746000 | -3.605673000 | -1.696990000 | H | -3.175674000 | -2.315131000 | -3.576156000 |
| H | -7.029359000 | -3.976278000 | 3.067563000  | H | -5.627292000 | -2.782867000 | -3.681502000 |
| H | -6.025254000 | -3.477001000 | 5.254564000  | H | -6.816929000 | -3.621939000 | -1.700084000 |
| H | -3.572982000 | -3.048913000 | 5.447763000  | H | -7.032939000 | -3.973874000 | 3.065146000  |
| H | -2.148775000 | -3.167029000 | 3.406044000  | H | -6.033197000 | -3.463080000 | 5.251537000  |
| H | -3.252845000 | 0.175047000  | 3.377479000  | H | -3.581744000 | -3.031540000 | 5.447138000  |
| H | 3.195431000  | -0.437964000 | 3.242608000  | H | -2.153850000 | -3.157527000 | 3.408197000  |
| H | 2.717947000  | 0.327988000  | -3.169927000 | H | -3.249859000 | 0.170878000  | 3.379285000  |
| N | -5.701135000 | -4.190253000 | 0.709064000  | H | 3.197332000  | -0.442075000 | 3.237724000  |
| C | -7.057472000 | -4.721467000 | 0.607172000  | H | 2.715067000  | 0.339997000  | -3.171683000 |
| H | -7.833389000 | -3.940437000 | 0.629207000  | N | -5.700069000 | -4.197754000 | 0.709820000  |
| H | -7.156714000 | -5.280523000 | -0.325973000 | C | -7.055835000 | -4.730014000 | 0.607838000  |
| H | -7.239168000 | -5.412858000 | 1.433193000  | H | -7.832472000 | -3.949494000 | 0.625660000  |

#### <sup>4</sup>R<sub>9</sub>:

|    |              |              |              |
|----|--------------|--------------|--------------|
| Fe | -0.046401000 | -0.149459000 | 0.296062000  |
| N  | -0.030266000 | -0.045088000 | 2.224366000  |
| N  | 1.873302000  | -0.000690000 | 0.132468000  |
| N  | -0.227729000 | 0.418918000  | -1.516500000 |
| N  | -1.874461000 | 0.383961000  | 0.301844000  |
| C  | -1.137532000 | -0.010081000 | 3.051973000  |
| C  | -0.695883000 | -0.168210000 | 4.414793000  |
| C  | 0.677096000  | -0.299338000 | 4.396264000  |
| C  | 1.096076000  | -0.224899000 | 3.019645000  |
| C  | 2.774361000  | -0.184029000 | 1.168179000  |
| C  | 4.106189000  | -0.215419000 | 0.622408000  |
| C  | 3.992621000  | -0.054471000 | -0.743182000 |
| C  | 2.591985000  | 0.079323000  | -1.051793000 |
| C  | 0.668854000  | 0.475816000  | -2.567675000 |
| C  | -0.090415000 | 0.789249000  | -3.754087000 |
| C  | -1.425860000 | 0.918464000  | -3.380476000 |
| C  | -1.488253000 | 0.679685000  | -1.970293000 |
| C  | -2.454250000 | 0.657035000  | -0.901505000 |
| C  | -3.861677000 | 0.853547000  | -0.699982000 |
| C  | -4.103343000 | 0.681107000  | 0.655624000  |
| C  | -2.838452000 | 0.387066000  | 1.296779000  |
| C  | -2.477786000 | 0.178869000  | 2.617758000  |
| C  | 2.398212000  | -0.298588000 | 2.516754000  |
| C  | 2.028633000  | 0.292213000  | -2.332243000 |
| H  | -1.344860000 | -0.168750000 | 5.278493000  |
| H  | 1.337749000  | -0.427592000 | 5.241466000  |
| H  | 5.012310000  | -0.338349000 | 1.197673000  |
| H  | 4.792210000  | -0.020609000 | -1.469156000 |
| H  | 0.317871000  | 0.915330000  | -4.746464000 |
| H  | -2.257768000 | 1.161934000  | -4.024040000 |

#### <sup>2</sup>R<sub>10</sub>:

|    |              |              |              |
|----|--------------|--------------|--------------|
| Fe | 0.037230000  | -0.087326000 | -0.011767000 |
| N  | 0.002799000  | 0.102509000  | 1.909289000  |
| N  | 1.964878000  | -0.056464000 | -0.121956000 |
| N  | -0.061960000 | 0.395837000  | -1.854650000 |
| N  | -1.759476000 | 0.540005000  | -0.088032000 |
| C  | -1.125050000 | 0.236577000  | 2.698883000  |
| C  | -0.732588000 | 0.118408000  | 4.080599000  |
| C  | 0.630953000  | -0.088185000 | 4.111360000  |
| C  | 1.093695000  | -0.101122000 | 2.746629000  |
| C  | 2.823961000  | -0.236485000 | 0.948492000  |
| C  | 4.167216000  | -0.362727000 | 0.447164000  |
| C  | 4.102194000  | -0.261700000 | -0.927726000 |
| C  | 2.720748000  | -0.070584000 | -1.286497000 |
| C  | 0.865980000  | 0.354587000  | -2.878089000 |
| C  | 0.160851000  | 0.653929000  | -4.100240000 |
| C  | -1.175777000 | 0.874819000  | -3.775040000 |
| C  | -1.292595000 | 0.705473000  | -2.359089000 |
| C  | -2.287976000 | 0.787142000  | -1.321112000 |
| C  | -3.686873000 | 1.070736000  | -1.172701000 |
| C  | -3.977061000 | 0.974953000  | 0.181216000  |
| C  | -2.749381000 | 0.642486000  | 0.874912000  |
| C  | -2.439720000 | 0.477475000  | 2.215220000  |
| C  | 2.403854000  | -0.267919000 | 2.289505000  |
| C  | 2.207242000  | 0.109505000  | -2.591900000 |
| H  | -1.405468000 | 0.193868000  | 4.922439000  |
| H  | 1.258495000  | -0.211847000 | 4.982105000  |
| H  | 5.048467000  | -0.504054000 | 1.055852000  |
| H  | 4.923537000  | -0.303515000 | -1.628584000 |

|   |              |              |              |   |              |              |              |
|---|--------------|--------------|--------------|---|--------------|--------------|--------------|
| H | 0.604422000  | 0.712037000  | -5.083735000 | H | -1.972209000 | 1.147566000  | -4.452556000 |
| H | -1.973351000 | 1.133557000  | -4.455052000 | H | -4.375366000 | 1.317797000  | -1.965406000 |
| H | -4.376637000 | 1.304735000  | -1.969000000 | H | -4.937159000 | 1.134099000  | 0.653317000  |
| H | -4.937860000 | 1.129175000  | 0.650222000  | O | -0.204379000 | -1.703615000 | -0.116211000 |
| O | -0.204418000 | -1.704281000 | -0.115270000 | H | -2.211349000 | -2.780984000 | 0.863794000  |
| H | -2.211971000 | -2.774178000 | 0.867284000  | C | -3.111694000 | -3.401625000 | 0.786658000  |
| C | -3.110796000 | -3.396655000 | 0.786598000  | C | -4.036223000 | -3.168429000 | 1.968177000  |
| C | -4.036080000 | -3.171420000 | 1.968959000  | C | -5.434762000 | -3.275859000 | 1.794084000  |
| C | -5.434503000 | -3.278433000 | 1.793840000  | C | -5.192997000 | -3.271895000 | -0.653536000 |
| C | -5.191993000 | -3.260627000 | -0.653551000 | C | -3.789686000 | -3.158400000 | -0.550285000 |
| C | -3.788548000 | -3.148291000 | -0.549406000 | C | -3.050411000 | -2.881346000 | -1.705861000 |
| C | -3.049042000 | -2.866793000 | -1.703691000 | C | -3.675499000 | -2.752112000 | -2.953070000 |
| C | -3.673949000 | -2.730893000 | -2.950248000 | C | -5.064919000 | -2.898440000 | -3.048678000 |
| C | -5.063596000 | -2.875812000 | -3.046848000 | C | -5.824211000 | -3.147629000 | -1.903527000 |
| C | -5.823084000 | -3.130210000 | -1.903179000 | C | -3.541768000 | -2.912163000 | 3.251808000  |
| C | -3.542288000 | -2.922434000 | 3.254240000  | C | -4.395987000 | -2.786856000 | 4.355696000  |
| C | -4.397027000 | -2.804573000 | 4.358466000  | C | -5.777871000 | -2.918325000 | 4.173304000  |
| C | -5.778829000 | -2.936199000 | 4.174987000  | C | -6.296993000 | -3.153328000 | 2.898730000  |
| C | -6.297355000 | -3.163654000 | 2.898914000  | H | -2.755085000 | -4.446653000 | 0.817801000  |
| H | -2.751302000 | -4.440796000 | 0.812825000  | H | -1.974488000 | -2.762874000 | -1.615247000 |
| H | -1.973017000 | -2.749678000 | -1.612863000 | H | -3.082689000 | -2.544435000 | -3.837943000 |
| H | -3.080847000 | -2.518894000 | -3.833854000 | H | -5.560975000 | -2.809167000 | -4.010537000 |
| H | -5.559370000 | -2.781331000 | -4.008326000 | H | -6.905692000 | -3.239153000 | -1.970838000 |
| H | -6.904593000 | -3.220859000 | -1.970959000 | H | -6.950918000 | -3.562218000 | 0.410022000  |
| H | -6.950231000 | -3.556533000 | 0.407606000  | H | -7.371002000 | -3.237798000 | 2.751922000  |
| H | -7.371235000 | -3.247877000 | 2.751111000  | H | -6.453171000 | -2.831025000 | 5.018942000  |
| H | -6.454354000 | -2.854576000 | 5.020980000  | H | -3.987444000 | -2.601378000 | 5.343834000  |
| H | -3.988997000 | -2.624216000 | 5.347737000  | H | -2.467330000 | -2.822632000 | 3.386970000  |
| H | -2.468053000 | -2.832027000 | 3.390252000  | H | -3.232105000 | 0.541330000  | 2.952541000  |
| H | -3.232487000 | 0.547223000  | 2.951896000  | H | 3.171694000  | -0.429079000 | 3.039091000  |
| H | 3.172769000  | -0.420044000 | 3.040799000  | H | 2.919368000  | 0.092976000  | -3.410085000 |
| H | 2.918908000  | 0.079970000  | -3.410885000 | N | -5.950907000 | -3.477740000 | 0.508817000  |
| N | -5.950290000 | -3.471782000 | 0.507194000  |   |              |              |              |

#### <sup>4</sup>R<sub>10</sub>:

|    |              |              |              |
|----|--------------|--------------|--------------|
| Fe | 0.036425000  | -0.084885000 | -0.012362000 |
| N  | 0.002658000  | 0.100980000  | 1.909483000  |
| N  | 1.965407000  | -0.051034000 | -0.122171000 |
| N  | -0.060238000 | 0.410536000  | -1.852070000 |
| N  | -1.758894000 | 0.546585000  | -0.087024000 |
| C  | -1.125255000 | 0.230781000  | 2.699535000  |
| C  | -0.733305000 | 0.105583000  | 4.080775000  |
| C  | 0.630341000  | -0.100577000 | 4.110835000  |
| C  | 1.092765000  | -0.106728000 | 2.746352000  |
| C  | 2.824444000  | -0.238167000 | 0.948637000  |
| C  | 4.167476000  | -0.367724000 | 0.446398000  |
| C  | 4.102497000  | -0.261552000 | -0.927707000 |
| C  | 2.721118000  | -0.064051000 | -1.285145000 |
| C  | 0.868214000  | 0.369392000  | -2.876264000 |
| C  | 0.161823000  | 0.669675000  | -4.098798000 |
| C  | -1.173919000 | 0.889433000  | -3.773202000 |
| C  | -1.290243000 | 0.719115000  | -2.356197000 |
| C  | -2.287087000 | 0.797640000  | -1.318593000 |
| C  | -3.685764000 | 1.080879000  | -1.169813000 |
| C  | -3.976182000 | 0.981619000  | 0.184169000  |
| C  | -2.749442000 | 0.646377000  | 0.876118000  |
| C  | -2.439008000 | 0.474704000  | 2.215808000  |
| C  | 2.403529000  | -0.273091000 | 2.287693000  |
| C  | 2.207483000  | 0.121744000  | -2.591262000 |
| H  | -1.406492000 | 0.176276000  | 4.922784000  |
| H  | 1.257666000  | -0.229304000 | 4.980968000  |
| H  | 5.048221000  | -0.515327000 | 1.054339000  |
| H  | 4.923229000  | -0.304789000 | -1.629160000 |
| H  | 0.604934000  | 0.727311000  | -5.082528000 |

### <sup>2</sup>TS<sub>1</sub>:

|    |              |              |              |
|----|--------------|--------------|--------------|
| Fe | -0.026351000 | 0.027830000  | -0.183491000 |
| N  | -0.127550000 | -0.080233000 | 1.754214000  |
| N  | 1.904253000  | -0.014506000 | -0.202096000 |
| N  | 0.022656000  | 0.943195000  | -1.862544000 |
| N  | -1.742968000 | 0.866852000  | -0.171817000 |
| C  | -1.282031000 | 0.000288000  | 2.527119000  |
| C  | -0.960109000 | -0.415867000 | 3.870145000  |
| C  | 0.377301000  | -0.741501000 | 3.899191000  |
| C  | 0.899751000  | -0.533294000 | 2.572725000  |
| C  | 2.697485000  | -0.466168000 | 0.847017000  |
| C  | 4.052633000  | -0.595317000 | 0.377232000  |
| C  | 4.065004000  | -0.226678000 | -0.949418000 |
| C  | 2.719957000  | 0.139312000  | -1.316622000 |
| C  | 0.994337000  | 1.026568000  | -2.846022000 |
| C  | 0.373060000  | 1.614409000  | -4.007801000 |
| C  | -0.955730000 | 1.872251000  | -3.694253000 |
| C  | -1.159353000 | 1.443548000  | -2.341078000 |
| C  | -2.190983000 | 1.399736000  | -1.356076000 |
| C  | -3.563968000 | 1.771226000  | -1.193854000 |
| C  | -3.922441000 | 1.454342000  | 0.112776000  |
| C  | -2.767734000 | 0.888515000  | 0.762940000  |
| C  | -2.534885000 | 0.450608000  | 2.063673000  |
| C  | 2.215417000  | -0.720022000 | 2.134777000  |
| C  | 2.294579000  | 0.617133000  | -2.574333000 |
| H  | -1.661715000 | -0.444461000 | 4.691578000  |
| H  | 0.953510000  | -1.086694000 | 4.745429000  |
| H  | 4.888776000  | -0.920786000 | 0.979010000  |
| H  | 4.915560000  | -0.195216000 | -1.615083000 |
| H  | 0.868436000  | 1.822156000  | -4.945273000 |
| H  | -1.697516000 | 2.320916000  | -4.338066000 |
| H  | -4.193094000 | 2.226076000  | -1.944462000 |
| H  | -4.886523000 | 1.612668000  | 0.574434000  |
| O  | -0.355912000 | -1.663493000 | -0.653602000 |
| H  | -1.418478000 | -2.193512000 | -0.693026000 |
| C  | -2.598522000 | -2.782125000 | -0.736805000 |
| H  | -2.579527000 | -3.240863000 | -1.728338000 |
| H  | -3.350090000 | 0.479049000  | 2.779524000  |
| H  | 2.933184000  | -1.074729000 | 2.868059000  |
| H  | 3.043061000  | 0.692573000  | -3.356357000 |
| H  | -3.284588000 | -1.934024000 | -0.680813000 |
| C  | -2.639500000 | -3.740097000 | 0.431280000  |
| H  | -1.840277000 | -4.486208000 | 0.365002000  |
| H  | -2.533298000 | -3.211489000 | 1.384900000  |
| H  | -3.597324000 | -4.283994000 | 0.458512000  |

### <sup>4</sup>TS<sub>1</sub>:

|    |              |              |              |
|----|--------------|--------------|--------------|
| Fe | 0.054277000  | 0.116980000  | 0.083641000  |
| N  | 0.008282000  | 0.060828000  | 2.018108000  |
| N  | 1.988722000  | 0.062681000  | -0.000218000 |
| N  | 0.023413000  | 0.922454000  | -1.637986000 |
| N  | -1.704437000 | 0.835207000  | 0.084310000  |
| C  | -1.126677000 | 0.136660000  | 2.815871000  |
| C  | -0.761681000 | -0.218871000 | 4.163231000  |
| C  | 0.585426000  | -0.514071000 | 4.167300000  |
| C  | 1.065925000  | -0.343335000 | 2.820679000  |
| C  | 2.818301000  | -0.335841000 | 1.040159000  |
| C  | 4.158361000  | -0.475922000 | 0.530389000  |

|   |              |              |              |
|---|--------------|--------------|--------------|
| C | 4.121198000  | -0.161065000 | -0.812966000 |
| C | 2.760607000  | 0.177299000  | -1.142730000 |
| C | 0.970429000  | 0.979824000  | -2.651588000 |
| C | 0.298256000  | 1.498384000  | -3.826856000 |
| C | -1.023847000 | 1.736680000  | -3.489612000 |
| C | -1.181603000 | 1.362140000  | -2.107782000 |
| C | -2.192894000 | 1.326301000  | -1.097746000 |
| C | -3.567887000 | 1.690557000  | -0.905992000 |
| C | -3.882765000 | 1.414828000  | 0.418981000  |
| C | -2.698382000 | 0.885759000  | 1.052187000  |
| C | -2.408230000 | 0.523573000  | 2.363952000  |
| C | 2.375337000  | -0.531926000 | 2.351858000  |
| C | 2.280702000  | 0.603724000  | -2.409706000 |
| H | -1.440410000 | -0.237274000 | 5.003928000  |
| H | 1.190359000  | -0.817641000 | 5.009493000  |
| H | 5.018829000  | -0.772319000 | 1.112880000  |
| H | 4.948180000  | -0.152255000 | -1.508321000 |
| H | 0.763255000  | 1.673002000  | -4.786462000 |
| H | -1.795585000 | 2.133251000  | -4.132371000 |
| H | -4.223313000 | 2.116691000  | -1.651085000 |
| H | -4.831096000 | 1.586689000  | 0.907395000  |
| O | -0.389621000 | -1.534582000 | -0.333200000 |
| H | -1.392193000 | -1.897583000 | -0.656781000 |
| C | -2.628500000 | -2.538249000 | -1.028996000 |
| H | -2.346488000 | -2.981790000 | -1.985368000 |
| H | -3.201637000 | 0.565385000  | 3.103734000  |
| H | 3.116309000  | -0.845615000 | 3.081010000  |
| H | 3.000685000  | 0.656019000  | -3.219860000 |
| C | -2.932126000 | -3.491368000 | 0.098039000  |
| H | -2.139934000 | -4.238831000 | 0.215618000  |
| H | -3.042614000 | -2.961487000 | 1.050720000  |
| H | -3.873362000 | -4.036868000 | -0.084645000 |
| H | -3.279875000 | -1.667406000 | -1.125447000 |

### <sup>2</sup>TS<sub>2</sub>:

|    |              |              |              |
|----|--------------|--------------|--------------|
| Fe | 0.078674000  | 0.046548000  | 0.139258000  |
| N  | 0.020564000  | 0.146897000  | 2.076302000  |
| N  | 2.006022000  | 0.108147000  | 0.075180000  |
| N  | 0.041389000  | 0.768905000  | -1.632536000 |
| N  | -1.682881000 | 0.784173000  | 0.100607000  |
| C  | -1.121290000 | 0.248206000  | 2.864628000  |
| C  | -0.749552000 | 0.006407000  | 4.237271000  |
| C  | 0.604601000  | -0.238074000 | 4.268298000  |
| C  | 1.088382000  | -0.152513000 | 2.913616000  |
| C  | 2.844427000  | -0.181283000 | 1.145915000  |
| C  | 4.194380000  | -0.292430000 | 0.657213000  |
| C  | 4.159218000  | -0.074687000 | -0.701977000 |
| C  | 2.789055000  | 0.176689000  | -1.071978000 |
| C  | 0.986633000  | 0.791838000  | -2.644843000 |
| C  | 0.310334000  | 1.209655000  | -3.848105000 |
| C  | -1.024264000 | 1.432126000  | -3.530154000 |
| C  | -1.176597000 | 1.149312000  | -2.133006000 |
| C  | -2.184056000 | 1.158779000  | -1.122744000 |
| C  | -3.573345000 | 1.466873000  | -0.966878000 |
| C  | -3.887556000 | 1.274241000  | 0.374940000  |
| C  | -2.689780000 | 0.848669000  | 1.052663000  |
| C  | -2.407250000 | 0.570679000  | 2.387066000  |
| C  | 2.403333000  | -0.315237000 | 2.466184000  |
| C  | 2.313102000  | 0.485089000  | -2.363141000 |
| H  | -1.432678000 | 0.031202000  | 5.074219000  |
| H  | 1.216435000  | -0.452298000 | 5.132606000  |
| H  | 5.059241000  | -0.504813000 | 1.268838000  |
| H  | 4.992760000  | -0.074213000 | -1.389577000 |
| H  | 0.774126000  | 1.335475000  | -4.815854000 |

|   |              |              |              |
|---|--------------|--------------|--------------|
| H | -1.802172000 | 1.766612000  | -4.200325000 |
| H | -4.242030000 | 1.802088000  | -1.745760000 |
| H | -4.850488000 | 1.426324000  | 0.841045000  |
| O | -0.144833000 | -1.695631000 | -0.119928000 |
| H | -1.233229000 | -2.272222000 | -0.353375000 |
| C | -2.294759000 | -2.909150000 | -0.603653000 |
| H | -3.208851000 | 0.632233000  | 3.116015000  |
| H | 3.154200000  | -0.546932000 | 3.215253000  |
| H | 3.040445000  | 0.510874000  | -3.168002000 |
| C | -2.707717000 | -3.545035000 | 0.712431000  |
| H | -1.942995000 | -4.245160000 | 1.068482000  |
| H | -2.868155000 | -2.789918000 | 1.488981000  |
| H | -3.645790000 | -4.109646000 | 0.592014000  |
| H | -2.967730000 | -2.103541000 | -0.921175000 |
| C | -1.931039000 | -3.859823000 | -1.730532000 |
| H | -2.810387000 | -4.444427000 | -2.044145000 |
| H | -1.558813000 | -3.318458000 | -2.606476000 |
| H | -1.157288000 | -4.568323000 | -1.413037000 |

**<sup>4</sup>TS<sub>2</sub>:**

|    |              |              |              |
|----|--------------|--------------|--------------|
| Fe | -0.235083000 | 0.216042000  | 0.094581000  |
| N  | -0.291772000 | 0.269673000  | 2.049553000  |
| N  | 1.689047000  | -0.120461000 | 0.043011000  |
| N  | -0.111999000 | 0.960316000  | -1.674926000 |
| N  | -1.828237000 | 1.296506000  | 0.061510000  |
| C  | -1.382440000 | 0.614553000  | 2.829674000  |
| C  | -1.072931000 | 0.306407000  | 4.204122000  |
| C  | 0.204581000  | -0.214343000 | 4.236538000  |
| C  | 0.694035000  | -0.231623000 | 2.880479000  |
| C  | 2.437776000  | -0.578764000 | 1.112299000  |
| C  | 3.753810000  | -0.925959000 | 0.635766000  |
| C  | 3.780595000  | -0.665423000 | -0.718783000 |
| C  | 2.483363000  | -0.155372000 | -1.089535000 |
| C  | 0.843926000  | 0.846507000  | -2.664280000 |
| C  | 0.295321000  | 1.459774000  | -3.852429000 |
| C  | -0.971683000 | 1.940831000  | -3.534557000 |
| C  | -1.205253000 | 1.616268000  | -2.158105000 |
| C  | -2.209610000 | 1.815346000  | -1.140898000 |
| C  | -3.487213000 | 2.444808000  | -0.982261000 |
| C  | -3.850714000 | 2.288022000  | 0.352611000  |
| C  | -2.787959000 | 1.568083000  | 1.016177000  |
| C  | -2.572987000 | 1.212843000  | 2.346280000  |
| C  | 1.960296000  | -0.643447000 | 2.431603000  |
| C  | 2.085897000  | 0.284711000  | -2.377064000 |
| H  | -1.734478000 | 0.475657000  | 5.041691000  |
| H  | 0.759417000  | -0.542243000 | 5.103841000  |
| H  | 4.557941000  | -1.307229000 | 1.248570000  |
| H  | 4.611854000  | -0.797440000 | -1.396511000 |
| H  | 0.797490000  | 1.543662000  | -4.805632000 |
| H  | -1.648866000 | 2.465761000  | -4.191468000 |
| H  | -4.050769000 | 2.950730000  | -1.751767000 |
| H  | -4.751434000 | 2.654743000  | 0.823844000  |
| O  | -0.832600000 | -1.425176000 | -0.223693000 |
| H  | -1.364912000 | -2.405213000 | -0.265434000 |
| C  | -1.943089000 | -3.681146000 | -0.342579000 |
| H  | -3.342278000 | 1.440502000  | 3.077517000  |
| H  | 2.647722000  | -1.019722000 | 3.183338000  |
| H  | 2.820452000  | 0.208682000  | -3.172606000 |
| C  | -1.280368000 | -4.442824000 | 0.782819000  |
| H  | -0.195625000 | -4.501067000 | 0.631848000  |
| H  | -1.464115000 | -3.968419000 | 1.752708000  |
| H  | -1.660714000 | -5.476873000 | 0.839258000  |
| H  | -2.989656000 | -3.417512000 | -0.156811000 |
| C  | -1.651451000 | -4.126346000 | -1.757509000 |

|   |              |              |              |
|---|--------------|--------------|--------------|
| H | -2.068604000 | -5.129186000 | -1.951304000 |
| H | -2.083917000 | -3.439349000 | -2.492547000 |
| H | -0.570968000 | -4.181061000 | -1.937114000 |

**<sup>2</sup>TS<sub>3</sub>:**

|    |              |              |              |
|----|--------------|--------------|--------------|
| Fe | -0.010641000 | 0.177038000  | 0.115287000  |
| N  | -0.057903000 | 0.327874000  | 2.045813000  |
| N  | 1.918117000  | 0.148087000  | 0.043552000  |
| N  | -0.021920000 | 0.850559000  | -1.679218000 |
| N  | -1.736272000 | 1.005009000  | 0.059522000  |
| C  | -1.188841000 | 0.510365000  | 2.832663000  |
| C  | -0.825510000 | 0.287718000  | 4.210615000  |
| C  | 0.514205000  | -0.026713000 | 4.245502000  |
| C  | 0.996334000  | -0.003239000 | 2.887785000  |
| C  | 2.743951000  | -0.158037000 | 1.117492000  |
| C  | 4.085754000  | -0.344815000 | 0.629462000  |
| C  | 4.056678000  | -0.156219000 | -0.734573000 |
| C  | 2.698671000  | 0.151166000  | -1.106774000 |
| C  | 0.920567000  | 0.805702000  | -2.693169000 |
| C  | 0.262465000  | 1.228749000  | -3.904391000 |
| C  | -1.058994000 | 1.524790000  | -3.588412000 |
| C  | -1.219660000 | 1.281573000  | -2.185325000 |
| C  | -2.221640000 | 1.372548000  | -1.170175000 |
| C  | -3.590900000 | 1.763394000  | -1.019140000 |
| C  | -3.908397000 | 1.625118000  | 0.329246000  |
| C  | -2.732077000 | 1.150401000  | 1.012955000  |
| C  | -2.458543000 | 0.890261000  | 2.351737000  |
| C  | 2.299924000  | -0.242237000 | 2.441915000  |
| C  | 2.232991000  | 0.447294000  | -2.404977000 |
| H  | -1.503778000 | 0.370848000  | 5.047647000  |
| H  | 1.117390000  | -0.248129000 | 5.114048000  |
| H  | 4.941443000  | -0.583846000 | 1.244140000  |
| H  | 4.887176000  | -0.210421000 | -1.423737000 |
| H  | 0.728834000  | 1.310487000  | -4.875631000 |
| H  | -1.821102000 | 1.883628000  | -4.264123000 |
| H  | -4.242447000 | 2.117245000  | -1.804375000 |
| H  | -4.857881000 | 1.845654000  | 0.795585000  |
| O  | -0.297788000 | -1.537695000 | -0.072486000 |
| H  | -1.313792000 | -2.212870000 | -0.490943000 |
| C  | -2.193033000 | -2.914236000 | -1.036093000 |
| H  | -1.619949000 | -3.795401000 | -1.333294000 |
| H  | -3.252216000 | 1.009391000  | 3.081948000  |
| H  | 3.040420000  | -0.494526000 | 3.194650000  |
| H  | 2.958830000  | 0.419969000  | -3.211215000 |
| H  | -2.473376000 | -2.304242000 | -1.897839000 |
| C  | -3.281717000 | -3.174374000 | -0.079409000 |
| C  | -4.385349000 | -2.296004000 | 0.022280000  |
| C  | -3.236557000 | -4.291521000 | 0.786208000  |
| C  | -5.407095000 | -2.534148000 | 0.942807000  |
| H  | -4.429913000 | -1.425087000 | -0.624772000 |
| C  | -4.258662000 | -4.528049000 | 1.705989000  |
| H  | -2.390578000 | -4.970085000 | 0.727527000  |
| C  | -5.349738000 | -3.651008000 | 1.788018000  |
| H  | -6.249727000 | -1.851914000 | 1.001791000  |
| H  | -4.208428000 | -5.394262000 | 2.358475000  |
| H  | -6.145869000 | -3.836440000 | 2.502278000  |

**<sup>4</sup>TS<sub>3</sub>:**

|    |              |             |              |
|----|--------------|-------------|--------------|
| Fe | 0.016723000  | 0.164086000 | 0.114810000  |
| N  | -0.020120000 | 0.240062000 | 2.047031000  |
| N  | 1.950032000  | 0.103955000 | 0.031370000  |
| N  | -0.007595000 | 0.860724000 | -1.655566000 |
| N  | -1.721145000 | 0.930560000 | 0.079523000  |
| C  | -1.148262000 | 0.387991000 | 2.843190000  |

|   |              |              |              |
|---|--------------|--------------|--------------|
| C | -0.783970000 | 0.110398000  | 4.208773000  |
| C | 0.556943000  | -0.209182000 | 4.227370000  |
| C | 1.035289000  | -0.131511000 | 2.871543000  |
| C | 2.777154000  | -0.249946000 | 1.089963000  |
| C | 4.110845000  | -0.447673000 | 0.586100000  |
| C | 4.074207000  | -0.216084000 | -0.773936000 |
| C | 2.720102000  | 0.127589000  | -1.120943000 |
| C | 0.936349000  | 0.847491000  | -2.673950000 |
| C | 0.271179000  | 1.311018000  | -3.872670000 |
| C | -1.045873000 | 1.594632000  | -3.544914000 |
| C | -1.205206000 | 1.301892000  | -2.146015000 |
| C | -2.206969000 | 1.355264000  | -1.129067000 |
| C | -3.569740000 | 1.769127000  | -0.952713000 |
| C | -3.881317000 | 1.588272000  | 0.389211000  |
| C | -2.707427000 | 1.068542000  | 1.048685000  |
| C | -2.422875000 | 0.779858000  | 2.376658000  |
| C | 2.337434000  | -0.365709000 | 2.413039000  |
| C | 2.244311000  | 0.474375000  | -2.409949000 |
| H | -1.460067000 | 0.157727000  | 5.050338000  |
| H | 1.160143000  | -0.470154000 | 5.084945000  |
| H | 4.967180000  | -0.725157000 | 1.183726000  |
| H | 4.897980000  | -0.267388000 | -1.471321000 |
| H | 0.736324000  | 1.425377000  | -4.841202000 |
| H | -1.811016000 | 1.973292000  | -4.206202000 |
| H | -4.217803000 | 2.166641000  | -1.719844000 |
| H | -4.820359000 | 1.816871000  | 0.872210000  |
| O | -0.399465000 | -1.486160000 | -0.185805000 |
| H | -1.360608000 | -2.042973000 | -0.562667000 |
| C | -2.323933000 | -2.841510000 | -1.123593000 |
| H | -1.705430000 | -3.698284000 | -1.392813000 |
| H | -3.211358000 | 0.883033000  | 3.115066000  |
| H | 3.077012000  | -0.649072000 | 3.155762000  |
| H | 2.963380000  | 0.467542000  | -3.222592000 |
| H | -2.601835000 | -2.225296000 | -1.979813000 |
| C | -3.362852000 | -3.077159000 | -0.130004000 |
| C | -4.476548000 | -2.206725000 | -0.015269000 |
| C | -3.273254000 | -4.162178000 | 0.778904000  |
| C | -5.456579000 | -2.420101000 | 0.953423000  |
| H | -4.556235000 | -1.361163000 | -0.691580000 |
| C | -4.254791000 | -4.371679000 | 1.745986000  |
| H | -2.422420000 | -4.833904000 | 0.712800000  |
| C | -5.352990000 | -3.502940000 | 1.838854000  |
| H | -6.304426000 | -1.744930000 | 1.020028000  |
| H | -4.168936000 | -5.211400000 | 2.428824000  |
| H | -6.117727000 | -3.668690000 | 2.591160000  |

#### <sup>2</sup>TS<sub>4</sub>:

|    |              |              |              |
|----|--------------|--------------|--------------|
| Fe | 0.041768000  | 0.070974000  | 0.114165000  |
| N  | 0.033098000  | 0.051281000  | 2.050820000  |
| N  | 1.967740000  | 0.069084000  | 0.001188000  |
| N  | -0.014728000 | 0.896165000  | -1.614878000 |
| N  | -1.692038000 | 0.880236000  | 0.166038000  |
| C  | -1.082075000 | 0.152873000  | 2.873279000  |
| C  | -0.686774000 | -0.179909000 | 4.219822000  |
| C  | 0.656760000  | -0.479711000 | 4.200556000  |
| C  | 1.109220000  | -0.336407000 | 2.840146000  |
| C  | 2.819506000  | -0.317548000 | 1.027490000  |
| C  | 4.152550000  | -0.443883000 | 0.498220000  |
| C  | 4.092283000  | -0.139040000 | -0.843704000 |
| C  | 2.723509000  | 0.181477000  | -1.160476000 |
| C  | 0.905249000  | 0.947921000  | -2.648551000 |
| C  | 0.215904000  | 1.461306000  | -3.806071000 |
| C  | -1.101947000 | 1.711691000  | -3.438814000 |
| C  | -1.228580000 | 1.350595000  | -2.058112000 |

|   |              |              |              |
|---|--------------|--------------|--------------|
| C | -2.209569000 | 1.339372000  | -1.018495000 |
| C | -3.583908000 | 1.683775000  | -0.810640000 |
| C | -3.872223000 | 1.422864000  | 0.525532000  |
| C | -2.672050000 | 0.920067000  | 1.145998000  |
| C | -2.367483000 | 0.552586000  | 2.451520000  |
| C | 2.404869000  | -0.520456000 | 2.349070000  |
| C | 2.227366000  | 0.581914000  | -2.418631000 |
| H | -1.347242000 | -0.174795000 | 5.075034000  |
| H | 1.281018000  | -0.765351000 | 5.034791000  |
| H | 5.023864000  | -0.723529000 | 1.072470000  |
| H | 4.908522000  | -0.122549000 | -1.551569000 |
| H | 0.659743000  | 1.629850000  | -4.776685000 |
| H | -1.883060000 | 2.114576000  | -4.066263000 |
| H | -4.258621000 | 2.086452000  | -1.551494000 |
| H | -4.817547000 | 1.578991000  | 1.025060000  |
| O | -0.231151000 | -1.617432000 | -0.224687000 |
| H | -1.270582000 | -2.267581000 | -0.686439000 |
| C | -2.161813000 | -2.910989000 | -1.260543000 |
| C | -3.269136000 | -3.134563000 | -0.325573000 |
| C | -4.406391000 | -2.405511000 | -0.288082000 |
| H | -1.617211000 | -3.811178000 | -1.557425000 |
| H | -3.147503000 | 0.595867000  | 3.204612000  |
| H | 3.164352000  | -0.826592000 | 3.061843000  |
| H | 2.936040000  | 0.631630000  | -3.238961000 |
| H | -3.134344000 | -3.933859000 | 0.403313000  |
| H | -5.190079000 | -2.605406000 | 0.436183000  |
| H | -4.581589000 | -1.588671000 | -0.983045000 |
| H | -2.407615000 | -2.282207000 | -2.120368000 |

#### <sup>4</sup>TS<sub>4</sub>:

|    |              |              |              |
|----|--------------|--------------|--------------|
| Fe | 0.054424000  | 0.078740000  | 0.163233000  |
| N  | 0.069438000  | 0.080306000  | 2.098161000  |
| N  | 1.985692000  | 0.073166000  | 0.025647000  |
| N  | -0.040931000 | 0.825146000  | -1.583393000 |
| N  | -1.701857000 | 0.800202000  | 0.202534000  |
| C  | -1.039034000 | 0.167818000  | 2.927428000  |
| C  | -0.630176000 | -0.142931000 | 4.272834000  |
| C  | 0.720213000  | -0.422195000 | 4.245372000  |
| C  | 1.158448000  | -0.285757000 | 2.880844000  |
| C  | 2.851740000  | -0.291561000 | 1.048146000  |
| C  | 4.176176000  | -0.430630000 | 0.502785000  |
| C  | 4.095257000  | -0.152813000 | -0.846862000 |
| C  | 2.722597000  | 0.160505000  | -1.145490000 |
| C  | 0.874812000  | 0.877021000  | -2.626157000 |
| C  | 0.165506000  | 1.366165000  | -3.787742000 |
| C  | -1.149399000 | 1.602346000  | -3.414042000 |
| C  | -1.261863000 | 1.254590000  | -2.024007000 |
| C  | -2.234294000 | 1.246320000  | -0.976165000 |
| C  | -3.608084000 | 1.600320000  | -0.752151000 |
| C  | -3.878716000 | 1.357427000  | 0.587679000  |
| C  | -2.667567000 | 0.861575000  | 1.200324000  |
| C  | -2.339723000 | 0.535093000  | 2.507467000  |
| C  | 2.452611000  | -0.465011000 | 2.379232000  |
| C  | 2.200740000  | 0.535597000  | -2.408077000 |
| H  | -1.283564000 | -0.143018000 | 5.133467000  |
| H  | 1.353866000  | -0.692654000 | 5.077690000  |
| H  | 5.056725000  | -0.701712000 | 1.067200000  |
| H  | 4.900771000  | -0.154386000 | -1.567098000 |
| H  | 0.600649000  | 1.530253000  | -4.763033000 |
| H  | -1.941627000 | 1.985882000  | -4.039680000 |
| H  | -4.290772000 | 1.997140000  | -1.489022000 |
| H  | -4.813993000 | 1.529107000  | 1.100609000  |
| O  | -0.332373000 | -1.562980000 | -0.191863000 |
| H  | -1.266166000 | -2.096431000 | -0.714509000 |

|   |              |              |              |
|---|--------------|--------------|--------------|
| C | -2.182997000 | -2.819812000 | -1.392724000 |
| C | -3.296825000 | -3.066844000 | -0.497555000 |
| C | -4.440617000 | -2.336303000 | -0.450936000 |
| H | -1.561931000 | -3.680195000 | -1.646375000 |
| H | -3.110599000 | 0.585778000  | 3.269664000  |
| H | 3.221467000  | -0.750424000 | 3.090794000  |
| H | 2.897537000  | 0.579990000  | -3.238865000 |
| H | -3.176429000 | -3.885994000 | 0.211813000  |
| H | -5.230975000 | -2.557787000 | 0.259195000  |
| H | -4.607927000 | -1.500180000 | -1.123954000 |
| H | -2.382130000 | -2.166485000 | -2.244772000 |

<sup>2</sup>TS<sub>5</sub>:

|    |              |              |              |
|----|--------------|--------------|--------------|
| Fe | 0.067321000  | 0.032390000  | -0.006184000 |
| N  | -0.067511000 | 0.012259000  | 1.931040000  |
| N  | 1.995642000  | 0.115757000  | 0.007533000  |
| N  | 0.086943000  | 0.857490000  | -1.734923000 |
| N  | -1.702865000 | 0.767453000  | -0.067175000 |
| C  | -1.237565000 | 0.065492000  | 2.678558000  |
| C  | -0.917301000 | -0.249741000 | 4.048956000  |
| C  | 0.437359000  | -0.489023000 | 4.118016000  |
| C  | 0.969909000  | -0.325521000 | 2.789204000  |
| C  | 2.794133000  | -0.229458000 | 1.090612000  |
| C  | 4.163945000  | -0.293030000 | 0.650947000  |
| C  | 4.177972000  | 0.008395000  | -0.693385000 |
| C  | 2.819020000  | 0.263461000  | -1.099861000 |
| C  | 1.070397000  | 0.953718000  | -2.705248000 |
| C  | 0.436939000  | 1.448591000  | -3.904227000 |
| C  | -0.909316000 | 1.644475000  | -3.622219000 |
| C  | -1.110553000 | 1.267088000  | -2.253453000 |
| C  | -2.158052000 | 1.212133000  | -1.280855000 |
| C  | -3.555374000 | 1.502903000  | -1.163769000 |
| C  | -3.921098000 | 1.225313000  | 0.150087000  |
| C  | -2.744785000 | 0.766238000  | 0.846955000  |
| C  | -2.508833000 | 0.410225000  | 2.171495000  |
| C  | 2.303553000  | -0.449625000 | 2.382308000  |
| C  | 2.387628000  | 0.644208000  | -2.390568000 |
| H  | -1.631407000 | -0.273472000 | 4.859672000  |
| H  | 1.017752000  | -0.745778000 | 4.992377000  |
| H  | 5.007926000  | -0.529664000 | 1.282571000  |
| H  | 5.037544000  | 0.063750000  | -1.345797000 |
| H  | 0.935918000  | 1.641000000  | -4.843065000 |
| H  | -1.664949000 | 2.017411000  | -4.297268000 |
| H  | -4.195112000 | 1.880167000  | -1.947610000 |
| H  | -4.902261000 | 1.345021000  | 0.586905000  |
| O  | -0.096064000 | -1.658841000 | -0.361993000 |
| H  | -1.022245000 | -2.518223000 | -0.731029000 |
| C  | -1.831072000 | -3.430495000 | -0.930072000 |
| H  | -1.163978000 | -4.299875000 | -0.910043000 |
| H  | -3.336984000 | 0.422444000  | 2.872876000  |
| H  | 3.028259000  | -0.718744000 | 3.144651000  |
| H  | 3.145904000  | 0.727491000  | -3.162378000 |
| C  | -2.758230000 | -3.395765000 | 0.280639000  |
| H  | -2.182579000 | -3.547207000 | 1.198805000  |
| H  | -3.275492000 | -2.434991000 | 0.373523000  |
| H  | -3.519884000 | -4.185560000 | 0.217498000  |
| C  | -2.409425000 | -3.223505000 | -2.283730000 |
| C  | -1.771525000 | -3.791415000 | -3.410037000 |
| C  | -3.567565000 | -2.445604000 | -2.501982000 |
| C  | -2.275049000 | -3.602869000 | -4.697756000 |
| H  | -0.874165000 | -4.385416000 | -3.261151000 |
| C  | -4.072155000 | -2.257847000 | -3.791011000 |
| H  | -4.071487000 | -1.982417000 | -1.660960000 |
| C  | -3.431121000 | -2.835671000 | -4.894752000 |

|   |              |              |              |
|---|--------------|--------------|--------------|
| H | -1.770290000 | -4.053949000 | -5.546596000 |
| H | -4.967165000 | -1.660180000 | -3.935893000 |
| H | -3.826252000 | -2.689195000 | -5.895163000 |

<sup>4</sup>TS<sub>5</sub>:

|    |              |              |              |
|----|--------------|--------------|--------------|
| Fe | 0.112612000  | 0.024874000  | -0.040389000 |
| N  | -0.084590000 | 0.016375000  | 1.884051000  |
| N  | 2.043546000  | 0.133771000  | 0.035540000  |
| N  | 0.172977000  | 0.807516000  | -1.773744000 |
| N  | -1.676280000 | 0.652603000  | -0.188072000 |
| C  | -1.282542000 | 0.040725000  | 2.591442000  |
| C  | -1.002686000 | -0.259252000 | 3.972759000  |
| C  | 0.354677000  | -0.466638000 | 4.089468000  |
| C  | 0.929157000  | -0.296726000 | 2.779853000  |
| C  | 2.811502000  | -0.193022000 | 1.147869000  |
| C  | 4.194367000  | -0.254056000 | 0.749340000  |
| C  | 4.246146000  | 0.030858000  | -0.599144000 |
| C  | 2.898200000  | 0.272756000  | -1.045806000 |
| C  | 1.190933000  | 0.915199000  | -2.710499000 |
| C  | 0.583192000  | 1.372874000  | -3.943997000 |
| C  | -0.773853000 | 1.530172000  | -3.715776000 |
| C  | -1.016957000 | 1.165422000  | -2.345164000 |
| C  | -2.098608000 | 1.088550000  | -1.418259000 |
| C  | -3.501494000 | 1.370140000  | -1.344328000 |
| C  | -3.904976000 | 1.102144000  | -0.041157000 |
| C  | -2.746721000 | 0.660316000  | 0.695915000  |
| C  | -2.542740000 | 0.341583000  | 2.035311000  |
| C  | 2.280932000  | -0.401146000 | 2.422633000  |
| C  | 2.500088000  | 0.637569000  | -2.356825000 |
| H  | -1.743557000 | -0.298319000 | 4.758542000  |
| H  | 0.909749000  | -0.707666000 | 4.984567000  |
| H  | 5.021385000  | -0.481767000 | 1.406438000  |
| H  | 5.124273000  | 0.081345000  | -1.226734000 |
| H  | 1.111469000  | 1.563989000  | -4.867000000 |
| H  | -1.516329000 | 1.865942000  | -4.424094000 |
| H  | -4.119440000 | 1.737253000  | -2.150222000 |
| H  | -4.897658000 | 1.226262000  | 0.367284000  |
| O  | -0.123783000 | -1.643296000 | -0.406415000 |
| H  | -0.991035000 | -2.403654000 | -0.715024000 |
| C  | -1.810162000 | -3.444427000 | -0.940363000 |
| H  | -1.046983000 | -4.224321000 | -1.022464000 |
| H  | -3.393271000 | 0.351198000  | 2.709791000  |
| H  | 2.980509000  | -0.650073000 | 3.214788000  |
| H  | 3.279444000  | 0.725570000  | -3.106512000 |
| C  | -2.615940000 | -3.525426000 | 0.345330000  |
| H  | -1.950805000 | -3.688348000 | 1.198627000  |
| H  | -3.176776000 | -2.604521000 | 0.538144000  |
| H  | -3.337014000 | -4.356054000 | 0.311968000  |
| C  | -2.477119000 | -3.164445000 | -2.220552000 |
| C  | -1.835142000 | -3.510539000 | -3.436120000 |
| C  | -3.736838000 | -2.523694000 | -2.299566000 |
| C  | -2.426942000 | -3.239692000 | -4.668492000 |
| H  | -0.863587000 | -3.994820000 | -3.395350000 |
| C  | -4.328460000 | -2.255850000 | -3.535270000 |
| H  | -4.249971000 | -2.233913000 | -1.389745000 |
| C  | -3.679827000 | -2.611311000 | -4.725679000 |
| H  | -1.916844000 | -3.518716000 | -5.585388000 |
| H  | -5.298488000 | -1.769124000 | -3.571715000 |
| H  | -4.143385000 | -2.402392000 | -5.684721000 |

<sup>2</sup>TS<sub>6</sub>:

|    |              |              |              |
|----|--------------|--------------|--------------|
| Fe | -0.627460000 | 0.245498000  | -0.261058000 |
| N  | -0.707539000 | 0.015763000  | 1.662660000  |
| N  | 1.064796000  | -0.690095000 | -0.416480000 |

|   |              |              |              |
|---|--------------|--------------|--------------|
| N | -0.232283000 | 1.148658000  | -1.894539000 |
| N | -1.770382000 | 1.759357000  | -0.091145000 |
| C | -1.668066000 | 0.547116000  | 2.512418000  |
| C | -1.538943000 | -0.085832000 | 3.800331000  |
| C | -0.505980000 | -0.994817000 | 3.718453000  |
| C | 0.015860000  | -0.932040000 | 2.378008000  |
| C | 1.580717000  | -1.556941000 | 0.539299000  |
| C | 2.687695000  | -2.273387000 | -0.036679000 |
| C | 2.832165000  | -1.832157000 | -1.335375000 |
| C | 1.816538000  | -0.840584000 | -1.576399000 |
| C | 0.643376000  | 0.866261000  | -2.928697000 |
| C | 0.329762000  | 1.771801000  | -4.007427000 |
| C | -0.722736000 | 2.579910000  | -3.591284000 |
| C | -1.063023000 | 2.171274000  | -2.261108000 |
| C | -1.962452000 | 2.528901000  | -1.205271000 |
| C | -2.993209000 | 3.484321000  | -0.926148000 |
| C | -3.411275000 | 3.260583000  | 0.380692000  |
| C | -2.631960000 | 2.168126000  | 0.912486000  |
| C | -2.587056000 | 1.562551000  | 2.162347000  |
| C | 1.076434000  | -1.669154000 | 1.841051000  |
| C | 1.620062000  | -0.110539000 | -2.769535000 |
| H | -2.150355000 | 0.138424000  | 4.662639000  |
| H | -0.135989000 | -1.644769000 | 4.497668000  |
| H | 3.283958000  | -3.012568000 | 0.478254000  |
| H | 3.570551000  | -2.148245000 | -2.058295000 |
| H | 0.841448000  | 1.815089000  | -4.958119000 |
| H | -1.192194000 | 3.372741000  | -4.154164000 |
| H | -3.362925000 | 4.238511000  | -1.604550000 |
| H | -4.169454000 | 3.809744000  | 0.920165000  |
| O | -1.745786000 | -0.946437000 | -0.790215000 |
| H | -1.894041000 | -2.224666000 | -0.799298000 |
| H | -3.274755000 | 1.897063000  | 2.932298000  |
| H | 1.556656000  | -2.389380000 | 2.495324000  |
| H | 2.293692000  | -0.317538000 | -3.594889000 |
| H | -0.528654000 | -5.846788000 | 3.629148000  |
| C | -0.906447000 | -5.341051000 | 2.745527000  |
| C | -0.250844000 | -5.512732000 | 1.512961000  |
| C | -2.045860000 | -4.532738000 | 2.842837000  |
| C | -0.758150000 | -4.865515000 | 0.383957000  |
| H | 0.625320000  | -6.151298000 | 1.443160000  |
| C | -2.555975000 | -3.869726000 | 1.709401000  |
| H | -2.541773000 | -4.413931000 | 3.801116000  |
| C | -1.916449000 | -4.039866000 | 0.485346000  |
| C | -0.329220000 | -4.864214000 | -1.017015000 |
| H | -3.430212000 | -3.231808000 | 1.796684000  |
| C | -2.187093000 | -3.455757000 | -0.861924000 |
| C | -1.179806000 | -4.079811000 | -1.746361000 |
| H | 0.521598000  | -5.413545000 | -1.400596000 |
| H | -3.220511000 | -3.385739000 | -1.209388000 |
| H | -1.119772000 | -3.893705000 | -2.810704000 |

#### <sup>4</sup>TS<sub>6</sub>:

|    |              |              |              |
|----|--------------|--------------|--------------|
| Fe | -0.641680000 | 0.253078000  | -0.264156000 |
| N  | -0.745495000 | -0.016554000 | 1.639632000  |
| N  | 0.995283000  | -0.740406000 | -0.439955000 |
| N  | -0.226937000 | 1.165931000  | -1.886099000 |
| N  | -1.754727000 | 1.786602000  | -0.075123000 |
| C  | -1.701469000 | 0.521123000  | 2.494374000  |
| C  | -1.590393000 | -0.134063000 | 3.773547000  |
| C  | -0.576263000 | -1.061198000 | 3.684516000  |
| C  | -0.045562000 | -0.990951000 | 2.347575000  |
| C  | 1.502335000  | -1.623678000 | 0.506065000  |
| C  | 2.599045000  | -2.350399000 | -0.077363000 |
| C  | 2.750210000  | -1.899756000 | -1.370238000 |

|   |              |              |              |
|---|--------------|--------------|--------------|
| C | 1.750200000  | -0.889897000 | -1.604642000 |
| C | 0.626333000  | 0.865717000  | -2.932060000 |
| C | 0.321088000  | 1.775040000  | -4.005192000 |
| C | -0.715327000 | 2.603372000  | -3.577761000 |
| C | -1.046507000 | 2.202925000  | -2.247107000 |
| C | -1.940229000 | 2.564923000  | -1.186916000 |
| C | -2.968150000 | 3.520596000  | -0.908087000 |
| C | -3.393794000 | 3.289490000  | 0.396594000  |
| C | -2.623273000 | 2.188683000  | 0.923392000  |
| C | -2.599541000 | 1.558192000  | 2.161154000  |
| C | 0.998142000  | -1.742353000 | 1.806263000  |
| C | 1.574774000  | -0.144491000 | -2.784984000 |
| H | -2.201850000 | 0.090958000  | 4.635631000  |
| H | -0.223086000 | -1.730135000 | 4.455144000  |
| H | 3.185172000  | -3.100859000 | 0.432588000  |
| H | 3.485986000  | -2.217193000 | -2.095270000 |
| H | 0.820071000  | 1.806745000  | -4.963049000 |
| H | -1.176624000 | 3.403279000  | -4.137400000 |
| H | -3.332369000 | 4.280359000  | -1.583156000 |
| H | -4.157227000 | 3.834166000  | 0.933322000  |
| O | -1.736897000 | -0.945773000 | -0.776490000 |
| H | -1.809255000 | -2.149195000 | -0.773505000 |
| H | -3.288117000 | 1.886648000  | 2.932804000  |
| H | 1.462547000  | -2.480330000 | 2.451422000  |
| H | 2.239764000  | -0.363203000 | -3.614402000 |
| H | -0.448471000 | -5.754519000 | 3.671600000  |
| C | -0.834287000 | -5.270837000 | 2.779169000  |
| C | -0.152849000 | -5.418708000 | 1.558035000  |
| C | -2.012005000 | -4.515359000 | 2.852758000  |
| C | -0.672402000 | -4.804740000 | 0.413457000  |
| H | 0.751935000  | -6.018201000 | 1.505580000  |
| C | -2.534448000 | -3.881362000 | 1.707970000  |
| H | -2.529208000 | -4.416040000 | 3.802030000  |
| C | -1.870575000 | -4.027038000 | 0.492710000  |
| C | -0.227765000 | -4.794503000 | -0.974755000 |
| H | -3.438838000 | -3.284699000 | 1.779889000  |
| C | -2.136760000 | -3.466046000 | -0.854880000 |
| C | -1.112328000 | -4.046442000 | -1.720403000 |
| H | 0.651664000  | -5.303605000 | -1.348186000 |
| H | -3.157714000 | -3.331502000 | -1.212151000 |
| H | -1.050127000 | -3.869472000 | -2.786323000 |

#### <sup>2</sup>TS<sub>7</sub>:

|    |              |              |              |
|----|--------------|--------------|--------------|
| Fe | -0.017694000 | 0.150384000  | 0.022498000  |
| N  | -0.043959000 | -0.036680000 | 1.954297000  |
| N  | 1.907537000  | 0.063948000  | -0.084392000 |
| N  | -0.032027000 | 1.104172000  | -1.635881000 |
| N  | -1.725152000 | 1.015323000  | 0.133364000  |
| C  | -1.159983000 | 0.041784000  | 2.775800000  |
| C  | -0.791621000 | -0.420664000 | 4.090985000  |
| C  | 0.539741000  | -0.773130000 | 4.053355000  |
| C  | 1.008861000  | -0.533096000 | 2.712263000  |
| C  | 2.734090000  | -0.436216000 | 0.911792000  |
| C  | 4.065842000  | -0.572021000 | 0.380756000  |
| C  | 4.027902000  | -0.157141000 | -0.933041000 |
| C  | 2.674594000  | 0.240863000  | -1.227725000 |
| C  | 0.898534000  | 1.205633000  | -2.655074000 |
| C  | 0.243343000  | 1.853751000  | -3.765250000 |
| C  | -1.063903000 | 2.132664000  | -3.381385000 |
| C  | -1.217595000 | 1.652374000  | -2.040084000 |
| C  | -2.209038000 | 1.598855000  | -1.005979000 |
| C  | -3.564535000 | 2.003730000  | -0.769927000 |
| C  | -3.873592000 | 1.645479000  | 0.538125000  |
| C  | -2.704969000 | 1.024018000  | 1.112819000  |

|   |              |              |              |
|---|--------------|--------------|--------------|
| C | -2.425523000 | 0.532798000  | 2.382685000  |
| C | 2.300870000  | -0.727163000 | 2.211924000  |
| C | 2.201682000  | 0.764986000  | -2.451774000 |
| H | -1.458681000 | -0.461256000 | 4.940108000  |
| H | 1.144363000  | -1.153144000 | 4.864177000  |
| H | 4.921993000  | -0.928877000 | 0.934793000  |
| H | 4.850025000  | -0.114639000 | -1.633016000 |
| H | 0.702923000  | 2.089547000  | -4.714257000 |
| H | -1.820547000 | 2.626722000  | -3.972455000 |
| H | -4.211227000 | 2.506083000  | -1.473934000 |
| H | -4.811853000 | 1.807720000  | 1.048615000  |
| O | -0.371936000 | -1.446207000 | -0.470107000 |
| H | -1.287781000 | -2.403592000 | -0.669236000 |
| C | -2.040409000 | -3.366101000 | -0.840892000 |
| C | -3.221850000 | -3.127641000 | 0.030360000  |
| C | -4.333710000 | -2.419824000 | -0.483412000 |
| C | -4.280297000 | -1.889349000 | -1.902375000 |
| C | -3.422991000 | -2.726574000 | -2.830762000 |
| C | -2.317042000 | -3.430466000 | -2.300534000 |
| C | -1.489746000 | -4.166296000 | -3.170304000 |
| C | -1.754832000 | -4.215358000 | -4.539253000 |
| C | -2.859426000 | -3.527268000 | -5.060145000 |
| C | -3.686089000 | -2.790822000 | -4.204942000 |
| C | -3.248707000 | -3.575367000 | 1.364862000  |
| C | -4.358438000 | -3.338372000 | 2.176901000  |
| C | -5.465301000 | -2.649424000 | 1.660761000  |
| C | -5.447291000 | -2.197116000 | 0.337193000  |
| H | -1.409887000 | -4.188971000 | -0.489455000 |
| H | -0.637025000 | -4.700479000 | -2.761053000 |
| H | -1.109760000 | -4.789317000 | -5.197029000 |
| H | -3.076303000 | -3.567181000 | -6.123072000 |
| H | -4.544584000 | -2.259526000 | -4.607648000 |
| H | -3.864628000 | -0.866098000 | -1.870886000 |
| H | -5.294192000 | -1.788013000 | -2.308852000 |
| H | -6.306116000 | -1.666130000 | -0.064906000 |
| H | -6.337365000 | -2.472809000 | 2.282965000  |
| H | -4.367431000 | -3.695886000 | 3.201892000  |
| H | -2.391170000 | -4.114149000 | 1.757698000  |
| H | -3.208816000 | 0.544397000  | 3.133219000  |
| H | 3.042802000  | -1.119264000 | 2.900934000  |
| H | 2.917633000  | 0.853579000  | -3.262552000 |

#### <sup>4</sup>TS<sub>7</sub>:

|    |              |              |              |
|----|--------------|--------------|--------------|
| Fe | -0.008405000 | 0.132497000  | 0.011971000  |
| N  | -0.042584000 | -0.051159000 | 1.935072000  |
| N  | 1.921372000  | 0.066431000  | -0.082699000 |
| N  | -0.016524000 | 1.077564000  | -1.642670000 |
| N  | -1.727811000 | 0.946303000  | 0.097434000  |
| C  | -1.166727000 | 0.014135000  | 2.752596000  |
| C  | -0.800638000 | -0.445290000 | 4.068827000  |
| C  | 0.533570000  | -0.785528000 | 4.038583000  |
| C  | 1.009346000  | -0.540749000 | 2.701113000  |
| C  | 2.745076000  | -0.438948000 | 0.916835000  |
| C  | 4.076182000  | -0.583310000 | 0.387320000  |
| C  | 4.042061000  | -0.170770000 | -0.928055000 |
| C  | 2.692127000  | 0.234453000  | -1.224168000 |
| C  | 0.921376000  | 1.185171000  | -2.657520000 |
| C  | 0.260923000  | 1.816793000  | -3.779055000 |
| C  | -1.051169000 | 2.074717000  | -3.408933000 |
| C  | -1.209848000 | 1.599234000  | -2.063289000 |
| C  | -2.208974000 | 1.533587000  | -1.044283000 |
| C  | -3.564064000 | 1.938797000  | -0.810787000 |
| C  | -3.877418000 | 1.582847000  | 0.496714000  |
| C  | -2.712352000 | 0.963552000  | 1.075738000  |

|   |              |              |              |
|---|--------------|--------------|--------------|
| C | -2.431929000 | 0.487929000  | 2.351925000  |
| C | 2.307002000  | -0.728316000 | 2.211966000  |
| C | 2.223979000  | 0.757857000  | -2.452778000 |
| H | -1.472328000 | -0.492519000 | 4.914011000  |
| H | 1.137114000  | -1.160949000 | 4.852370000  |
| H | 4.929283000  | -0.947495000 | 0.941494000  |
| H | 4.864911000  | -0.136206000 | -1.627609000 |
| H | 0.724235000  | 2.050857000  | -4.726721000 |
| H | -1.812187000 | 2.550417000  | -4.009368000 |
| H | -4.207360000 | 2.444530000  | -1.515739000 |
| H | -4.814765000 | 1.751721000  | 1.006480000  |
| O | -0.420630000 | -1.448286000 | -0.466171000 |
| H | -1.292966000 | -2.302150000 | -0.637519000 |
| C | -2.075069000 | -3.343432000 | -0.829107000 |
| C | -3.237951000 | -3.108098000 | 0.047612000  |
| C | -4.371680000 | -2.426823000 | -0.461579000 |
| C | -4.347938000 | -1.910280000 | -1.885981000 |
| C | -3.453284000 | -2.706067000 | -2.814736000 |
| C | -2.328083000 | -3.382147000 | -2.282123000 |
| C | -1.463139000 | -4.070163000 | -3.158443000 |
| C | -1.710281000 | -4.100970000 | -4.530041000 |
| C | -2.833591000 | -3.442945000 | -5.051699000 |
| C | -3.696353000 | -2.753423000 | -4.192669000 |
| C | -3.238394000 | -3.531831000 | 1.392857000  |
| C | -4.339077000 | -3.298687000 | 2.215869000  |
| C | -5.466295000 | -2.638476000 | 1.703826000  |
| C | -5.475880000 | -2.210183000 | 0.371970000  |
| H | -1.399450000 | -4.125970000 | -0.473526000 |
| H | -0.596517000 | -4.581037000 | -2.748816000 |
| H | -1.037011000 | -4.637594000 | -5.191011000 |
| H | -3.036054000 | -3.469448000 | -6.117804000 |
| H | -4.568131000 | -2.245015000 | -4.596406000 |
| H | -3.984786000 | -0.866700000 | -1.863533000 |
| H | -5.367214000 | -1.861465000 | -2.289391000 |
| H | -6.349703000 | -1.700860000 | -0.025747000 |
| H | -6.331753000 | -2.465369000 | 2.335985000  |
| H | -4.326988000 | -3.637009000 | 3.247277000  |
| H | -2.365739000 | -4.048365000 | 1.782074000  |
| H | -3.218252000 | 0.500830000  | 3.099321000  |
| H | 3.044436000  | -1.117394000 | 2.907437000  |
| H | 2.942010000  | 0.848388000  | -3.261146000 |

#### <sup>2</sup>TS<sub>8</sub>:

|    |              |              |              |
|----|--------------|--------------|--------------|
| Fe | 0.240144000  | -0.260202000 | 0.362340000  |
| N  | 0.409572000  | -0.270396000 | 2.298412000  |
| N  | 2.152919000  | -0.191663000 | 0.078726000  |
| N  | -0.009754000 | 0.526561000  | -1.353063000 |
| N  | -1.522710000 | 0.455524000  | 0.571035000  |
| C  | -0.631074000 | -0.214082000 | 3.217514000  |
| C  | -0.104221000 | -0.525549000 | 4.522213000  |
| C  | 1.246527000  | -0.764106000 | 4.383105000  |
| C  | 1.569275000  | -0.603353000 | 2.989232000  |
| C  | 3.110171000  | -0.524211000 | 1.028745000  |
| C  | 4.395140000  | -0.599429000 | 0.381623000  |
| C  | 4.199887000  | -0.316818000 | -0.952754000 |
| C  | 2.794233000  | -0.061039000 | -1.144978000 |
| C  | 0.812615000  | 0.612065000  | -2.462631000 |
| C  | 0.000343000  | 1.091427000  | -3.555123000 |
| C  | -1.288555000 | 1.286646000  | -3.071897000 |
| C  | -1.276017000 | 0.922781000  | -1.685932000 |
| C  | -2.161194000 | 0.879531000  | -0.561445000 |
| C  | -3.523471000 | 1.180233000  | -0.231296000 |
| C  | -3.678355000 | 0.924315000  | 1.126273000  |
| C  | -2.406845000 | 0.468996000  | 1.636669000  |
| C  | -1.967360000 | 0.129505000  | 2.910984000  |



|   |              |              |              |
|---|--------------|--------------|--------------|
| C | 2.825289000  | -0.726451000 | 2.384133000  |
| C | 2.164150000  | 0.304894000  | -2.355332000 |
| H | -0.684135000 | -0.545134000 | 5.433984000  |
| H | 1.954009000  | -1.017177000 | 5.159619000  |
| H | 5.327297000  | -0.829997000 | 0.876911000  |
| H | 4.947402000  | -0.274316000 | -1.731915000 |
| H | 0.349629000  | 1.278523000  | -4.560362000 |
| H | -2.139757000 | 1.652073000  | -3.626752000 |
| H | -4.277835000 | 1.547181000  | -0.911196000 |
| H | -4.578325000 | 1.053822000  | 1.710163000  |
| O | -0.052749000 | -1.893781000 | -0.010491000 |
| H | -2.674933000 | 0.154080000  | 3.733664000  |
| H | 3.659756000  | -0.983996000 | 3.029372000  |
| H | 2.790024000  | 0.377750000  | -3.238887000 |
| H | -2.616668000 | -3.156783000 | 3.901153000  |
| C | -2.380496000 | -4.128809000 | 3.426995000  |
| C | -3.003482000 | -4.183521000 | 2.055216000  |
| C | -0.886118000 | -4.326242000 | 3.409282000  |
| H | -2.853469000 | -4.875584000 | 4.087916000  |
| C | -2.271949000 | -4.237822000 | 0.924238000  |
| H | -4.090111000 | -4.181977000 | 2.005866000  |
| C | -0.171905000 | -4.379779000 | 2.267005000  |
| H | -0.390019000 | -4.429463000 | 4.371528000  |
| C | -0.789097000 | -4.209035000 | 0.929570000  |
| H | -2.766758000 | -4.273073000 | -0.043124000 |
| H | 0.905500000  | -4.520325000 | 2.305175000  |
| H | -0.335141000 | -4.837414000 | 0.152915000  |
| H | -0.459489000 | -3.110400000 | 0.531411000  |

#### <sup>4</sup>TS<sub>9</sub>:

|    |              |              |              |
|----|--------------|--------------|--------------|
| Fe | 0.320821000  | -0.305714000 | 0.402779000  |
| N  | 0.533403000  | -0.348450000 | 2.316699000  |
| N  | 2.214203000  | -0.138721000 | 0.068735000  |
| N  | -0.007575000 | 0.467635000  | -1.303254000 |
| N  | -1.472859000 | 0.291219000  | 0.650141000  |
| C  | -0.489484000 | -0.333955000 | 3.270643000  |
| C  | 0.092287000  | -0.613537000 | 4.560332000  |
| C  | 1.446248000  | -0.786815000 | 4.383299000  |
| C  | 1.723028000  | -0.618249000 | 2.979293000  |
| C  | 3.211162000  | -0.445781000 | 0.991393000  |
| C  | 4.479893000  | -0.466915000 | 0.306025000  |
| C  | 4.236670000  | -0.183910000 | -1.019047000 |
| C  | 2.816430000  | 0.019604000  | -1.171373000 |
| C  | 0.778665000  | 0.597100000  | -2.432068000 |
| C  | -0.093872000 | 1.019650000  | -3.509254000 |
| C  | -1.378243000 | 1.132584000  | -2.997622000 |
| C  | -1.309549000 | 0.778405000  | -1.607740000 |
| C  | -2.164392000 | 0.685971000  | -0.470847000 |
| C  | -3.525552000 | 0.918548000  | -0.104227000 |
| C  | -3.631152000 | 0.659313000  | 1.260574000  |
| C  | -2.330418000 | 0.267603000  | 1.733918000  |
| C  | -1.837176000 | -0.050233000 | 3.002638000  |
| C  | 2.972089000  | -0.676355000 | 2.344726000  |
| C  | 2.143654000  | 0.361360000  | -2.366696000 |
| H  | -0.459399000 | -0.652602000 | 5.488912000  |
| H  | 2.188330000  | -0.997784000 | 5.139815000  |
| H  | 5.433388000  | -0.668108000 | 0.772878000  |
| H  | 4.959276000  | -0.109152000 | -1.818995000 |
| H  | 0.217658000  | 1.215656000  | -4.525283000 |
| H  | -2.265037000 | 1.437460000  | -3.532808000 |
| H  | -4.315518000 | 1.249824000  | -0.761944000 |
| H  | -4.519856000 | 0.749525000  | 1.868533000  |
| O  | 0.094509000  | -1.959509000 | 0.099648000  |
| H  | -2.522500000 | -0.044687000 | 3.844596000  |

|   |               |              |              |
|---|---------------|--------------|--------------|
| H | 3.831654000   | -0.899730000 | 2.969210000  |
| H | 2.742663000   | 0.465403000  | -3.265095000 |
| H | -2.939058000  | -2.774809000 | 3.485894000  |
| C | -2.713869000  | -3.816642000 | 3.177850000  |
| C | -3.119778000  | -4.004648000 | 1.739521000  |
| C | -1.255757000  | -4.100293000 | 3.428193000  |
| H | -3.344058000  | -4.436138000 | 3.838616000  |
| C | -2.217223000  | -4.197296000 | 0.752251000  |
| H | -4.183210000  | -3.975201000 | 1.515102000  |
| C | -0.372898000  | -4.291442000 | 2.422523000  |
| H | -0.9327088000 | -4.142052000 | 4.463549000  |
| C | -0.765911000  | -4.202217000 | 1.006111000  |
| H | -2.550520000  | -4.318023000 | -0.275169000 |
| H | 0.673520000   | -4.482646000 | 2.645692000  |
| H | -0.180548000  | -4.827352000 | 0.324261000  |
| H | -0.355162000  | -3.053909000 | 0.612879000  |

#### <sup>2</sup>TS<sub>9</sub>:

|    |              |              |              |
|----|--------------|--------------|--------------|
| Fe | -0.010757000 | 0.333237000  | 0.090338000  |
| N  | -0.020222000 | -0.145815000 | 1.968671000  |
| N  | 1.903620000  | 0.163224000  | -0.069272000 |
| N  | 0.005993000  | 1.527265000  | -1.400524000 |
| N  | -1.666690000 | 1.253003000  | 0.367732000  |
| C  | -1.120433000 | -0.135253000 | 2.819281000  |
| C  | -0.756788000 | -0.811110000 | 4.041075000  |
| C  | 0.551856000  | -1.221796000 | 3.920492000  |
| C  | 1.014996000  | -0.805989000 | 2.619970000  |
| C  | 2.714784000  | -0.529162000 | 0.819416000  |
| C  | 4.028071000  | -0.658791000 | 0.240367000  |
| C  | 3.994443000  | -0.049832000 | -0.994500000 |
| C  | 2.662814000  | 0.466285000  | -1.193947000 |
| C  | 0.925304000  | 1.731397000  | -2.413861000 |
| C  | 0.292486000  | 2.573877000  | -3.398345000 |
| C  | -0.992197000 | 2.860843000  | -2.947862000 |
| C  | -1.155266000 | 2.192558000  | -1.691471000 |
| C  | -2.131701000 | 2.033638000  | -0.659052000 |
| C  | -3.455751000 | 2.470252000  | -0.332819000 |
| C  | -3.768466000 | 1.929788000  | 0.912671000  |
| C  | -2.630078000 | 1.164465000  | 1.358250000  |
| C  | -2.360275000 | 0.473106000  | 2.535733000  |
| C  | 2.286723000  | -0.990381000 | 2.069643000  |
| C  | 2.204966000  | 1.193679000  | -2.311296000 |
| H  | -1.411666000 | -0.943087000 | 4.890678000  |
| H  | 1.147469000  | -1.749809000 | 4.651380000  |
| H  | 4.869581000  | -1.143865000 | 0.713788000  |
| H  | 4.806541000  | 0.050681000  | -1.700475000 |
| H  | 0.752100000  | 2.926890000  | -4.310429000 |
| H  | -1.726657000 | 3.480756000  | -3.440637000 |
| H  | -4.077700000 | 3.120089000  | -0.931164000 |
| H  | -4.684168000 | 2.071504000  | 1.468767000  |
| O  | -0.465305000 | -1.126975000 | -0.631122000 |
| H  | -1.504558000 | -2.045994000 | -0.874985000 |
| C  | -2.312835000 | -2.922606000 | -1.083812000 |
| C  | -3.430294000 | -2.689754000 | -0.140299000 |
| C  | -4.534209000 | -1.896990000 | -0.556059000 |
| C  | -3.808276000 | -2.047513000 | -2.891405000 |
| C  | -2.687525000 | -2.834607000 | -2.513895000 |
| C  | -1.920476000 | -3.447779000 | -3.518079000 |
| C  | -2.237474000 | -3.298916000 | -4.866760000 |
| C  | -3.350486000 | -2.526675000 | -5.231589000 |
| C  | -4.133860000 | -1.910817000 | -4.257149000 |
| C  | -3.389650000 | -3.153703000 | 1.183731000  |
| C  | -4.405027000 | -2.852191000 | 2.090288000  |
| C  | -5.495770000 | -2.074842000 | 1.671142000  |

|   |              |              |              |
|---|--------------|--------------|--------------|
| C | -5.565442000 | -1.603000000 | 0.361875000  |
| H | -1.731193000 | -3.819525000 | -0.847765000 |
| H | -1.058206000 | -4.036887000 | -3.221306000 |
| H | -1.629988000 | -3.777514000 | -5.627279000 |
| H | -3.616099000 | -2.413205000 | -6.277664000 |
| H | -5.008465000 | -1.349621000 | -4.560780000 |
| H | -6.429754000 | -1.030624000 | 0.050643000  |
| H | -6.300287000 | -1.846167000 | 2.362942000  |
| H | -4.354887000 | -3.221664000 | 3.108992000  |
| H | -2.536444000 | -3.746911000 | 1.497837000  |
| H | -3.130070000 | 0.414528000  | 3.297781000  |
| H | 3.015150000  | -1.521161000 | 2.675045000  |
| H | 2.911979000  | 1.365086000  | -3.116686000 |
| N | -4.587274000 | -1.439335000 | -1.885556000 |
| C | -5.525869000 | -0.368363000 | -2.236577000 |
| H | -6.532128000 | -0.746968000 | -2.461571000 |
| H | -5.583747000 | 0.339665000  | -1.407895000 |
| H | -5.147821000 | 0.170096000  | -3.105780000 |

**<sup>4</sup>TS<sub>9</sub>:**

|    |              |              |              |
|----|--------------|--------------|--------------|
| Fe | -0.040670000 | 0.353841000  | 0.074090000  |
| N  | -0.051417000 | -0.149089000 | 1.937306000  |
| N  | 1.873221000  | 0.158280000  | -0.092273000 |
| N  | -0.003062000 | 1.560912000  | -1.400147000 |
| N  | -1.681831000 | 1.279975000  | 0.356236000  |
| C  | -1.151437000 | -0.131250000 | 2.794528000  |
| C  | -0.792091000 | -0.825330000 | 4.007286000  |
| C  | 0.508951000  | -1.254208000 | 3.877680000  |
| C  | 0.975226000  | -0.832637000 | 2.580071000  |
| C  | 2.673734000  | -0.568090000 | 0.782445000  |
| C  | 3.977895000  | -0.726073000 | 0.189935000  |
| C  | 3.950357000  | -0.102615000 | -1.038016000 |
| C  | 2.632109000  | 0.451917000  | -1.219936000 |
| C  | 0.917165000  | 1.760855000  | -2.414300000 |
| C  | 0.288851000  | 2.617111000  | -3.394232000 |
| C  | -0.991441000 | 2.911561000  | -2.942875000 |
| C  | -1.161460000 | 2.236340000  | -1.688906000 |
| C  | -2.139241000 | 2.079862000  | -0.663372000 |
| C  | -3.454732000 | 2.530449000  | -0.328320000 |
| C  | -3.771562000 | 1.983265000  | 0.914047000  |
| C  | -2.645005000 | 1.199090000  | 1.348767000  |
| C  | -2.379859000 | 0.494143000  | 2.521503000  |
| C  | 2.243054000  | -1.034168000 | 2.026484000  |
| C  | 2.186298000  | 1.203326000  | -2.327214000 |
| H  | -1.445644000 | -0.955343000 | 4.858307000  |
| H  | 1.099637000  | -1.797968000 | 4.601031000  |
| H  | 4.809368000  | -1.241427000 | 0.649109000  |
| H  | 4.758602000  | -0.017137000 | -1.750398000 |
| H  | 0.750857000  | 2.968971000  | -4.305628000 |
| H  | -1.721175000 | 3.540249000  | -3.431558000 |
| H  | -4.068950000 | 3.196275000  | -0.917284000 |
| H  | -4.681423000 | 2.137395000  | 1.476424000  |
| O  | -0.582939000 | -1.078900000 | -0.640778000 |
| H  | -1.492272000 | -1.994436000 | -0.834646000 |
| C  | -2.302842000 | -2.943309000 | -1.054747000 |
| C  | -3.411605000 | -2.709900000 | -0.116336000 |
| C  | -4.519717000 | -1.922478000 | -0.537886000 |
| C  | -3.776570000 | -2.067410000 | -2.868836000 |
| C  | -2.652615000 | -2.848580000 | -2.480794000 |
| C  | -1.864541000 | -3.444846000 | -3.481531000 |
| C  | -2.165903000 | -3.287375000 | -4.831675000 |
| C  | -3.283147000 | -2.524135000 | -5.205870000 |
| C  | -4.085463000 | -1.923785000 | -4.237581000 |
| C  | -3.368138000 | -3.159828000 | 1.214621000  |

|   |              |              |              |
|---|--------------|--------------|--------------|
| C | -4.383429000 | -2.851848000 | 2.116966000  |
| C | -5.478788000 | -2.082977000 | 1.690679000  |
| C | -5.551656000 | -1.624550000 | 0.377211000  |
| H | -1.677630000 | -3.804660000 | -0.804331000 |
| H | -1.000521000 | -4.027823000 | -3.178211000 |
| H | -1.543636000 | -3.752990000 | -5.588273000 |
| H | -3.535829000 | -2.405787000 | -6.254490000 |
| H | -4.961600000 | -1.369192000 | -4.548579000 |
| H | -6.417496000 | -1.057037000 | 0.061674000  |
| H | -6.283097000 | -1.850600000 | 2.381272000  |
| H | -4.331284000 | -3.209433000 | 3.139746000  |
| H | -2.512562000 | -3.746387000 | 1.534249000  |
| H | -3.148073000 | 0.441413000  | 3.285679000  |
| H | 2.961914000  | -1.585675000 | 2.624652000  |
| H | 2.891995000  | 1.370089000  | -3.134404000 |
| N | -4.570627000 | -1.471252000 | -1.868898000 |
| C | -5.506934000 | -0.397856000 | -2.223390000 |
| H | -6.512485000 | -0.776264000 | -2.450148000 |
| H | -5.564756000 | 0.311067000  | -1.395508000 |
| H | -5.125442000 | 0.138982000  | -3.091765000 |

**<sup>2</sup>TS<sub>10</sub>:**

|    |              |              |              |
|----|--------------|--------------|--------------|
| Fe | 0.035276000  | 0.062122000  | 0.060573000  |
| N  | -0.014742000 | -0.085882000 | 1.990582000  |
| N  | 1.960617000  | 0.039467000  | -0.016609000 |
| N  | 0.014096000  | 0.977115000  | -1.617662000 |
| N  | -1.702074000 | 0.863007000  | 0.125289000  |
| C  | -1.147243000 | -0.029688000 | 2.794723000  |
| C  | -0.781033000 | -0.449947000 | 4.125407000  |
| C  | 0.561381000  | -0.756156000 | 4.114936000  |
| C  | 1.043503000  | -0.530014000 | 2.775287000  |
| C  | 2.788636000  | -0.413671000 | 1.001101000  |
| C  | 4.132078000  | -0.517653000 | 0.491097000  |
| C  | 4.100615000  | -0.132526000 | -0.831012000 |
| C  | 2.739884000  | 0.216537000  | -1.155207000 |
| C  | 0.955213000  | 1.088691000  | -2.625426000 |
| C  | 0.295236000  | 1.686103000  | -3.759496000 |
| C  | -1.028256000 | 1.924779000  | -3.402434000 |
| C  | -1.187197000 | 1.471495000  | -2.053494000 |
| C  | -2.189744000 | 1.402779000  | -1.036835000 |
| C  | -3.562962000 | 1.754879000  | -0.831793000 |
| C  | -3.880904000 | 1.412615000  | 0.478930000  |
| C  | -2.698683000 | 0.853121000  | 1.087476000  |
| C  | -2.422281000 | 0.402963000  | 2.374057000  |
| C  | 2.347583000  | -0.692075000 | 2.300453000  |
| C  | 2.271128000  | 0.697447000  | -2.394188000 |
| H  | -1.458525000 | -0.492493000 | 4.966444000  |
| H  | 1.167206000  | -1.095492000 | 4.942910000  |
| H  | 4.990569000  | -0.835119000 | 1.065343000  |
| H  | 4.931604000  | -0.077693000 | -1.519835000 |
| H  | 0.761407000  | 1.917304000  | -4.706597000 |
| H  | -1.792248000 | 2.377617000  | -4.016994000 |
| H  | -4.216236000 | 2.217931000  | -1.556811000 |
| H  | -4.832614000 | 1.551032000  | 0.971602000  |
| O  | -0.265883000 | -1.539312000 | -0.391556000 |
| H  | -1.301521000 | -2.456244000 | -0.697651000 |
| C  | -2.081990000 | -3.351357000 | -0.913600000 |
| C  | -3.234132000 | -3.128923000 | -0.000481000 |
| C  | -4.430709000 | -2.553901000 | -0.501126000 |
| C  | -3.612610000 | -2.743820000 | -2.812949000 |
| C  | -2.394570000 | -3.316046000 | -2.366982000 |
| C  | -1.480658000 | -3.764095000 | -3.336143000 |
| C  | -1.751925000 | -3.648311000 | -4.698917000 |
| C  | -2.960646000 | -3.070523000 | -5.123835000 |

|   |              |              |              |   |              |              |              |
|---|--------------|--------------|--------------|---|--------------|--------------|--------------|
| C | -3.888584000 | -2.623511000 | -4.187807000 | C | -3.128902000 | -3.379245000 | 1.428742000  |
| C | -3.151815000 | -3.390074000 | 1.377095000  | C | -4.182950000 | -3.060859000 | 2.283444000  |
| C | -4.207267000 | -3.089615000 | 2.238170000  | C | -5.360077000 | -2.491988000 | 1.763875000  |
| C | -5.383199000 | -2.512473000 | 1.727484000  | C | -5.476576000 | -2.252671000 | 0.398226000  |
| C | -5.497235000 | -2.247282000 | 0.366307000  | H | -1.412067000 | -4.188580000 | -0.553459000 |
| H | -1.477196000 | -4.220526000 | -0.630808000 | H | -0.512291000 | -4.245544000 | -2.930643000 |
| H | -0.541006000 | -4.193286000 | -3.002410000 | H | -0.992220000 | -4.077296000 | -5.359920000 |
| H | -1.029571000 | -3.997510000 | -5.428759000 | H | -3.135325000 | -3.063738000 | -6.135687000 |
| H | -3.176163000 | -2.973702000 | -6.182848000 | H | -4.797111000 | -2.256376000 | -4.480154000 |
| H | -4.828674000 | -2.183836000 | -4.510467000 | H | -6.386102000 | -1.821265000 | -0.010808000 |
| H | -6.406997000 | -1.810010000 | -0.036164000 | H | -6.183283000 | -2.243103000 | 2.425558000  |
| H | -6.208281000 | -2.276940000 | 2.391917000  | H | -4.095230000 | -3.251785000 | 3.347574000  |
| H | -4.120240000 | -3.300934000 | 3.298522000  | H | -2.212663000 | -3.802151000 | 1.828405000  |
| H | -2.235252000 | -3.819324000 | 1.769511000  | H | -3.238648000 | 0.434515000  | 3.074364000  |
| H | -3.216868000 | 0.404190000  | 3.112596000  | H | 3.050668000  | -1.089587000 | 2.968836000  |
| H | 3.091485000  | -1.044700000 | 3.008359000  | H | 2.991358000  | 0.816926000  | -3.218254000 |
| H | 2.995636000  | 0.793841000  | -3.196517000 | N | -4.527039000 | -2.367988000 | -1.834618000 |
| N | -4.549123000 | -2.324916000 | -1.868705000 | H | -5.372226000 | -1.934478000 | -2.177356000 |
| H | -5.397088000 | -1.891833000 | -2.204227000 |   |              |              |              |

#### <sup>4</sup>TS<sub>10</sub>:

|    |              |              |              |
|----|--------------|--------------|--------------|
| Fe | 0.012195000  | 0.088965000  | 0.026818000  |
| N  | -0.040755000 | -0.078388000 | 1.949860000  |
| N  | 1.941509000  | 0.049734000  | -0.044744000 |
| N  | 0.010561000  | 1.018726000  | -1.636153000 |
| N  | -1.716400000 | 0.884031000  | 0.087975000  |
| C  | -1.176193000 | -0.020090000 | 2.754761000  |
| C  | -0.815880000 | -0.458992000 | 4.080527000  |
| C  | 0.522837000  | -0.779576000 | 4.068709000  |
| C  | 1.010720000  | -0.543976000 | 2.733131000  |
| C  | 2.760987000  | -0.435412000 | 0.968338000  |
| C  | 4.100168000  | -0.566637000 | 0.454287000  |
| C  | 4.075856000  | -0.167295000 | -0.864429000 |
| C  | 2.724115000  | 0.218048000  | -1.181679000 |
| C  | 0.957515000  | 1.131157000  | -2.640566000 |
| C  | 0.302603000  | 1.743391000  | -3.773983000 |
| C  | -1.018562000 | 1.985533000  | -3.421582000 |
| C  | -1.187819000 | 1.520393000  | -2.075020000 |
| C  | -2.195144000 | 1.447995000  | -1.069392000 |
| C  | -3.561411000 | 1.819849000  | -0.859334000 |
| C  | -3.885644000 | 1.469803000  | 0.447950000  |
| C  | -2.714911000 | 0.885747000  | 1.050903000  |
| C  | -2.443394000 | 0.426784000  | 2.336501000  |
| C  | 2.314912000  | -0.718626000 | 2.261820000  |
| C  | 2.265572000  | 0.722753000  | -2.417132000 |
| H  | -1.495211000 | -0.503467000 | 4.920063000  |
| H  | 1.123625000  | -1.134881000 | 4.893698000  |
| H  | 4.951478000  | -0.913609000 | 1.022313000  |
| H  | 4.906560000  | -0.127363000 | -1.554629000 |
| H  | 0.774505000  | 1.978085000  | -4.717425000 |
| H  | -1.777978000 | 2.447285000  | -4.035214000 |
| H  | -4.206391000 | 2.303713000  | -1.578392000 |
| H  | -4.833138000 | 1.624882000  | 0.943765000  |
| O  | -0.376654000 | -1.487959000 | -0.445656000 |
| H  | -1.295594000 | -2.392345000 | -0.665681000 |
| C  | -2.071566000 | -3.372665000 | -0.864598000 |
| C  | -3.212116000 | -3.142839000 | 0.045027000  |
| C  | -4.411163000 | -2.574793000 | -0.463765000 |
| C  | -3.588028000 | -2.795915000 | -2.771450000 |
| C  | -2.369939000 | -3.362179000 | -2.311285000 |
| C  | -1.450837000 | -3.820918000 | -3.272834000 |
| C  | -1.717646000 | -3.720418000 | -4.636871000 |
| C  | -2.925296000 | -3.148265000 | -5.074633000 |
| C  | -3.858152000 | -2.691427000 | -4.148291000 |
